# Supplementary material
Source: PubMed Central journal article supplement (PMC10234497)
Supplement: NIHMS1770551-supplement-Supplement.pdf [file NIHMS1770551-supplement-Supplement.pdf]

# **Metagenome guided medicinal chemistry yields improved Gram-negative active albicidin and cystobactamid type antibiotics**

Zongqiang Wang‡, Amanda Kasper‡, Rabia Mehmood, Melinda Ternei, Shaogang Li, Joel S. Freundlich and Sean F. Brady\*

## Table of Contents

1. Experiment procedures.
2. Supplementary Table S1. Bacteria strain information.
3. Supplementary Table S2. MIC values of syn-BNPs against engineered *E. coli*.
4. Supplementary Table S3. PABA48 biosynthetic gene cluster annotation.
5. Supplementary Table S4. PABA70 biosynthetic gene cluster annotation.
6. Supplementary Table S5. PABA57 biosynthetic gene cluster annotation.
7. Supplementary Table S6. PABA34 biosynthetic gene cluster annotation.
8. Supplementary Table S7. PABA157 biosynthetic gene cluster annotation.
9. Supplementary Table S8. PABA95 biosynthetic gene cluster annotation.
10. Supplementary Table S9. Albicidin 10 signature code analysis.
11. Supplementary Table S10. Cystobactamid 10 signature code analysis.
12. Supplementary Table S11. PABA48 10 signature code analysis.
13. Supplementary Table S12. PABA70 10 signature code analysis.
14. Supplementary Table S13. PABA57 10 signature code analysis.
15. Supplementary Table S14. PABA34 10 signature code analysis.
16. Supplementary Table S15. PABA157 10 signature code analysis.
17. Supplementary Table S16. PABA95 10 signature code analysis.
18. Supplementary Table S17. Resistance frequency of syn-BNPs and ciprofloxacin.
19. Supplementary Table S18. MIC values of syn-BNPs against additional pathogen strains.
20. Supplementary Figure S1. Proposed PABA48 biosynthetic pathway.
21. Supplementary Figure S2. Proposed PABA70 biosynthetic pathway.
22. Supplementary Figure S3. Proposed PABA57 biosynthetic pathway.
23. Supplementary Figure S4. Proposed PABA34 biosynthetic pathway.
24. Supplementary Figure S5. Proposed PABA157 biosynthetic pathway.
25. Supplementary Figure S6. Proposed PABA95 biosynthetic pathway.
26. Supplementary Figure S7. SDS-PAGE analysis of purified AlbD protein.
27. Supplementary Figure S8. DNA gyrase supercoiling assay.
28. Supplementary Figure S9. Time-dependent killing curves.
29. Supplementary Figure S10. Resistance after serial passage.
30. Total synthesis of PABA48
31. Total synthesis of PABA70
32. Total synthesis of PABA57
33. Total synthesis of PABA34
34. Total synthesis of PABA157
35. Total synthesis of PABA95 and PABA95-2
36. Supplementary Figure S11. <sup>1</sup>H-NMR spectrum of PABA48 (S13) in DMSO-*d*<sub>6</sub>
37. Supplementary Figure S12. <sup>1</sup>H-NMR spectrum of PABA70 (S16) in DMSO-*d*<sub>6</sub>
38. Supplementary Figure S13. <sup>1</sup>H-NMR spectrum of PABA57 (S24) in DMSO-*d*<sub>6</sub>
39. Supplementary Figure S14. <sup>1</sup>H-NMR spectrum of PABA34 (S37) in DMSO-*d*<sub>6</sub>
40. Supplementary Figure S15. <sup>1</sup>H-NMR spectrum of PABA157 (S47) in DMSO-*d*<sub>6</sub>
41. Supplementary Figure S16. <sup>1</sup>H-NMR spectrum of PABA95 (S53) in DMSO-*d*<sub>6</sub>
42. Supplementary Figure S17. <sup>1</sup>H-NMR spectrum of PABA95-2 in DMSO-*d*<sub>6</sub>

## Experimental Procedures

### 1.1 Construction of PABA phylogenetic tree

The construction and screening of soil environmental DNA (eDNA) libraries have been described in detail previously.<sup>[1, 2]</sup> In this study, 15 previously achieved eDNA cosmid libraries were used to screen biosynthetic gene clusters (BGCs) that encode PABA based metabolites. Briefly, each cosmid library containing ~20 million eDNA cosmid clones was constructed into EC100 cells and arrayed into 2x384 well plates for PCR screening and clone recovery. To identify wells containing PABA specific BGCs, all libraries were screened by PCR using barcoded A domain degenerate primers (A3F: 5'-GCSTACSYSATSTACACSTCSGG-3' and A7R: (5'-SASGTCVCCSGTSCGGTA-3')).<sup>[3]</sup> Methods for primer barcoding, PCR conditions, MiSeq sequencing, and sequence data processing have been described previously in detail.<sup>[4]</sup> The resulting amplicon sequence data were analyzed using eSNaPD (Environmental Surveyor of Natural Product Diversity) software<sup>[5]</sup> to identify hits related to PABA selective A domain sequences from albicidin and cystobactamid BGCs. Sequences that matched known PABA selective A domain sequences with E-values less than 10<sup>25</sup> were considered hits. These sequences were aligned together with known PABA selective A domain sequences using MUSCLE.<sup>[6]</sup> The resulting phylogenetic tree was visualized using iTOLv5 software.<sup>[7]</sup> Hits found in new clades that are phylogenetically close to those containing known PABA selective A domain sequences were considered to be associated with potentially novel PABA-encoding BGCs.

### 1.2 Recovery of PABA-containing BGCs

The well locations of cosmids containing BGCs that encode PABA-containing metabolites were identified using well-specific barcode sequences incorporated in the A domain degenerate primers. Specific primers targeting each unique sequence of interest were designed manually. To recover single cosmid clones of interest, a serial dilution PCR method described previously was used.<sup>[2, 4]</sup> Recovered single clones containing PABA encoding sequences were mini-prepped and sequenced by Illumina MiSeq technology. To identify cosmids with inserts overlapping the initially recovered primary cosmid, primer pairs were designed to amplify ~500 bp from each edge of primary cosmid. These primers were utilized to screen cosmid subpools. Identified overlapping cosmids were recovered as described above. The overlapping cosmids were then sequenced and assembled *in silico* with primary cosmid sequences into a single continuous sequence using Geneious software (Version 11.0.3).

### 1.3 Bioinformatic prediction of PABA-containing BGCs

Fully assembled PABA-containing BGCs were analyzed using an annotation pipeline consisting of open reading frame (ORF) predictions by MetaGeneMark<sup>[8]</sup> and BLAST searches<sup>[9]</sup>. The annotation script was developed using the Python Programming language and is available in the open source repository: <https://github.com/brady-lab-rockefeller/geneannotation>. Each NRPS A domain was analyzed using antiSMASH 5.0 (bacterial version) to identify its 10-amino acid A domain signature code including amino acids at positions 235, 236, 239, 278, 299, 301, 322, 330, 331, and 517.<sup>[10]</sup> These 10 amino acid signatures were then compared to known A domain signatures. This information combined with the predicted functions of any an encoded tailor enzyme were used to predict the building blocks of the PABA-containing congeners encoded by each BGC.

### 1.4 Synthesis of PABA-containing congeners

*Instruments, reagents, and consumables:* Unless stated otherwise, all reactions conducted in organic solvents were performed in oven-dried glassware under an atmosphere of argon or nitrogen. Dry THF, DMF, and CH<sub>2</sub>Cl<sub>2</sub> were purchased and stored in Sure/Seal bottles obtained from Sigma-Aldrich. Coupling reagent 1-[Bis(dimethylamino)methylene]-1*H*-1,2,3-triazolo[4,5-*b*]-pyridinium 3-oxid hexafluorophosphate (HATU) and standard amino acid building blocks were purchased from P3 Biosystems (Louisville, KY). All other reagents and consumables were purchased from Sigma-Aldrich (St. Louis, MO), Thermo Fisher Scientific (Waltham, MA), or VWR (Radnor, PA). Purchased reagents and chemicals were used as received, unless stated otherwise. Reactions were monitored by thin-layer chromatography (TLC) on glass silica gel 60 F<sub>254</sub> plates by EMD Millipore and visualized by UV irradiation or development with *p*-anisaldehyde or ninhydrin stain. Volatile solvents were removed under reduced pressure using a rotary evaporator. Flash column chromatography was conducted using a CombiFlash R<sub>i</sub> 200 system by Teledyne ISCO using normal-phase RediSep Rf silica gel columns or completed manually using Sorbtech standard grade silica gel (particle size: 40-63 μm). Target compounds were purified using an Agilent 1200 series HPLC (Santa Clara, CA) equipped with a Waters XBridge C18 5μm column (10 mm x 250 mm). Samples were eluted using a linear gradient of solvent B (ACN with 0.1% formic acid) over solvent A (H<sub>2</sub>O with 0.1% formic acid). Prep-HPLC purifications were completed using a Shimadzu LC-20AB HPLC equipped with a Phenomenex C18 15 μm column (150 mm x 40 mm) or Phenomenex C18 3 μm column (75 mm x 30 mm) eluting with a linear gradient of solvent B (ACN with 0.1% TFA) over solvent A (H<sub>2</sub>O with 0.1% TFA). High-resolution mass spectra (HRMS) were obtained using a Sciex X500R Q-TOF system (Framingham, MA). <sup>1</sup>H-NMR and <sup>13</sup>C-NMR spectra were recorded using Bruker AV600 or Bruker Avance NEO operating at

600 or 400 MHz for  $^1\text{H}$  (151 MHz for  $^{13}\text{C}$ ) in  $\text{CDCl}_3$  or  $\text{DMSO-}d_6$ . The chemical shifts are reported in ppm using the residual solvent peak as an internal reference ( $\text{CDCl}_3$  or  $\text{DMSO-}d_6$ ). Multiplicity (brs = broad singlet, s = singlet, d = doublet, dd = doublet of doublet, t = triplet, q = quartet, m = multiplet) and coupling constants ( $J$  = Hz) are quoted where possible.

### 1.5 Microbial susceptibility assay

Syn-BNPs were tested against a panel of ESKAPE pathogens as well as the ciprofloxacin-resistant bacteria shown in Supplementary Table S1. MIC assays were conducted following the protocol recommended by the Clinical and Laboratory Standards Institute.<sup>[11]</sup> Assays were performed in duplicate in 96-well microliter plates. Syn-BNPs were dissolved into DMSO to give 1.6 mg/mL stock solutions. Ciprofloxacin (Sigma) was used as positive control. Stock solutions were diluted across 96-well plates using a 2-fold serial dilution to give a concentration range of 16 to 0.015  $\mu\text{g/mL}$  in 50  $\mu\text{L}$  of LB broth. The top and bottom rows of each plate were filled with 100  $\mu\text{L}$  of LB broth without compound to avoid edge effects. The last well in each row contained bacteria but did not contain compounds. A single colony of each bacterial assay strain was inoculated into 5 mL of LB broth medium and grown overnight at 37 °C. The saturated overnight culture was diluted 5,000-fold in fresh LB, and 50  $\mu\text{L}$  were transferred into each well of the assay plates. Each well contained a total volume of 100  $\mu\text{L}$ . MIC values were determined by visual inspection of the minimum concentration that prevented bacteria growth after 18 h of static incubation at 37°C.

### 1.6 Resistant mutation generation

Autoclaved LB agar was cooled to 55 °C and mixed with ciprofloxacin at a concentration of 4x its MIC against *E. coli* ATCC25922. The mixture was poured into a 150 x 15 mm petri dish and allowed to solidify. A single colony of *E. coli* ATCC25922 was used to inoculate 5 mL of LB medium and was grown overnight at 37 °C. 500  $\mu\text{L}$  of the overnight culture was used to inoculate 50 mL of fresh LB. Upon reaching log phase,  $1 \times 10^8$  cells from the culture were spread on the ciprofloxacin-containing agar plate. The plate was incubated overnight at 37 °C and the number of resistant colonies were counted after a 16 h incubation. Resistant colonies were struck on ciprofloxacin-containing plates to confirm the resistant phenotype. To identify point mutations in the quinolone-resistance-determining region (QNDR), resistant colonies were subjected to colony PCR using the following primers: GyrA-FW: TGCCAGATGTCCGAGAT, GyrB-RV: GTATAACGCATTGCCGC. The PCR products were Sanger sequenced and the amplicon sequences were aligned with the wild-type of GyrA QNDR sequence using SnapGene (Version 5.2.1) to reveal point mutations.

### 1.7 DNA gyrase supercoiling assay

An *E. coli* gyrase supercoiling assay kit from TopoGEN was used for *in vitro* DNA gyrase supercoiling assays. Serial dilutions of PABA syn-BNPs as well as a ciprofloxacin positive control were prepared [concentration range from 0.04 to 10.24  $\mu\text{M}$ ] in DMSO. Assays were performed according to the manufacturer's protocol. Briefly, fresh diluted *E. coli* gyrase (1U) was mixed with each inhibitor and 250 ng relaxed plasmid pHOT1. The final volume of each reaction was adjusted to 20  $\mu\text{L}$  with  $\text{H}_2\text{O}$ . A reaction with all materials except enzyme was used as a control. Reactions were quenched after 60 min at 37°C by the addition of 2  $\mu\text{L}$  of 10% (w/v) SDS and then treatment for 30 min with 50  $\mu\text{g/mL}$  proteinase K. Relaxed (REL) and supercoiled (SC) plasmids were extracted with chloroform/isoamyl alcohol (24:1 mixture), separated on 1% (w/v) agarose gels, and visualized by 0.5 mg/mL ethidium bromide staining. Image analysis (intensity of SC plasmid bands) was performed using Analytik Jena image software. The intensity of supercoiled bands was used to determine the  $\text{IC}_{50}$  of each syn-BNP.

### 1.8 AlbD expression and purification

The gene sequence of AlbD from *Pantoea dispersa* was retrieved from NCBI (AAB71813). It was synthesized by Genewiz (USA) to include NdeI and EcoRI restriction sites, which were used to clone the gene into the pET28c vector. pET28c-AlbD was introduced into *E. coli* BL21(DE3) cells (NEB) by electroporation. For recombinant expression of AlbD, a single colony was used to inoculate 50 mL of fresh LB broth containing 50  $\mu\text{g/mL}$  kanamycin. The culture was grown overnight at 37°C with shaking at 220 rpm. The next day, 500  $\mu\text{L}$  of the overnight culture was used to inoculate 1 L of fresh LB containing 50  $\mu\text{g/mL}$  kanamycin. The culture was grown with shaking at 220 rpm to  $\text{OD}_{600\text{ nm}}$  0.8-1.0. For protein expression, the culture was cooled down to 16 °C and allowed to grow for additional 8-12 h in the presence of 0.5 mM of isopropyl- $\beta$ -D-thiogalactoside (IPTG). The culture was then harvested by centrifugation at 3,724 g for 10 min. The cell pellet was lysed in B-PER bacterial protein extraction solution (ThermoFisher) following the manufacturer's protocol. The lysate was centrifuged at 21,1300 g for 10 min and the insoluble cellular material was removed. The supernatant was injected into an AKTA system (GE-Healthcare) equipped with a 1 mL His-trap-FF column. Recombinant proteins were eluted using a 5 to 100% gradient of buffer A to buffer B over 20 column volume. (Buffer A: 20 mM Tris-HCl pH 7.5, 10% glycerol, 150 mM NaCl. Buffer B: 20 mM Tris-HCl pH 7.5, 10% glycerol, 150 mM NaCl, 1 M Imidazole). Eluted fractions were collected and checked by SDS-PAGE to identify fractions containing AlbD. Fractions containing AlbD were pooled and concentrated by centrifugation using a 10 kDa concentrator (Millipore Corp., USA). The concentration of purified protein was determined using a Bradford assay (Sigma) and BSA as a control.

### **1.9 AlbD cleavage assay**

The AlbD cleavage assay was performed using a previously reported protocol with slight modifications.<sup>[12]</sup> 120  $\mu$ M of tested compounds and 50  $\mu$ M of purified AlbD protein were added to 100  $\mu$ L of assay buffer - 20mM Tris-HCl pH 7.5, 10% glycerol, 150 mM NaCl. An AlbD-free assay mixture containing only test compound was used as negative control. Reactions were incubated for 20 min at 28°C and stopped by adding 350  $\mu$ L of methanol to precipitated protein and salts. The precipitated pellet was removed by centrifugation at 211,300 g for 15 min. An aliquot of supernatant (5  $\mu$ L) was analyzed via LCMS (Waters Acquity UPLC). Runs were completed using a gradient of 5-95% H<sub>2</sub>O/acetonitrile (0.1% formic acid) over 6 min. All reactions were performed in duplicate and repeated three times. The efficiency of cleavage for each albicidin congener is calculated by a relative cleavage ratio (RCR) compared to the cleavage of albicidin. The remaining peak area of a digested antibiotic (AUC congener) was divided by the peak area for a reaction with same antibiotic but no AlbD (AUC control). Each normalized cleavage ratio ( $1-(AUC_{congener}/AUC_{control})$ ) was divided by the normalized cleavage ratio an AlbD-catalyzed albicidin cleavage ( $1-(AUC_{ALBI}/AUC_{ALBIcontrol})$ ) to obtain a relative cleavage ratio (RCR) compared to albicidin.

### **2.0 Time-dependent killing assay**

An overnight culture of *E. coli* ATCC25922 were diluted 1:10,000 in MHB medium and incubated at 37°C for 2 h. Exponential phase bacteria (3 mL) were then challenged with syn-BNPs and ciprofloxacin at 10 x MICs in culture tubes at 37°C and 200 r.p.m. An untreated sample was used as negative control. After 1, 4, 9 and 24 hours of incubation, 20  $\mu$ L aliquots were removed, centrifuged and resuspended in PBS buffer. Serial diluted suspensions were then plated on MHB agar plates and incubated at 37°C overnight. Colonies were counted. Experiments were performed in triplicate.

## Supplementary Table S1. Strain information

| Group            | Name of Bacteria                   | Strain        |
|------------------|------------------------------------|---------------|
| Firmicutes       | <i>Escherichia coli</i>            | ATCC25922     |
|                  | <i>Escherichia coli_gyrA(D87G)</i> | ATCC25922     |
|                  | <i>Escherichia coli_gyrA(S83L)</i> | ATCC25922     |
|                  | <i>Escherichia coli</i>            | BL21(DE3)     |
| ESKAPE pathogens | <i>Enterococcus faecium</i>        | Com15         |
|                  | <i>Staphylococcus aureus</i>       | SH1000        |
|                  | <i>Klebsiella pneumonia</i>        | ATCC10031     |
|                  | <i>Acinetobacter baumannii</i>     | ATCC17978     |
|                  | <i>Pseudomonas aeruginosa</i>      | PAO1          |
|                  | <i>Enterobacter cloacae</i>        | ATCC13047     |
|                  | <i>Staphylococcus aureus</i>       | USA300        |
|                  | <i>Staphylococcus aureus</i>       | ATCC BAA-42   |
|                  | <i>Staphylococcus aureus</i>       | ATCC BAA-1721 |
|                  | <i>Staphylococcus aureus</i>       | NRS146        |
|                  | <i>Staphylococcus epidermidis</i>  | RP62A         |
|                  | <i>Enterococcus faecalis</i>       | 781           |
|                  | <i>Enterococcus faecium</i>        | EF16          |
|                  | <i>Enterococcus casseliflavus</i>  | 788           |

**Supplementary Table S2.** MIC values of syn-BNPs against engineered *E. coli*.

| Bacteria                                  | Albicidin | PABA48 | PABA70 | PABA57 | PABA34 | PABA157 | PABA95 | PABA95-2 | Ciprofloxacin |
|-------------------------------------------|-----------|--------|--------|--------|--------|---------|--------|----------|---------------|
| <i>E. coli</i> -BL21<br>(pET28c)          | 0.0019    | 0.06   | 0.5    | 0.5    | 0.0075 | 0.0075  | 0.015  | 0.06     | 0.0009        |
| <i>E. coli</i> -BL21<br>(pET28c-<br>AlbD) | 0.25      | >8.0   | >64    | >64    | 0.03   | 1.0     | 2.0    | 0.5      | 0.0019        |
| Fold increase                             | 131       | >133   | >128   | >128   | 4      | 133     | 133    | 8        | 2             |

**Supplementary Table S3. PABA48 biosynthetic gene cluster analysis**

| Orf | Gene Size (bp) | Gene Name | Proposed Function                  | Protein [Organism], Accession Number                                                               | Protein ID% |
|-----|----------------|-----------|------------------------------------|----------------------------------------------------------------------------------------------------|-------------|
| 1   | 1932           | P48A      | Iterative methylation of PABA      | Cobalamin B12-binding domain-containing protein [ <i>Cystobacter ferrugineus</i> ], WP_071903907.1 | 86%         |
| 2   | 639            | P48B      | O-methyltransferase of hydroxy-Asn | SAM-dependent methyltransferase [ <i>Cystobacter ferrugineus</i> ], WP_120590329.1                 | 77%         |
| 3   | 696            | P48C      | Hydroxylation of PABA              | Glyoxalase/bleomycin resistance protein/dioxygenase [ <i>Cystobacter sp. Cbv34</i> ], AKP45388.1   | 73%         |
| 4   | 612            | P48D      | Self-resistance protein            | Pentapeptide repeat-containing protein [ <i>Cystobacter ferrugineus</i> ], WP_071903904.1          | 76%         |
| 5   | 426            | P48E      | Unknown                            | IS5 family transposase [ <i>Methylorubrum extorquens</i> ], OHV16442.1                             | 63%         |
| 6   | 1656           | P48F      | Unknown                            | ISL3 family transposase [ <i>Coralloccoccus macrosporus</i> ], WP_095960599.1                      | 87%         |
| 7   | 1188           | P48G      | Unknown                            | Cytochrome P450 [ <i>Dictyobacter kobayashii</i> ], WP_126554500.1                                 | 74%         |
| 8   | 198            | P48H      | A domain activation                | MbtH family protein [ <i>Cystobacter ferrugineus</i> ], WP_071903903.1                             | 68%         |
| 9   | 927            | P48I      | Aminoacyltransferase               | Alpha/beta hydrolase [ <i>Coralloccoccus sp. CA054B</i> ], WP_120590331.1                          | 69%         |
| 10  | 1377           | P48J      | Dioxygenation of PABA              | Phenylacetate-CoA oxygenase [ <i>Coralloccoccus sp. CA054B</i> ], WP_120590332.1                   | 75%         |
| 11  | 2193           | P48K      | PABA biosynthesis                  | Aminodeoxychorismate synthase component I [ <i>Cystobacter ferrugineus</i> ], WP_071903900.1       | 79%         |
| 12  | 819            | P48M      | Thioesterase                       | Thioesterase [ <i>Cystobacter ferrugineus</i> ], WP_071903899.1                                    | 75%         |
| 13  | 1038           | P48N      | O-methyltransferase of PABA        | Methyltransferase domain-containing protein [ <i>Cystobacter ferrugineus</i> ], WP_071903898.1     | 88%         |
| 14  | 5973           | P48O      | NRPS                               | Non-ribosomal peptide synthetase [ <i>Cystobacter ferrugineus</i> ], WP_071903897.1                | 74%         |
| 15  | 2934           | P48P      | NRPS                               | Non-ribosomal peptide synthetase [ <i>Cystobacter ferrugineus</i> ], WP_187345315.1                | 84%         |
| 16  | 819            | P48Q      | PABA biosynthesis                  | aminodeoxychorismate lyase [ <i>Coralloccoccus sp. CA054B</i> ], WP_158616735.1                    | 86%         |
| 17  | 984            | P48R      | Hydroxylation of Asn               | TauD/TfdA family dioxygenase [ <i>Cystobacter ferrugineus</i> ], WP_071903894.1                    | 85%         |
| 18  | 6135           | P48S      | NRPS                               | Non-ribosomal peptide synthetase [ <i>Cystobacter sp. Cbv34</i> ], AKP45399.2                      | 75%         |
| 19  | 4713           | P48T      | NRPS                               | Non-ribosomal peptide synthetase [ <i>Cystobacter sp. Cbv34</i> ], AKP45399.2                      | 66%         |
| 20  | 2106           | P48U      | NRPS                               | Non-ribosomal peptide synthetase [ <i>Cystobacter sp. Cbv34</i> ], AKP45399.2                      | 82%         |
| 21  | 2721           | P48V      | Unknown                            | Benzoate-CoA ligase [ <i>Cystobacter sp. Cbv34</i> ], AKP45400.1                                   | 70%         |
| 22  | 1500           | P48W      | Transporter                        | MFS transporter [ <i>Coralloccoccus sp. CA054B</i> ], WP_158616558.1                               | 78%         |
| 23  | 1074           | P48R      | PABA biosynthesis                  | 3-deoxy-7-phosphoheptulonate synthase [ <i>Cystobacter ferrugineus</i> ], WP_071901016.1           | 91%         |



**Supplementary Table S4. PABA70 biosynthetic gene cluster analysis**

| Orf | Gene Size (bp) | Gene Name | Proposed Function                  | Protein [Organism], Accession Number                                                             | Protein ID% |
|-----|----------------|-----------|------------------------------------|--------------------------------------------------------------------------------------------------|-------------|
| 1   | 639            | P70A      | O-methyltransferase of hydroxy-Asn | (SAM)-dependent O-methyltransferase [ <i>Cystobacter sp. Cbv34</i> ], AKP45386.1                 | 78%         |
| 2   | 684            | P70B      | Hydroxylation of PABA              | Glyoxalase/bleomycin resistance protein/dioxygenase [ <i>Cystobacter sp. Cbv34</i> ], AKP45388.1 | 74%         |
| 3   | 657            | P70C      | Self-resistance protein            | Pentapeptide repeat-containing protein [ <i>Cystobacter ferrugineus</i> ], WP_071903904.1        | 77%         |
| 4   | 216            | P70D      | A domain activation                | MbtH family NRPS accessory protein [ <i>Corallococcus sp. CA054B</i> ],                          | 74%         |
| 5   | 960            | P70E      | Hydroxylation of PABA              | Alpha/beta hydrolase [ <i>Corallococcus sp. CA054B</i> ], WP_120590331.1                         | 71%         |
| 6   | 1407           | P70F      | Dioxygenation of PABA              | Phenylacetate-CoA oxygenase subunit Paal [ <i>Corallococcus sp. CA054B</i> ], WP_120590332.1     | 74%         |
| 7   | 2196           | P70G      | PABA biosynthesis                  | Para-aminobenzoate synthase [ <i>Cystobacter sp. Cbv34</i> ], AKP45392.1                         | 78%         |
| 8   | 699            | P70H      | Thioesterase                       | Thioesterase [ <i>Cystobacter ferrugineus</i> ], WP_071903899.1                                  | 78%         |
| 9   | 1038           | P70I      | O-methyltransferase of PABA        | Methyltransferase domain-containing protein [ <i>Cystobacter ferrugineus</i> ], WP_071903898.1   | 85%         |
| 10  | 5991           | P70J      | NRPS                               | Non-ribosomal peptide synthase [ <i>Cystobacter sp. Cbv34</i> ], AKP45395                        | 75%         |
| 11  | 2973           | P70K      | NRPS                               | Non-ribosomal peptide synthase [ <i>Cystobacter sp. Cbv34</i> ], AKP45396.1                      | 80%         |
| 12  | 819            | P70M      | PABA biosynthesis                  | Aminodeoxychorismate lyase [ <i>Cystobacter ferrugineus</i> ], WP_071903895.1                    | 82%         |
| 13  | 1029           | P70N      | Hydroxylation of Asn               | TauD/TfdA family dioxygenase [ <i>Cystobacter ferrugineus</i> ], WP_071903894.1                  | 82%         |
| 14  | 12948          | P70O      | NRPS                               | Non-ribosomal peptide synthase [ <i>Cystobacter sp. Cbv34</i> ], AKP45399.2                      | 70%         |
| 15  | 2154           | P70P      | Unknown                            | Benzoate-CoA ligase [ <i>Cystobacter sp. Cbv34</i> ], OJH37549.1                                 | 70%         |
| 16  | 1536           | P70Q      | Transporter                        | MFS transporter [ <i>Corallococcus sp. CA054B</i> ], RKG70114.1                                  | 74%         |
| 17  | 789            | P70R      | Unknown                            | Ester cyclase [ <i>Deltaproteobacteria bacterium</i> ], MBA3820360.1                             | 40%         |
| 18  | 893 partial    | P70S      | Iterative methylation of PABA      | Radical SAM protein [ <i>Corallococcus sp. CA054B</i> ], RKG65320.1                              | 85%         |

## Supplementary Table S5. PABA57 biosynthetic gene cluster analysis

| Orf | Gene Size (bp) | Gene Name | Proposed Function             | Protein [Organism], Accession Number                                                           | Protein ID% |
|-----|----------------|-----------|-------------------------------|------------------------------------------------------------------------------------------------|-------------|
| 1   | 660 partial    | P57A      | Dioxygenation of PABA         | Phenylacetate-CoA oxygenase [ <i>Corallococcus sp. CA054B</i> ], WP_120590332.1                | 59%         |
| 2   | 2097           | P57B      | PABA biosynthesis             | Para-aminobenzoate synthase [ <i>Cystobacter sp. Cbv34</i> ], AKP45392.1                       | 67%         |
| 3   | 1797           | P57C      | Iterative methylation of PABA | Methyltransferase domain-containing protein [ <i>Cystobacter ferrugineus</i> ], WP_071903898.1 | 74%         |
| 4   | 5895           | P57D      | NRPS                          | Non-ribosomal peptide synthetase [ <i>Cystobacter ferrugineus</i> ], WP_071903897.1            | 64%         |
| 5   | 2760           | P57E      | NRPS                          | Non-ribosomal peptide synthase [ <i>Cystobacter sp. Cbv34</i> ], AKP45396.1                    | 71%         |
| 6   | 969            | P57F      | Hydroxylation of Asn          | TauD/TfdA family dioxygenase [ <i>Cystobacter ferrugineus</i> ], WP_071903894.1                | 72%         |
| 7   | 1455           | P57G      | NRPS                          | Non-ribosomal peptide [ <i>Corallococcus sp. CA054B</i> ], WP_147447375.1                      | 71%         |
| 8   | 4113           | P57H      | NRPS                          | Non-ribosomal peptide synthase [ <i>Cystobacter sp. Cbv34</i> ], AKP45399.2                    | 64%         |
| 9   | 7095           | P57I      | NRPS                          | Non-ribosomal peptide synthase [ <i>Cystobacter sp. Cbv34</i> ], AKP45399.2                    | 66%         |
| 10  | 2745           | P57J      | Unknown                       | benzoate-CoA ligase [ <i>Cystobacter sp. Cbv34</i> ], WP_147447000.1                           | 61%         |

**Supplementary Table S6. PABA34 biosynthetic gene cluster analysis**

| Orf | Gene Size (bp) | Gene Name | Proposed Function           | Protein [Organism], Accession Number                                                             | Protein ID% |
|-----|----------------|-----------|-----------------------------|--------------------------------------------------------------------------------------------------|-------------|
| 1   | 603            | P34A      | Self-resistance protein     | Pentapeptide repeat-containing protein [ <i>Raoultella sp. 18102</i> ], WP_159896252.1           | 59%         |
| 2   | 843            | P34B      | Unknown                     | Hypothetical protein [ <i>Pandoraea cepalis</i> ], WP_174975302.1                                | 42%         |
| 3   | 561            | P34C      | PABA biosynthesis           | Chorismate lyase [ <i>Chryseobacterium nakagawai</i> ], ROS09722.1                               | 43%         |
| 4   | 1374           | P34D      | Dioxygenation of PABA       | Phenylacetate-CoA oxygenase [ <i>Coralloccoccus sp. CA054B</i> ], WP_120590332.1                 | 58%         |
| 5   | 924            | P34E      | Hydroxylation of PABA       | Alpha/beta hydrolase [ <i>Xanthomonas sp. MUS 060</i> ], WP_045739213.1                          | 48%         |
| 6   | 216            | P34F      | A domain activation         | Mbth family protein [ <i>Nonomurea solani</i> ], WP_103963622.1                                  | 52%         |
| 7   | 2236           | P34G      | PABA biosynthesis           | Aminodeoxychorismate synthase component I [ <i>Coralloccoccus sp. CA054B</i> ], WP_120590333.1   | 59%         |
| 8   | 804            | P34H      | NRPS                        | Thioesterase [ <i>Cystobacter ferrugineus</i> ], WP_071903899.1                                  | 52%         |
| 9   | 1023           | P34I      | O-methyltransferase of PABA | Methyltransferase domain-containing protein [ <i>Coralloccoccus sp. CA054B</i> ], WP_120590334.1 | 75%         |
| 10  | 3828           | P34J      | NRPS                        | Non-ribosomal peptide synthetase [ <i>Cystobacter ferrugineus</i> ], WP_071903897.1              | 55%         |
| 11  | 2055           | P34K      | NRPS                        | Non-ribosomal peptide synthetase [ <i>Coralloccoccus sp. CA054B</i> ], WP_147447276.1            | 46%         |
| 12  | 1416           | P34M      | NRPS                        | Non-ribosomal peptide synthetase [ <i>Coralloccoccus sp. CA054B</i> ], WP_120591726.1            | 55%         |
| 13  | 18693          | P34N      | PKS/NRPS                    | Polyketide synthase [ <i>Bacillus sp. BSC154</i> ], KFI01609.1                                   | 39%         |
| 14  | 1602           | P34O      | Unknown                     | Benzoate-CoA ligase [ <i>Cystobacter sp. Cbv34</i> ], AKP45400.1                                 | 47%         |
| 15  | 1455           | P34P      | Transporter                 | MFS transporter [ <i>Coralloccoccus sp. CA054B</i> ], WP_158616558.1                             | 48%         |

**Supplementary Table S7. PABA157 biosynthetic gene cluster analysis**

| Orf | Gene Size (bp) | Gene Name | Proposed Function                  | Protein [Organism], Accession Number                                                                      | Protein ID% |
|-----|----------------|-----------|------------------------------------|-----------------------------------------------------------------------------------------------------------|-------------|
| 1   | 783            | P157A     | PABA biosynthesis                  | 4-amino-4-deoxychorismate lyase [ <i>Caulobacteriales bacterium 32-69-10</i> ], OYX29862.1                | 55%         |
| 2   | 1170           | P157B     | PABA biosynthesis                  | 3-deoxy-7-phosphoheptulonate synthase class II [ <i>Caulobacter sp. 17J65-9</i> ], WP_163259901.1         | 49%         |
| 3   | 2163           | P157C     | PABA biosynthesis                  | Aminodeoxychorismate synthase component I [ <i>Xanthomonas sp. MUS 060</i> ], WP_052688199.1              | 63%         |
| 4   | 801            | P157D     | NRPS                               | Thioesterase [ <i>Cystobacter ferrugineus</i> ], WP_071903899.1                                           | 48%         |
| 5   | 792            | P157E     | O-methyltransferase of hydroxy-Asn | SAM-dependent methyltransferase [ <i>Xanthomonas sp. MUS 060</i> ], WP_161795442.1                        | 61%         |
| 6   | 1932           | P157F     | Unknown                            | Putative benzoate--coa ligase protein [ <i>Xanthomonas albilineans GPE PC73</i> ], CBA16029.1             | 54%         |
| 7   | 993            | P157G     | Hydroxylation of Asn               | TauD/TfdA family dioxygenase [ <i>Xanthomonas sp. MUS 060</i> ], WP_082065178.1                           | 67%         |
| 8   | 5076           | P157H     | NRPS                               | Non-ribosomal peptide synthetase [ <i>Xanthomonas albilineans</i> ], WP_080928093.1                       | 56%         |
| 9   | 483            | P157I     | PABA biosynthesis                  | Chorismate lyase [ <i>Trinickia caryophylli</i> ], WP_085230263.1                                         | 56%         |
| 10  | 690            | P157J     | PABA biosynthesis                  | 4-phosphopantetheinyl transferase superfamily protein [ <i>Luteibacter sp. Sphag1AF</i> ], WP_183423732.1 | 46%         |
| 11  | 17934          | P157K     | PKS/NRPS                           | Polyketide non-ribosomal peptide synthase [ <i>Xanthomonas albilineans</i> ], CAE52339.1                  | 57%         |
| 12  | 1032           | P157M     | O-methyltransferase of PABA        | Methyltransferase domain-containing protein [ <i>Xanthomonas sp. MUS 060</i> ], WP_045739310.1            | 70%         |
| 13  | 567            | P157N     | Thioesterase                       | Thioesterase [ <i>Xanthomonas</i> ], WP_012916037.1                                                       | 60%         |
| 14  | 2871           | P157O     | NRPS                               | Non-ribosomal peptide synthase [ <i>Xanthomonas albilineans</i> ], CAE52342.1                             | 64%         |
| 15  | 225            | P157P     | A domain activation                | MbtH family NRPS accessory protein [ <i>Actinophytocola oryzae</i> ], WP_133900845.1                      | 73%         |
| 16  | 927            | P157Q     | Hydroxylation of PABA              | Alpha/beta hydrolase [ <i>Xanthomonas albilineans</i> ], WP_045767479.1                                   | 56%         |
| 17  | 1368           | P157R     | Dioxygenation of PABA              | Phenylacetate-CoA oxygenase subunit Paal [ <i>Corallococcus sp. CA054B</i> ], WP_120590332.1              | 57%         |
| 18  | 951            | P157S     | Hydroxylation of PABA              | Alpha/beta fold hydrolase [ <i>Xanthomonas sp. MUS 060</i> ], WP_045739211.1                              | 59%         |
| 19  | 1626           | P157T     | Transporter                        | MFS transporter [ <i>Xanthomonas albilineans</i> ], WP_080928090.1                                        | 53%         |
| 20  | 759            | P157U     | Self-resistance protein            | Pentapeptide repeat-containing protein [ <i>Bradyrhizobium sp. BTai1</i> ], WP_011942600.1                | 41%         |

**Supplementary Table S8. PABA95 biosynthetic gene cluster analysis**

| Orf | Gene Size (bp) | Gene Name | Proposed Function           | Protein [Organism], Accession Number                                                               | Protein ID% |
|-----|----------------|-----------|-----------------------------|----------------------------------------------------------------------------------------------------|-------------|
| 1   | 678            | P95A      | PABA biosynthesis           | Aminodeoxychorismate synthase component I [ <i>Xanthomonas sp. MUS 060</i> ], WP_052688199.1       | 74%         |
| 2   | 777            | P95B      | Thioesterase                | Thioesterase [ <i>Cystobacter ferrugineus</i> ], WP_071903899.1                                    | 59%         |
| 3   | 1035           | P95C      | O-methyltransferase of PABA | Methyltransferase domain-containing protein [ <i>Cystobacter ferrugineus</i> ], WP_071903898.1     | 70%         |
| 4   | 5979           | P95D      | NRPS                        | Non-ribosomal peptide synthase [ <i>Cystobacter sp. Cbv34</i> ], AKP45395.1                        | 54%         |
| 5   | 2781           | P95E      | NRPS                        | Non-ribosomal peptide synthase [ <i>Cystobacter sp. Cbv34</i> ], AKP45396.1                        | 65%         |
| 6   | 819            | P95F      | PABA biosynthesis           | Aminodeoxychorismate lyase [ <i>Cystobacter ferrugineus</i> ], WP_071903895.1                      | 53%         |
| 7   | 1392           | P95G      | PKS                         | Acyltransferase [ <i>Ketobacter sp.</i> ], RLU01354.1                                              | 31%         |
| 8   | 978            | P95H      | Hydroxylation of Asn        | TauD/TfdA family dioxygenase [ <i>Cystobacter ferrugineus</i> ], WP_071903894.1                    | 68%         |
| 9   | 2238           | P95I      | PKS/NRPS                    | Polyketide non-ribosomal peptide synthase [ <i>Xanthomonas albilineans GPE PC73</i> ], CBA16032.1  | 42%         |
| 10  | 3441           | P95J      | PKS                         | SDR family NAD(P)-dependent oxidoreductase [ <i>Sporocytophaga myxococcoides</i> ], WP_051313368.1 | 54%         |
| 11  | 3519           | P95K      | PKS                         | SDR family NAD(P)-dependent oxidoreductase [ <i>Bacillus subtilis</i> ], WP_148343064.1            | 42%         |
| 12  | 10890          | P95M      | NRPS                        | Non-ribosomal peptide synthase [ <i>Cystobacter sp. Cbv34</i> ], AKP45399.2                        | 53%         |
| 13  | 756            | P95N      | Unknown                     | Benzoate-CoA ligase [ <i>Cystobacter sp. Cbv34</i> ], AKP45400.1                                   | 32%         |

**Supplementary Table S9. Albicidin 10 signature code analysis**

| Module | A domain signature |     |     |     |     |     |     |     |     |     | Predicted substrate |
|--------|--------------------|-----|-----|-----|-----|-----|-----|-----|-----|-----|---------------------|
|        | 235                | 236 | 239 | 278 | 299 | 301 | 322 | 330 | 331 | 517 |                     |
| A      | PKS                |     |     |     |     |     |     |     |     |     | MCA                 |
| B      | A                  | V   | K   | Y   | V   | A   | N   | D   | A   | K   | PABA                |
| *      | E                  | L   | T   | Y   | V   | H   | V   | A   | A   | K   | inactive            |
| C      | D                  | L   | T   | K   | I   | G   | E   | V   | G   | K   | Asn                 |
| D      | A                  | V   | K   | Y   | V   | A   | N   | D   | A   | K   | PABA                |
| E      | A                  | I   | K   | Y   | F   | S   | I   | D   | M   | K   | AHIBA               |
| F      | A                  | I   | K   | Y   | F   | S   | I   | D   | M   | K   | AHIBA               |

**Supplementary Table S10. Cystobactamid 10 signature code analysis**

| Module | A domain signature |     |     |     |     |     |     |     |     |     | Predicted substrate |
|--------|--------------------|-----|-----|-----|-----|-----|-----|-----|-----|-----|---------------------|
|        | 235                | 236 | 239 | 278 | 299 | 301 | 322 | 330 | 331 | 517 |                     |
| A      | A                  | V   | K   | H   | I   | A   | N   | D   | V   | K   | PABA                |
| B      | A                  | V   | K   | H   | I   | A   | N   | D   | V   | K   | PABA                |
| *      | D                  | L   | A   | Y   | F   | G   | V   | I   | G   | K   | inactive            |
| C      | D                  | L   | T   | K   | I   | G   | E   | V   | G   | K   | Asn                 |
| D      | A                  | V   | K   | H   | I   | A   | N   | D   | V   | K   | PABA                |
| E      | A                  | I   | K   | Y   | Y   | S   | I   | D   | V   | K   | AHMBA               |
| F      | A                  | I   | K   | Y   | I   | A   | N   | D   | I   | K   | PABA                |

**Supplementary Table S11. PABA48 10 signature code analysis**

| Module | A domain signature |     |     |     |     |     |     |     |     |     | Predicted substrate |
|--------|--------------------|-----|-----|-----|-----|-----|-----|-----|-----|-----|---------------------|
|        | 235                | 236 | 239 | 278 | 299 | 301 | 322 | 330 | 331 | 517 |                     |
| A      | D                  | A   | W   | T   | I   | A   | A   | V   | C   | K   | Phe                 |
| B      | A                  | V   | K   | H   | I   | A   | N   | D   | V   | K   | PABA                |
| *      | D                  | L   | A   | Y   | F   | G   | V   | I   | G   | K   | inactive            |
| C      | D                  | L   | T   | K   | I   | G   | E   | V   | G   | K   | Asn                 |
| D      | A                  | V   | K   | H   | I   | A   | N   | D   | V   | K   | PABA                |
| E      | A                  | I   | K   | Y   | F   | S   | I   | D   | V   | K   | AHIBA               |
| F      | A                  | I   | K   | Y   | I   | A   | N   | D   | I   | K   | AHIBA               |

**Supplementary Table S12. PABA70 10 signature code analysis**

| Module | A domain signature |     |     |     |     |     |     |     |     |     | Predicted substrate |
|--------|--------------------|-----|-----|-----|-----|-----|-----|-----|-----|-----|---------------------|
|        | 235                | 236 | 239 | 278 | 299 | 301 | 322 | 330 | 331 | 517 |                     |
| A      | D                  | A   | A   | T   | I   | A   | A   | V   | C   | K   | Tyr                 |
| B      | A                  | V   | K   | Y   | V   | A   | N   | D   | V   | K   | PABA                |
| *      | E                  | L   | A   | Y   | F   | G   | I   | I   | G   | K   | inactive            |
| C      | D                  | L   | T   | K   | I   | G   | E   | V   | G   | K   | Asn                 |
| D      | A                  | V   | K   | Y   | V   | A   | N   | D   | V   | K   | PABA                |
| E      | A                  | I   | K   | Y   | F   | S   | I   | D   | V   | K   | AHIBA               |
| F      | A                  | I   | K   | C   | F   | S   | I   | D   | I   | K   | AHIBA               |

**Supplementary Table S13. PABA57 10 signature code analysis**

| Module | A domain signature |     |     |     |     |     |     |     |     |     | Predicted substrate |
|--------|--------------------|-----|-----|-----|-----|-----|-----|-----|-----|-----|---------------------|
|        | 235                | 236 | 239 | 278 | 299 | 301 | 322 | 330 | 331 | 517 |                     |
| A      | D                  | A   | A   | T   | I   | A   | A   | V   | C   | K   | Tyr                 |
| B      | A                  | V   | K   | H   | I   | A   | N   | D   | I   | K   | PABA                |
| *      | D                  | L   | A   | H   | F   | G   | T   | I   | G   | K   | inactive            |
| C      | D                  | L   | T   | K   | I   | G   | E   | V   | G   | K   | Asn                 |
| D      | A                  | V   | K   | H   | I   | A   | N   | D   | I   | K   | PABA                |
| E      | A                  | I   | K   | Y   | F   | S   | I   | D   | I   | K   | AHIBA               |
| F      | A                  | V   | K   | H   | I   | A   | N   | D   | I   | K   | PABA                |

**Supplementary Table S14. PABA34 10 signature code analysis**

| Module | A domain signature |     |     |     |     |     |     |     |     |     | Predicted substrate |
|--------|--------------------|-----|-----|-----|-----|-----|-----|-----|-----|-----|---------------------|
|        | 235                | 236 | 239 | 278 | 299 | 301 | 322 | 330 | 331 | 517 |                     |
| A      | PKS                |     |     |     |     |     |     |     |     |     | MCA                 |
| B      | A                  | V   | K   | H   | V   | A   | N   | D   | V   | K   | PABA                |
| *      | D                  | I   | I   | I   | L   | A   | I   | E   | I   | K   | inactive            |
| C      | D                  | L   | T   | K   | I   | G   | E   | V   | G   | K   | Asn                 |
| D      | A                  | I   | K   | Y   | F   | S   | I   | D   | M   | K   | AHMBA               |
| E      | A                  | I   | K   | Y   | F   | S   | I   | D   | M   | K   | AHMBA               |
| F      | A                  | V   | K   | H   | V   | A   | N   | D   | V   | K   | PABA                |



**Supplementary Table S15. PABA157 10 signature code analysis**

| Module | A domain signature |     |     |     |     |     |     |     |     |     | Predicted substrate |
|--------|--------------------|-----|-----|-----|-----|-----|-----|-----|-----|-----|---------------------|
|        | 235                | 236 | 239 | 278 | 299 | 301 | 322 | 330 | 331 | 517 |                     |
| A      | PKS                |     |     |     |     |     |     |     |     |     | CA                  |
| B      | A                  | V   | K   | F   | V   | A   | N   | D   | V   | K   | PABA                |
| *      | G                  | L   | L   | S   | E   | H   | V   | H   | F   | K   | inactive            |
| C      | D                  | L   | T   | K   | I   | G   | E   | V   | G   | K   | Asn                 |
| D      | A                  | V   | K   | F   | V   | A   | N   | D   | V   | K   | AHMBA               |
| E      | A                  | I   | K   | Y   | F   | S   | I   | D   | I   | K   | AHMBA               |
| F      | A                  | V   | K   | F   | V   | A   | N   | D   | V   | K   | PABA                |

**Supplementary Table S16. PABA95 10 signature code analysis**

| Module | A domain signature |     |     |     |     |     |     |     |     |     | Predicted substrate |
|--------|--------------------|-----|-----|-----|-----|-----|-----|-----|-----|-----|---------------------|
|        | 235                | 236 | 239 | 278 | 299 | 301 | 322 | 330 | 331 | 517 |                     |
| PKS    |                    |     |     |     |     |     |     |     |     |     | MCA                 |
| B      | A                  | I   | K   | Y   | F   | S   | I   | D   | I   | K   | AHMBA               |
| *      | D                  | V   | I   | Y   | L   | G   | A   | L   | G   | K   | inactive            |
| C      | D                  | L   | T   | K   | I   | G   | E   | V   | G   | K   | Asn                 |
| D      | A                  | V   | K   | H   | I   | A   | N   | D   | V   | K   | PABA                |
| E      | A                  | I   | K   | Y   | F   | S   | I   | D   | V   | K   | AHMBA               |
| F      | A                  | V   | K   | F   | V   | A   | N   | D   | V   | K   | PABA                |

**Supplementary Table S17.** Resistance frequency of syn-BNPs and ciprofloxacin against *E. coli* 25922 in the presence of 2 x MIC antibiotic.

| Compounds     | Frequency             |
|---------------|-----------------------|
| Albicidin     | $7.80 \times 10^{-7}$ |
| PABA48        | $3.50 \times 10^{-7}$ |
| PABA70        | $3.25 \times 10^{-7}$ |
| PABA57        | $4.25 \times 10^{-7}$ |
| PABA34        | $6.67 \times 10^{-7}$ |
| PABA157       | $4.50 \times 10^{-7}$ |
| PABA95        | $3.62 \times 10^{-7}$ |
| Ciprofloxacin | $4.50 \times 10^{-8}$ |

Supplementary Figure S1. Proposed PABA48 biosynthetic pathway

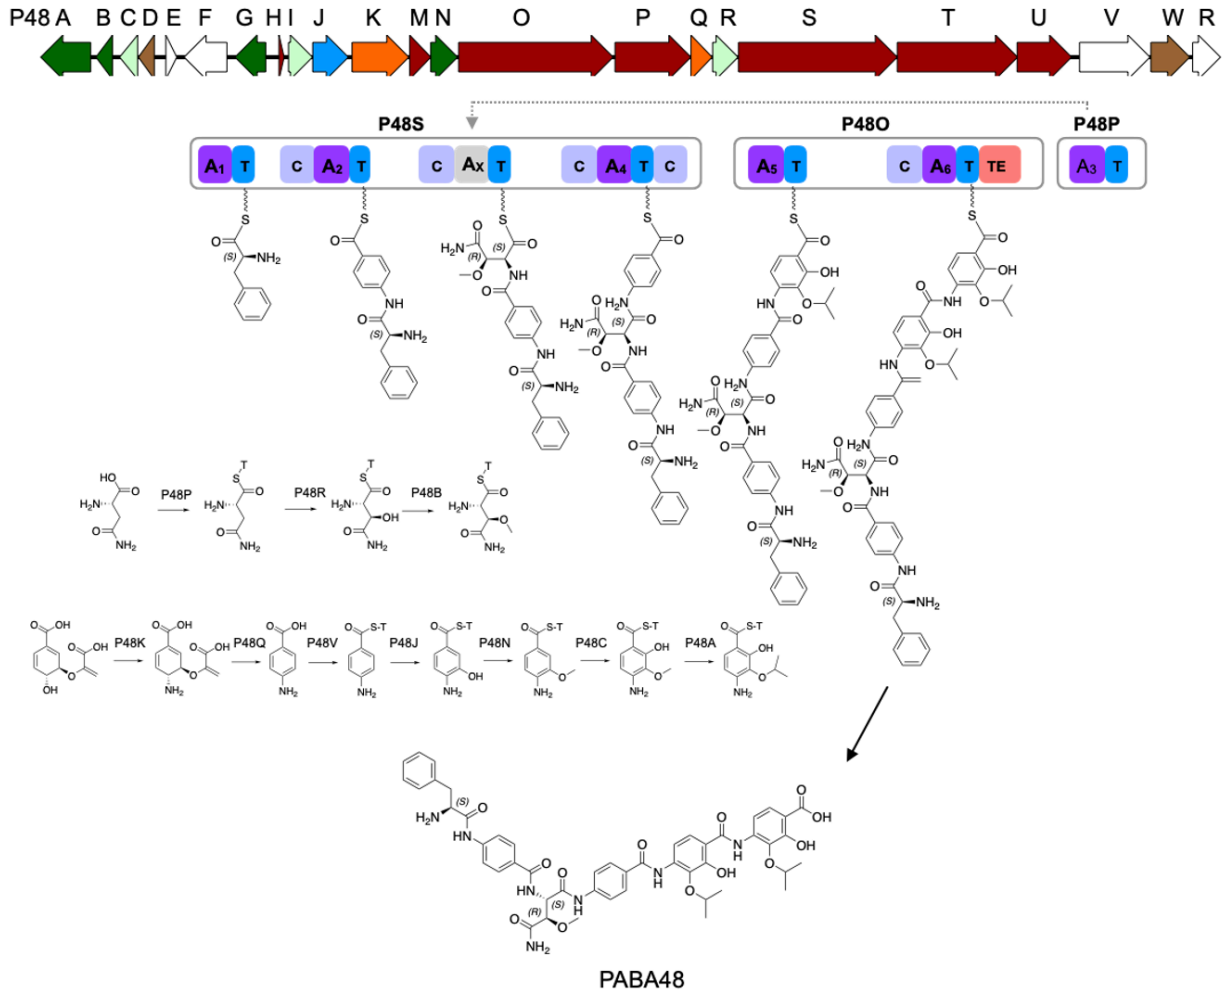

Supplementary Figure S2. Proposed PABA70 biosynthetic pathway

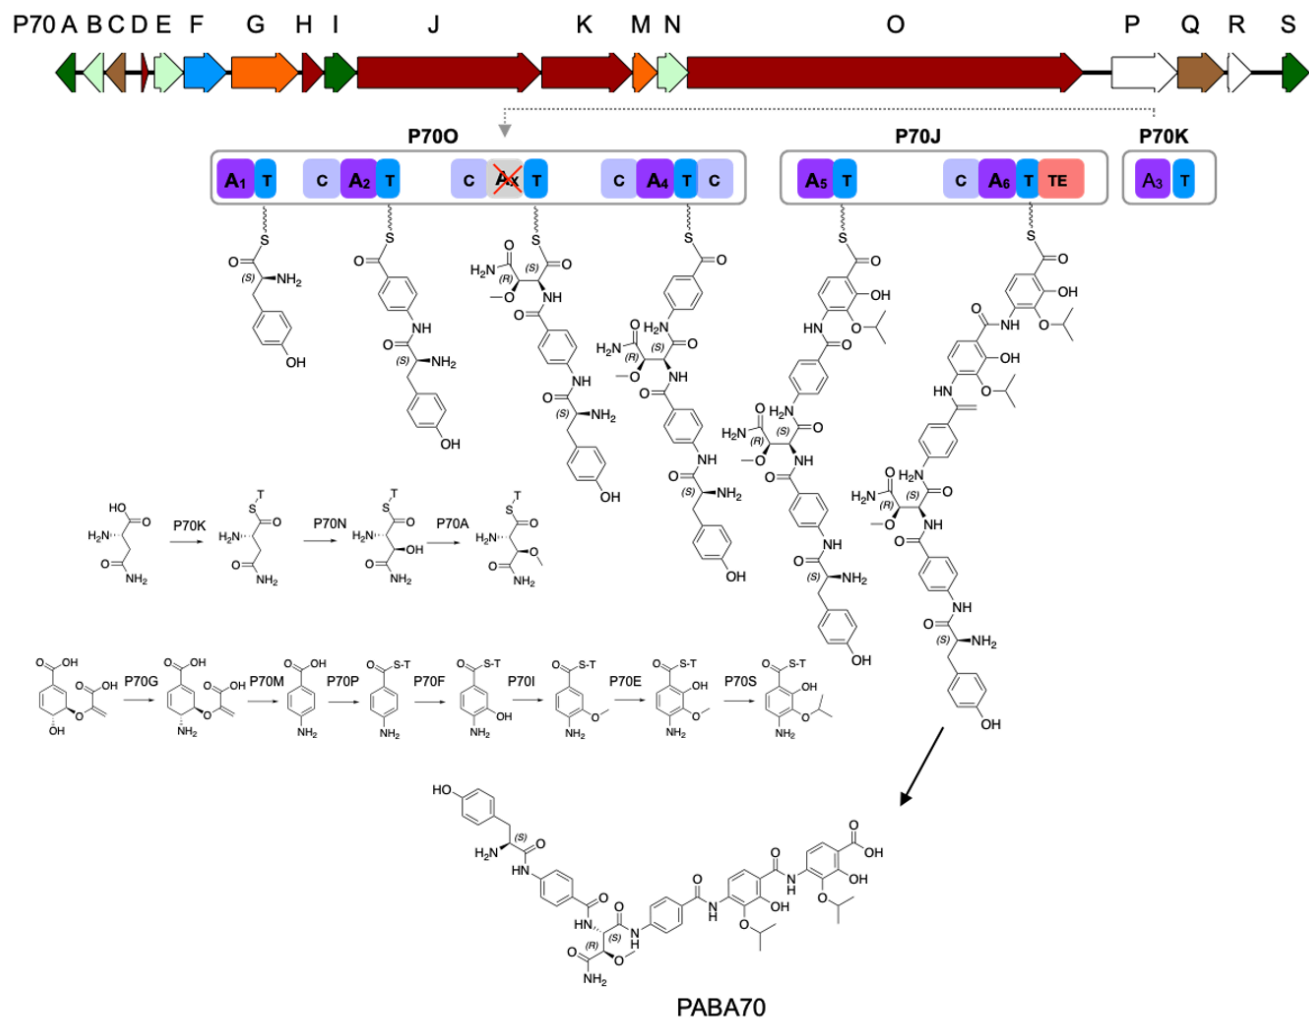

Supplementary Figure S3. Proposed PABA57 biosynthetic pathway

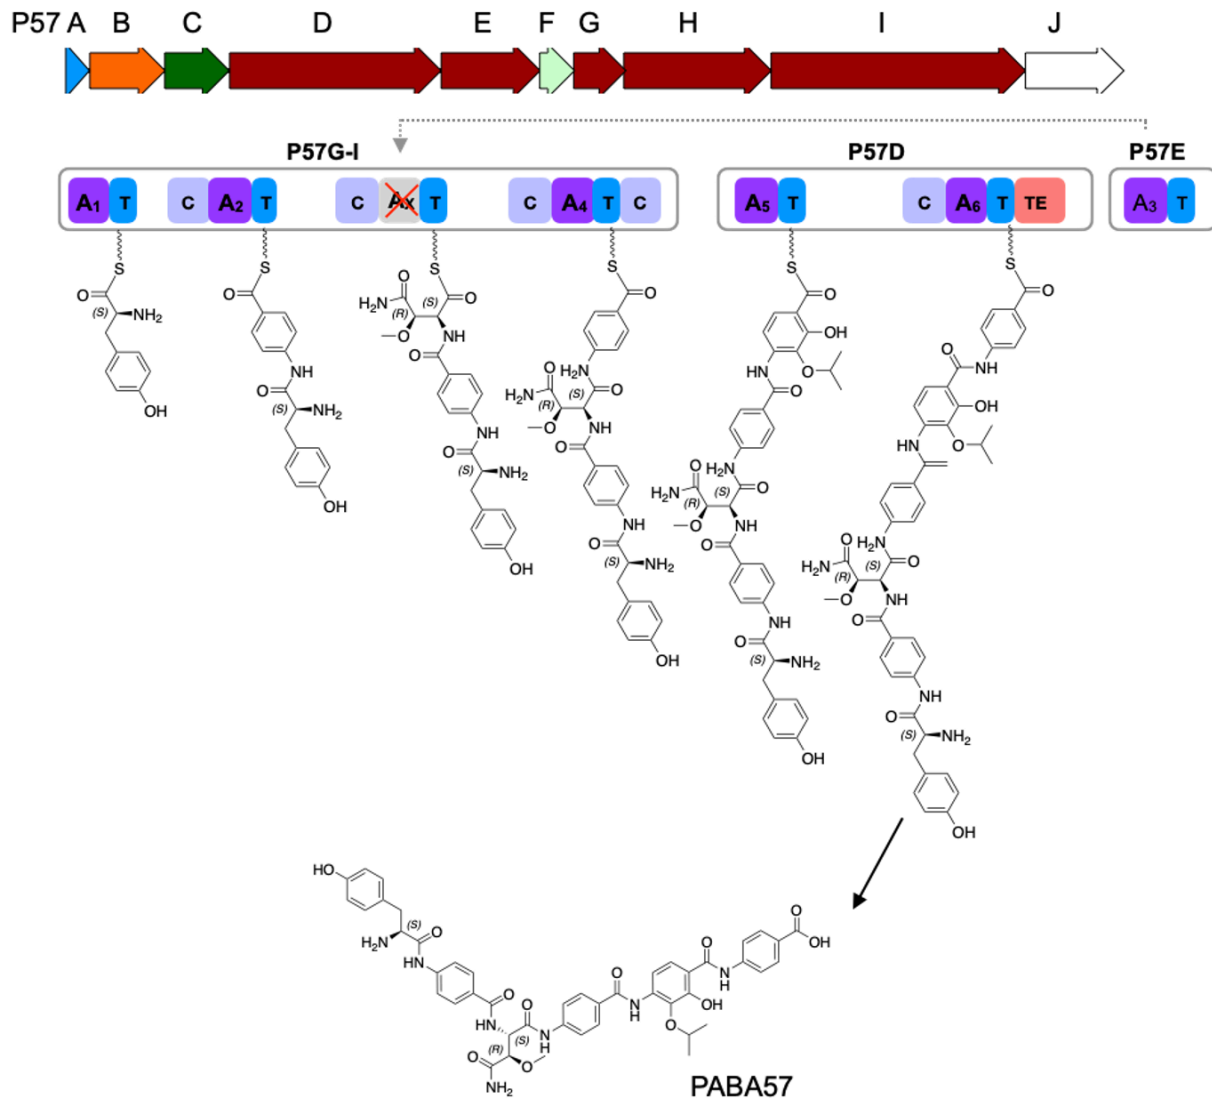

Supplementary Figure S4. Proposed PABA34 biosynthetic pathway

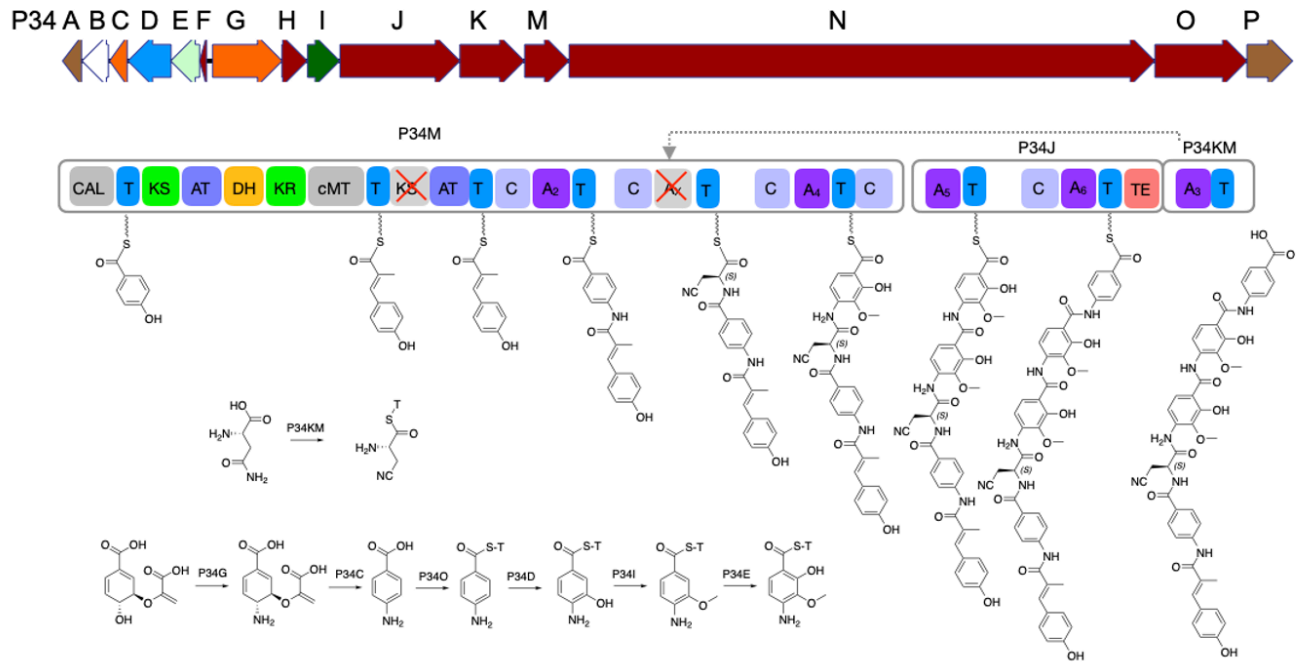

Supplementary Figure S5. Proposed PABA157 biosynthetic pathway

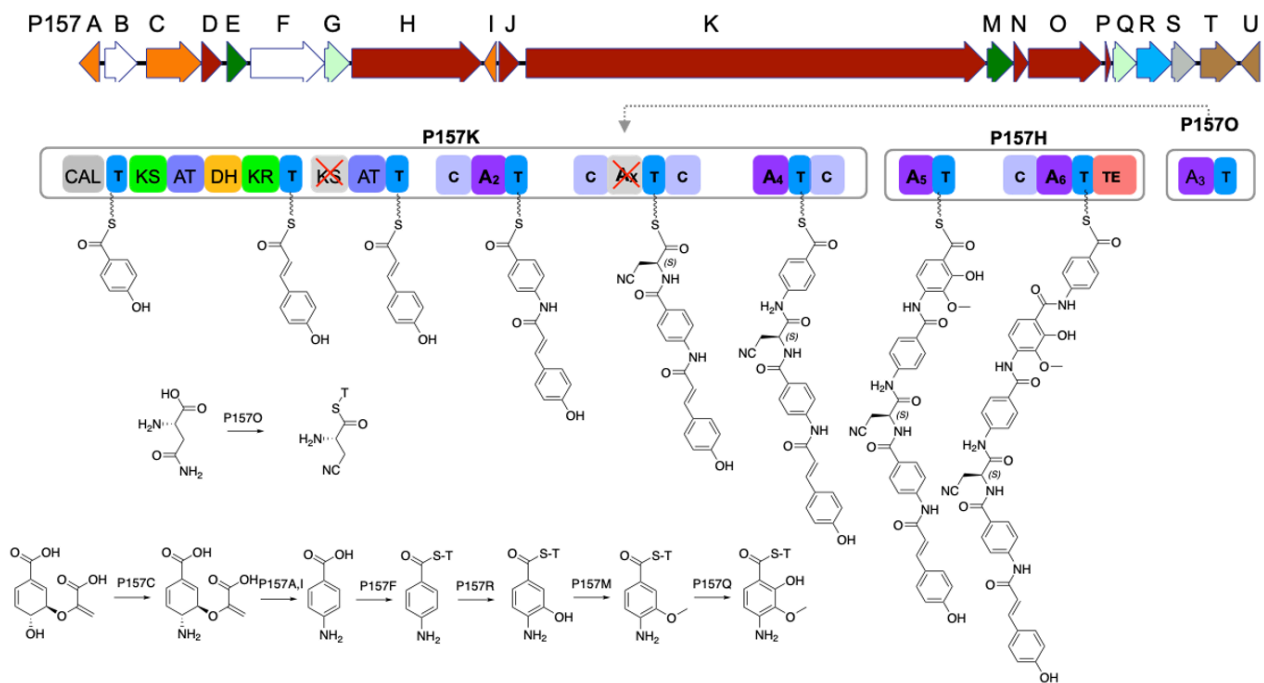

Supplementary Figure S6. Proposed PABA95 biosynthetic pathway

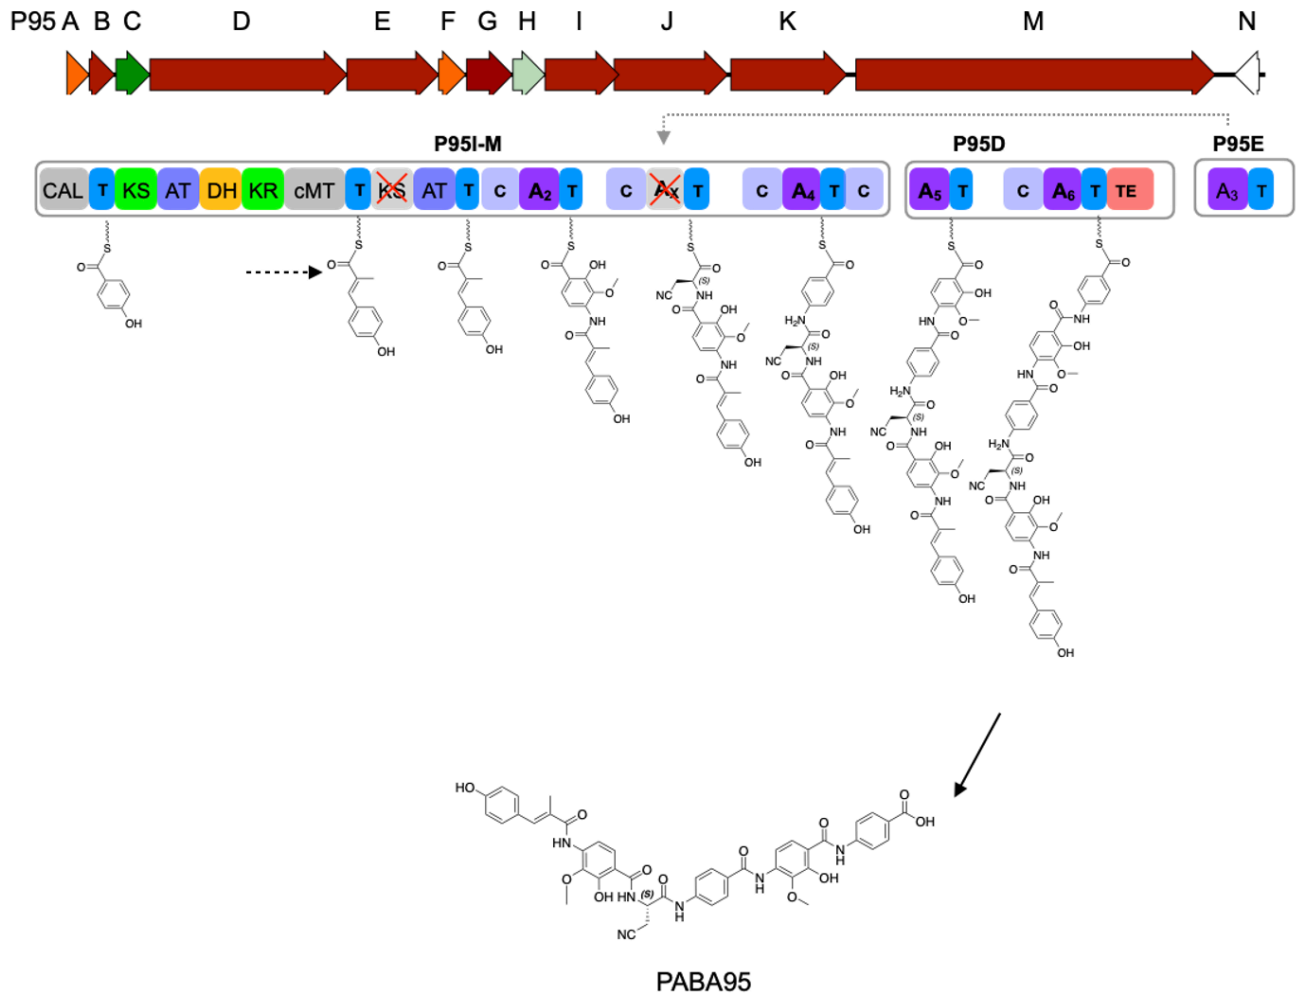



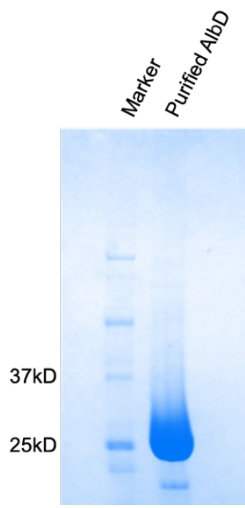

**Supplementary Figure S7:** SDS-PAGE analysis of purified AlbD protein.

**Supplementary Figure S8:** DNA gyrase supercoiling assay with PABA syn-BNPs or ciprofloxacin (CIP) at the concentrations indicated.

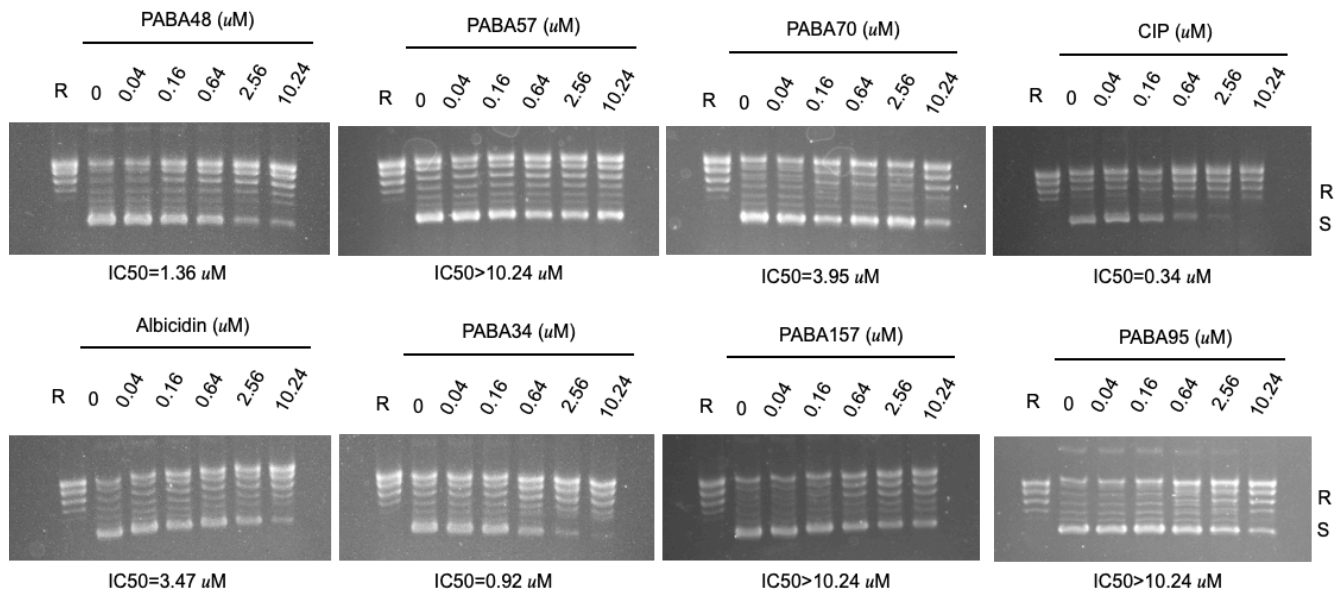

**Supplementary Figure S9:** Time-dependent killing curves. An exponential culture of *E. coli* 25922 was challenged with 10 x MIC of a syn-BNP antibiotic or ciprofloxacin (n=3). Data are mean  $\pm$  s.d. c.f.u. colony-forming units.

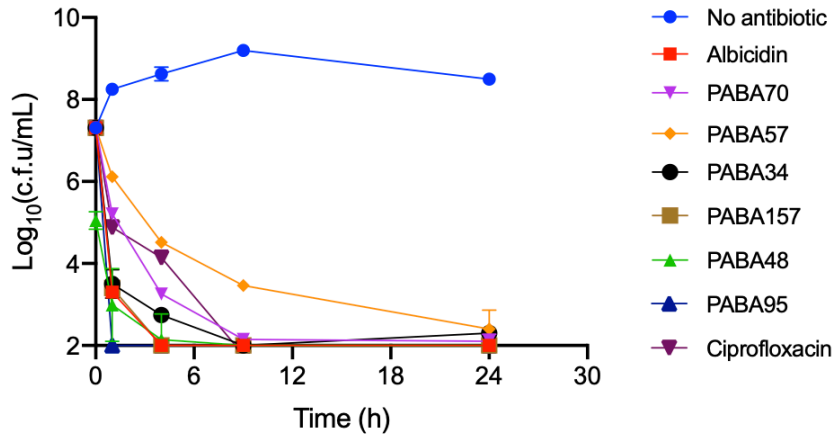

**Supplementary Figure S10:** Resistance after serial passage. Cultures of *E. coli* were passaged in the presence of sub-MIC levels of each syn-BNP antibiotic. The MIC of single colony after each day is shown.

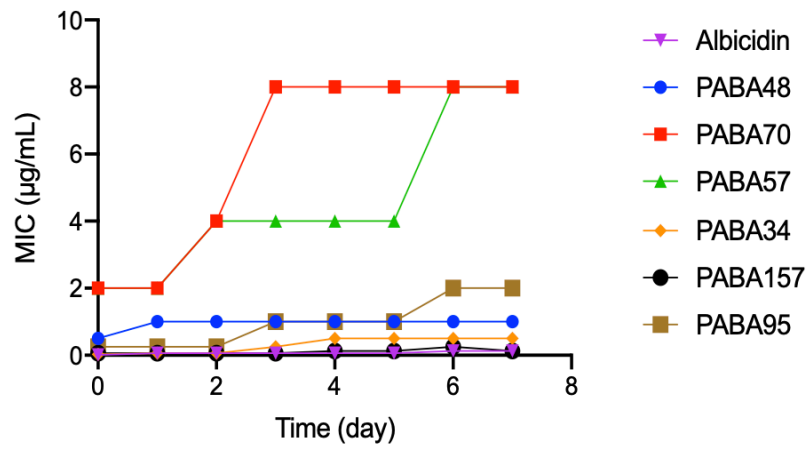

Synthetic procedures:

Total synthesis of PABA48

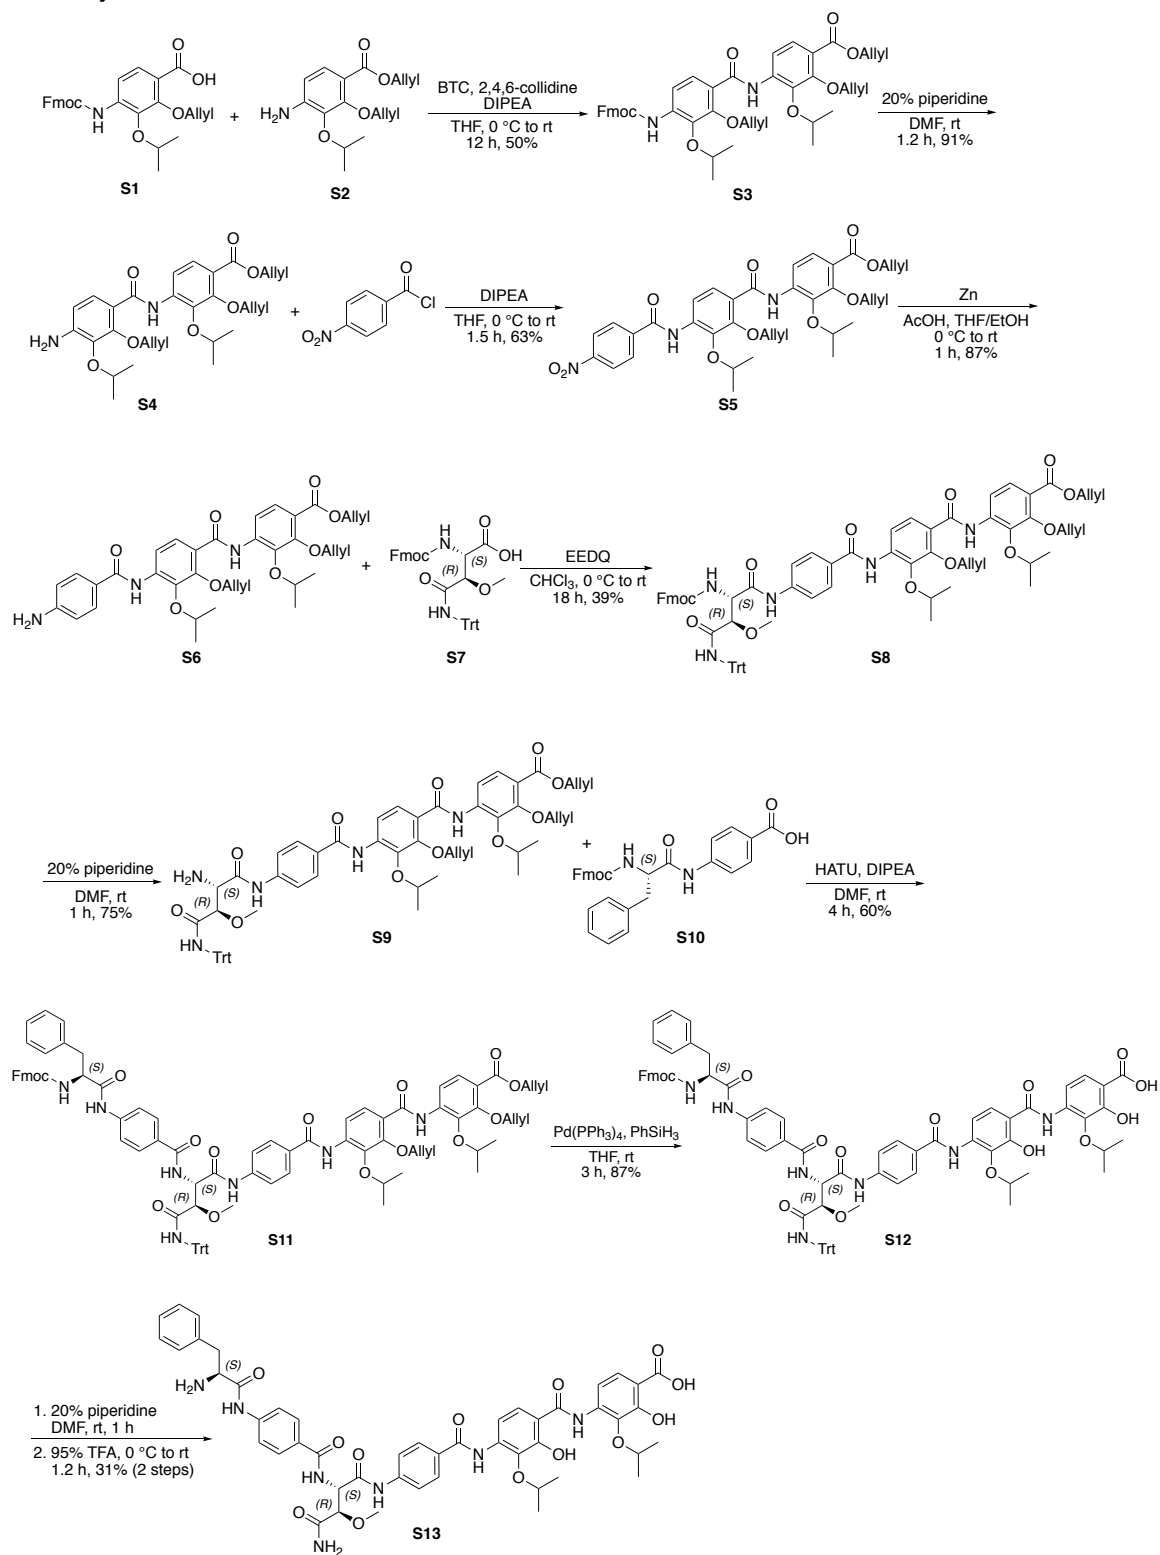

Scheme S1. Synthetic pathway for the preparation of PABA48 (S13).

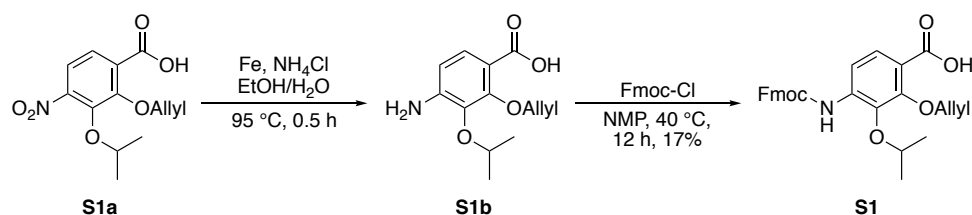

Building block 2-(allyloxy)-3-isopropoxy-4-nitrobenzoic acid (**S1a**) was prepared according to previously reported protocols.<sup>[13]</sup>

Compound **S1a** (1.10 g, 3.91 mmol) was dissolved in EtOH (20.0 mL) followed by the addition of Fe (655 mg, 11.7 mmol). A solution of NH<sub>4</sub>Cl (1.26 g, 23.5 mmol) dissolved in H<sub>2</sub>O (6.00 mL) was added and the reaction was warmed to 95 °C. After stirring at 95 °C for 0.5 h, the solution was cooled to 70 °C, filtered and the residue washed with EtOH (100 mL). The EtOH was removed *in vacuo* resulting in a brown solid. The crude product (1.80 g) was used in the next step without further purification.

To a solution of compound **S1b** (1.80 g, 3.58 mmol) in NMP (35.0 mL), Fmoc-Cl (926 mg, 3.58 mmol) dissolved in NMP (15.0 mL) was added. The mixture was warmed to 40 °C and stirred for 12 h. After quenching with H<sub>2</sub>O, the pH was adjusted to 5 with 0.5 M HCl. The aqueous layer was extracted with EtOAc (3x) followed by washing of the organic layers with brine (1x) and drying over Na<sub>2</sub>SO<sub>4</sub>. After concentrating *in vacuo*, the crude material was purified via RP-HPLC (45%-85%, ACN/H<sub>2</sub>O). Compound **S1** (300 mg, 17%) was obtained as an off-white solid.

<sup>1</sup>H NMR (400 MHz, DMSO-*d*<sub>6</sub>) δ 8.83 (s, 1H), 7.91 (d, *J* = 7.50 Hz, 2H), 7.77 (d, *J* = 7.26 Hz, 2H), 7.53 (d, *J* = 9.04 Hz, 1H), 7.44 (q, *J* = 7.20 Hz, 3H), 7.34 (t, *J* = 7.20 Hz, 2H), 6.01–6.12 (m, 1H), 5.37 (d, *J* = 17.4 Hz, 1H), 5.23 (d, *J* = 9.71 Hz, 1H), 4.50 (d, *J* = 5.29 Hz, 2H), 4.38–4.45 (m, 3H), 4.33 (t, *J* = 6.80 Hz, 1H), 2.58 (s, 3H), 1.23 (d, *J* = 6.17 Hz, 6H); ESI-MS [*M* - H]<sup>-</sup>: *m/z* 472.17

#### Allyl 2-(allyloxy)-4-amino-3-isopropoxybenzoate (**S2**)

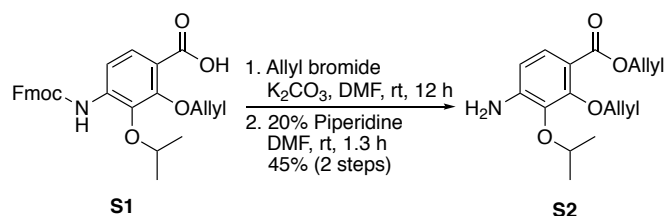

**S1** (110 mg, 0.232 mmol) was dissolved in dry DMF (1.10 mL) followed by the addition of allyl bromide (21.1 μL, 0.303 mmol) and K<sub>2</sub>CO<sub>3</sub> (19.2 mg, 0.139 mmol). The reaction was stirred at room temperature for 18 h under Ar(g). Et<sub>2</sub>O (10.0 mL) and H<sub>2</sub>O (10.0 mL) were added, and the organic layer was then washed with saturated NaHCO<sub>3</sub> (2x), brine (1x), and dried over Na<sub>2</sub>SO<sub>4</sub>. Crude material was purified via flash column chromatography with a gradient of 0-20% EtOAc in hexanes to afford a mixture of deprotected intermediates as a clear oil.

The mixture (59.9 mg, 0.117 mmol) was dissolved in dry DMF (1.48 mL) followed by the addition of piperidine (0.370 mL). The reaction stirred at room temperature under Ar(g) for 1 h and quenched with a saturated solution of NH<sub>4</sub>Cl. The mixture was extracted with DCM (3x) followed by washing of the organic layers with saturated NaHCO<sub>3</sub> (1x) before drying over Na<sub>2</sub>SO<sub>4</sub> and concentrating *in vacuo*. Crude material was purified via flash column chromatography with a gradient of 0-20% EtOAc in hexanes to afford deprotected dimer **S2** as a clear oil (30.4 mg, 0.104 mmol, 45% over 2 steps).

<sup>1</sup>H NMR (600 MHz, CDCl<sub>3</sub>) δ 7.52 (d, *J* = 8.6 Hz, 1H), 6.47 (d, *J* = 8.6 Hz, 1H), 6.14 (ddt, *J* = 16.5, 11.0, 5.9 Hz, 1H), 6.03 (ddt, *J* = 16.4, 10.9, 5.7 Hz, 1H), 5.37 (ddd, *J* = 17.4, 13.3, 2.0 Hz, 2H), 5.23 (dd, *J* = 15.5, 10.4 Hz, 2H), 4.76 (d, *J* = 5.8 Hz, 2H), 4.66 (hept, *J* = 6.3 Hz, 1H), 4.53 (d, *J* = 6.0 Hz, 2H), 4.27 (s, 2H), 1.28 (d, *J* = 6.2 Hz, 6H); ESI-MS [*M* + H]<sup>+</sup>: *m/z* 292.14

#### Allyl 4-(4-(((9H-fluoren-9-yl)methoxy)carbonyl)amino)-2-(allyloxy)-3-isopropoxybenzamido)-2-(allyloxy)-3-isopropoxybenzoate (**S3**)

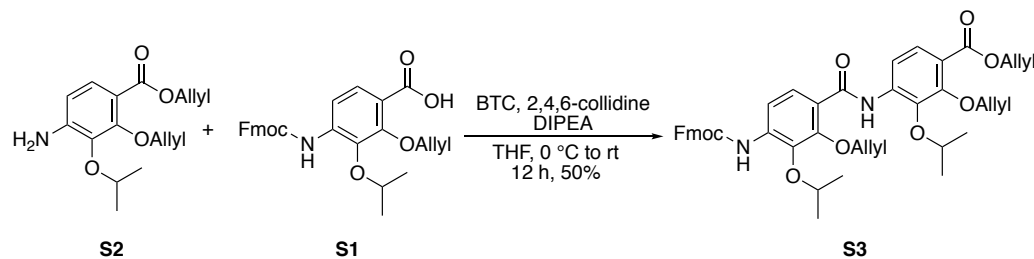

BTC (28.2 mg, 95.0 μmol) and **S1** (135.1 mg, 0.285 mmol) were dissolved in dry THF (0.900 mL) and cooled to 0 °C under Ar(g). To this solution 2,4,6-collidine (252 μL, 1.90 mmol) was added dropwise and the resulting suspension was stirred for 5 min at room temperature. A solution of **S2** (69.3 mg, 0.238 mmol) and DIPEA (414 μL, 1.90 mmol) was prepared under Ar(g) and then added dropwise to the suspension. The reaction was stirred at room temperature overnight. The reaction was diluted with Et<sub>2</sub>O followed by washing with 10 % KHSO<sub>4</sub> (2x). The organic layer was then washed with saturated NaHCO<sub>3</sub> (1x) followed by brine (1x) before drying

over Na<sub>2</sub>SO<sub>4</sub> and concentrating *in vacuo*. Crude material was purified via flash column chromatography with a gradient of 0-20% EtOAc in hexanes to afford dimer **S3** as a clear oil (89.8 mg, 0.120 mmol, 50%).

<sup>1</sup>H NMR (600 MHz, CDCl<sub>3</sub>) δ 10.72 (s, 1H), 8.46 (d, *J* = 8.8 Hz, 1H), 7.93 (d, *J* = 8.1 Hz, 1H), 7.80 (d, *J* = 7.6 Hz, 2H), 7.68 (d, *J* = 8.9 Hz, 1H), 7.63 (d, *J* = 7.5 Hz, 2H), 7.42 (q, *J* = 7.2 Hz, 3H), 7.34 (t, *J* = 7.5 Hz, 2H), 6.20 – 6.00 (m, 3H), 5.40 (dd, *J* = 22.7, 17.2 Hz, 2H), 5.31 – 5.23 (m, 3H), 5.22 (d, *J* = 10.2 Hz, 1H), 4.81 (d, *J* = 5.7 Hz, 2H), 4.76 (h, *J* = 6.2 Hz, 1H), 4.68 (d, *J* = 6.6 Hz, 2H), 4.62 (q, *J* = 6.1 Hz, 1H), 4.58 (d, *J* = 6.3 Hz, 3H), 4.56 (s, 1H), 4.33 (t, *J* = 6.8 Hz, 1H), 1.37 (d, *J* = 6.1 Hz, 6H), 1.28 (d, *J* = 6.2 Hz, 6H); ESI-MS [*M* + *H*]<sup>+</sup>: *m/z* 747.26

#### Allyl 2-(allyloxy)-4-(2-(allyloxy)-4-amino-3-isopropoxybenzamido)-3-isopropoxybenzoate (**S4**)

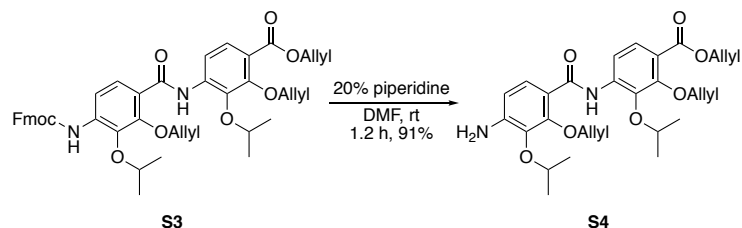

The Fmoc-protected dimer **S3** (88.2 mg, 0.118 mmol) was dissolved in dry DMF (1.60 mL) followed by the addition of piperidine (0.4 mL). The reaction stirred at room temperature under Ar(g) for 1 h and quenched with a saturated solution of NH<sub>4</sub>Cl. The mixture was extracted with DCM (3x) followed by washing of the organic layers with saturated NaHCO<sub>3</sub> (1x) before drying over Na<sub>2</sub>SO<sub>4</sub> and concentrating *in vacuo*. Crude material was purified via flash column chromatography with a gradient of 0-20% EtOAc in hexanes to afford deprotected dimer **S4** as a pale yellow oil (56.3 mg, 0.107 mmol, 91%).

<sup>1</sup>H NMR (600 MHz, CDCl<sub>3</sub>) δ 10.79 (s, 1H), 8.46 (d, *J* = 8.8 Hz, 1H), 7.79 (d, *J* = 8.6 Hz, 1H), 7.65 (d, *J* = 8.8 Hz, 1H), 6.59 (d, *J* = 8.6 Hz, 1H), 6.19 – 6.07 (m, 2H), 6.04 (ddt, *J* = 16.5, 11.0, 5.7 Hz, 1H), 5.39 (dd, *J* = 20.7, 17.2 Hz, 2H), 5.31 – 5.21 (m, 3H), 5.18 (d, *J* = 10.2 Hz, 1H), 4.79 (d, *J* = 5.8 Hz, 2H), 4.73 (p, *J* = 6.2 Hz, 1H), 4.68 (d, *J* = 6.7 Hz, 2H), 4.58 (d, *J* = 6.0 Hz, 2H), 4.59 – 4.51 (m, 1H), 4.25 – 4.19 (brs, 2H), 1.35 (d, *J* = 6.3 Hz, 6H), 1.27 (d, *J* = 6.3 Hz, 6H); ESI-MS [*M* + *H*]<sup>+</sup>: *m/z* 525.29

#### Allyl 2-(allyloxy)-4-(2-(allyloxy)-3-isopropoxy-4-(4-nitrobenzamido)benzamido)-3-isopropoxybenzoate (**S5**)

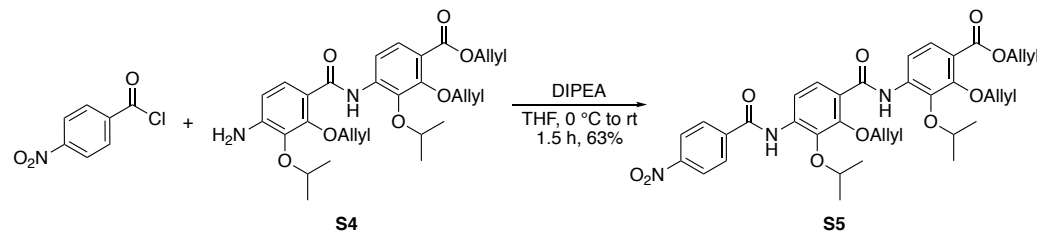

Dimer **S4** (56.3 mg, 0.107 mmol) was dissolved in dry THF (250 μL) followed by the addition of DIPEA (56.0 μL, 0.322 mmol) and cooled to 0 °C under Ar(g). To this solution, 4-nitrobenzoyl chloride (29.9 mg, 0.161 mmol) was added portionwise over 30 min keeping the solution at 0 °C. Once the starting material was consumed, the reaction was allowed to warm to room temperature and stirred for 10 min. Following formation of a precipitate, the reaction was diluted with Et<sub>2</sub>O and stirred at room temperature for 1 h. The precipitate was filtered and washed with Et<sub>2</sub>O. The filtrate and all Et<sub>2</sub>O washes were combined and concentrated *in vacuo*. Crude material was purified via flash column chromatography with a gradient of 0-20% EtOAc in hexanes to afford trimer **S5** as a pale yellow oil (45.2 mg, 67.0 μmol, 63%).

<sup>1</sup>H NMR (600 MHz, CDCl<sub>3</sub>) δ 10.70 (s, 1H), 8.79 (s, 1H), 8.46 (dd, *J* = 8.8, 6.5 Hz, 2H), 8.40 (d, *J* = 8.3 Hz, 2H), 8.08 (d, *J* = 8.4 Hz, 2H), 8.03 (d, *J* = 8.8 Hz, 1H), 7.68 (d, *J* = 8.7 Hz, 1H), 6.19 – 6.00 (m, 3H), 5.40 (dd, *J* = 22.4, 17.2 Hz, 2H), 5.32 – 5.21 (m, 4H), 4.80 (d, *J* = 5.7 Hz, 2H), 4.80 – 4.75 (m, 2H), 4.70 (d, *J* = 6.7 Hz, 2H), 4.58 (d, *J* = 6.0 Hz, 2H), 1.41 (d, *J* = 6.2 Hz, 6H), 1.29 (d, *J* = 6.2 Hz, 6H); ESI-MS [*M* + *H*]<sup>+</sup>: *m/z* 674.27

#### Allyl 2-(allyloxy)-4-(2-(allyloxy)-4-(4-aminobenzamido)-3-isopropoxybenzamido)-3-isopropoxybenzoate (**S6**)

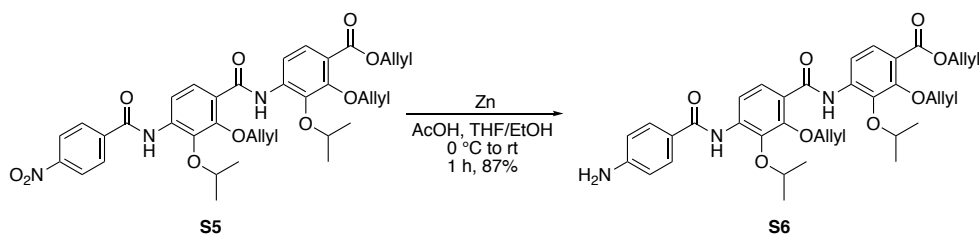

Nitrobenzoate **S5** (18.0 mg, 0.027 mmol) was dissolved in a solution of 10% AcOH in THF/EtOH (4:1, 275  $\mu$ L) and cooled to 0  $^{\circ}$ C. Zinc powder (33.2 mg, 0.508 mmol) was added portionwise and monitored via TLC. The reaction was allowed to warm to room temperature and stirred for 1 h before filtering through Celite<sup>™</sup> and washing with excess DCM as well as a small amount of MeOH. After concentrating *in vacuo*, the crude material was purified via flash column chromatography with a gradient of 0-40% EtOAc in hexanes to afford **S6** as a yellow oil (15.0 mg, 23.0  $\mu$ mol, 87%).

<sup>1</sup>H NMR (600 MHz, CDCl<sub>3</sub>)  $\delta$  10.73 (s, 1H), 8.65 (s, 1H), 8.47 (dd, *J* = 8.9, 3.2 Hz, 2H), 7.99 (d, *J* = 8.9 Hz, 1H), 7.75 (d, *J* = 8.2 Hz, 2H), 7.68 (d, *J* = 8.8 Hz, 1H), 6.74 (d, *J* = 8.2 Hz, 2H), 6.19 – 6.00 (m, 3H), 5.40 (dd, *J* = 21.8, 17.2 Hz, 2H), 5.31 – 5.26 (m, 2H), 5.23 (dd, *J* = 17.2, 10.2 Hz, 2H), 4.80 (d, *J* = 5.8 Hz, 2H), 4.76 (p, *J* = 6.1 Hz, 1H), 4.73 – 4.69 (m, 1H), 4.69 (d, *J* = 6.9 Hz, 2H), 4.58 (d, *J* = 5.9 Hz, 2H), 4.13 (brs, 2H), 1.40 (d, *J* = 6.2 Hz, 6H), 1.28 (d, *J* = 6.2 Hz, 6H); ESI-MS [M + H]<sup>+</sup>: *m/z* 644.30

Allyl 4-(4-(4-((2*S*,3*R*)-2-(((9*H*-fluoren-9-yl)methoxy)carbonyl)amino)-3-methoxy-4-oxo-4-(tritylamino)butanamido)benzamido)-2-(allyloxy)-3-isopropoxybenzamido)-2-(allyloxy)-3-isopropoxybenzoate (**S8**)

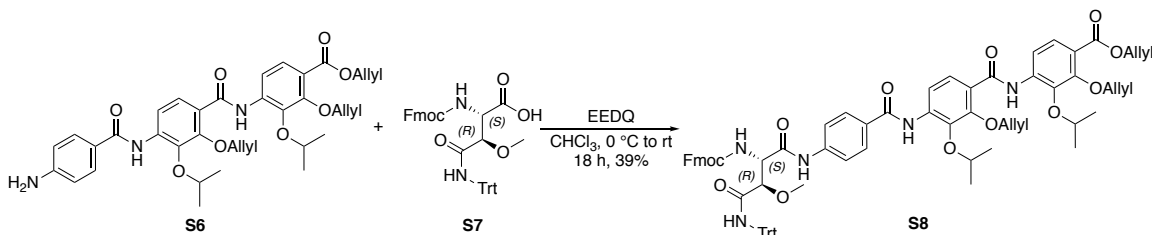

Tripeptide **S6** (28.4 mg, 44.0  $\mu$ mol) and Fmoc-(*S,R*)- $\beta$ -OMe-Asn **S7** (13.3 mg, 66.0  $\mu$ mol) were dissolved in CHCl<sub>3</sub> (200  $\mu$ L) and cooled to 0  $^{\circ}$ C. EEDQ (41.5 mg, 21.0  $\mu$ mol) was added and the resulting mixture was stirred at 0  $^{\circ}$ C for 20 min before warming to room temperature and stirring for 18 h under Ar(g). The solution was diluted with EtOAc and washed with 10 % KHSO<sub>4</sub> (2x) followed by brine (1x). The organic layer was then dried over Na<sub>2</sub>SO<sub>4</sub> and concentrated *in vacuo*. Crude material was purified via manual flash column chromatography (hexanes/EtOAc 5:1 to 4:1 to 2:1) to afford **S8** as a clear oil (21.7 mg, 17.0  $\mu$ mol, 39%).

<sup>1</sup>H NMR (600 MHz, CDCl<sub>3</sub>)  $\delta$  10.73 (s, 1H), 8.73 (s, 1H), 8.48 (d, *J* = 8.9 Hz, 2H), 8.24 (s, 1H), 8.02 (d, *J* = 8.8 Hz, 1H), 7.90 (s, 1H), 7.86 (d, *J* = 8.3 Hz, 2H), 7.76 (d, *J* = 7.5 Hz, 1H), 7.70 (dd, *J* = 13.3, 8.2 Hz, 2H), 7.60 (t, *J* = 6.6 Hz, 2H), 7.56 (d, *J* = 8.2 Hz, 2H), 7.43 – 7.36 (m, 2H), 7.34 – 7.25 (m, 2H), 7.21 (d, *J* = 5.2 Hz, 8H), 7.15 (d, *J* = 4.0 Hz, 4H), 6.21 – 5.96 (m, 3H), 5.54 (d, *J* = 8.2 Hz, 1H), 5.40 (dd, *J* = 22.0, 17.2 Hz, 2H), 5.32 – 5.19 (m, 4H), 4.83 (s, 1H), 4.81 (d, *J* = 5.9 Hz, 2H), 4.79 – 4.75 (m, 1H), 4.75 – 4.71 (m, 1H), 4.71 (d, *J* = 6.6 Hz, 2H), 4.63 – 4.56 (d, *J* = 6.6 Hz, 2H), 4.59 (d, *J* = 6.2 Hz, 2H), 4.25 (t, *J* = 6.4 Hz, 1H), 3.60 (s, 3H), 1.40 (d, *J* = 3.6, 2.7 Hz, 6H), 1.29 (d, *J* = 6.2 Hz, 6H); HRMS (ESI): *m/z* calculated for C<sub>75</sub>H<sub>74</sub>N<sub>5</sub>O<sub>13</sub> <sup>+</sup>[M + H]<sup>+</sup>: 1252.5283; observed 1252.5207

Allyl 2-(allyloxy)-4-(2-(allyloxy)-4-(4-((2*S*,3*R*)-2-amino-3-methoxy-4-oxo-4-(tritylamino)butanamido)benzamido)-3-isopropoxybenzamido)-3-isopropoxybenzoate (**S9**)

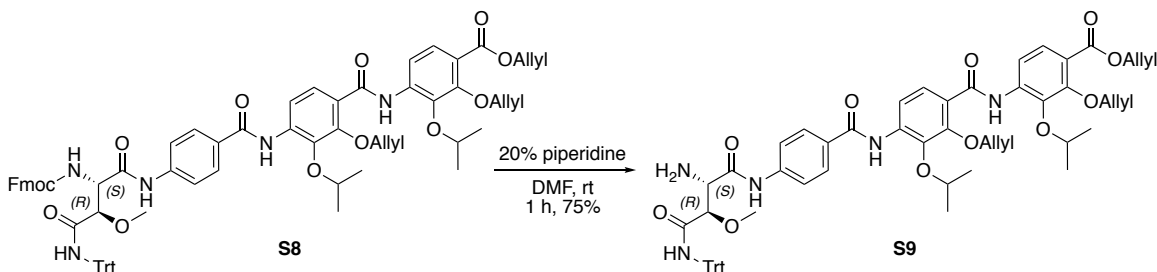

Fmoc-protected tripeptide **S8** (21.7 mg, 17.0  $\mu$ mol) was dissolved in dry DMF (205  $\mu$ L) followed by the addition of piperidine (51.0  $\mu$ L). The resulting mixture stirred at room temperature for 1 h under Ar(g). After quenching with saturated NH<sub>4</sub>Cl, the solution was extracted with DCM (3x) following by washing of the organic layer with saturated NaHCO<sub>3</sub> (1x). The organic layer was then dried over Na<sub>2</sub>SO<sub>4</sub> and concentrated *in vacuo*. Crude material was purified via manual flash column chromatography (hexanes/EtOAc 1:1 to 1:2) to afford **S9** as a clear/faint yellow oil (13.3 mg, 13.0  $\mu$ mol, 75%).

<sup>1</sup>H NMR (600 MHz, CDCl<sub>3</sub>)  $\delta$  10.73 (s, 1H), 9.45 (s, 1H), 8.72 (s, 1H), 8.47 (dd, *J* = 8.8, 3.7 Hz, 2H), 8.03 – 7.98 (m, 2H), 7.87 – 7.82 (m, 3H), 7.68 (d, *J* = 8.8 Hz, 1H), 7.65 (d, *J* = 8.3 Hz, 2H), 7.30 – 7.23 (m, 8H), 7.25 – 7.20 (m, 7H), 6.19 – 6.00 (m, 3H), 5.40 (dd, *J* = 22.0, 17.2 Hz, 2H), 5.32 – 5.20 (m, 5H), 4.81 (d, *J* = 5.8 Hz, 2H), 4.77 (q, *J* = 6.1 Hz, 1H), 4.72 (m, 1H), 4.70 (d, *J* = 6.9 Hz, 2H), 4.47



(d,  $J = 3.3$  Hz, 1H), 3.83 (d,  $J = 3.3$  Hz, 1H), 3.57 (s, 3H), 1.61 – 1.55 (m, 1H), 1.39 (dd,  $J = 6.3, 3.4$  Hz, 6H), 1.31 – 1.27 (m, 6H); ESI-MS  $[M + H]^+$ :  $m/z$  1030.72

#### Allyl 4-aminobenzoate (**S10a**)

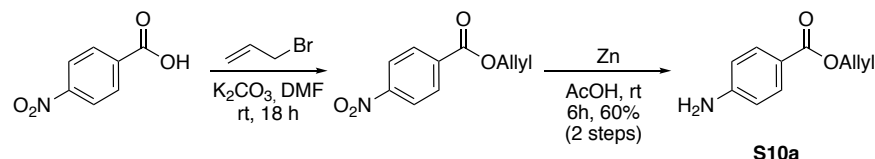

4-nitrobenzoic acid (1.00 g, 5.98 mmol) was dissolved in dry DMF (12.0 mL) followed by the addition of allyl bromide (0.57 mL, 6.58 mmol) and  $K_2CO_3$  (496 mg, 3.59 mmol). The reaction stirred at room temperature for 18 h under Ar(g). Et<sub>2</sub>O (60.0 mL) and H<sub>2</sub>O (60.0 mL) were added and the organic layer was then washed with saturated NaHCO<sub>3</sub> (2x), brine (1x), and dried over Na<sub>2</sub>SO<sub>4</sub>. The solvent was removed *in vacuo* resulting in a yellow oil that was used in the next step without further purification.

Allyl 4-nitrobenzoate (1.01 g, 4.88 mmol) was dissolved in a mixture of AcOH (6.00 mL) and EtOH (10.0 mL) and cooled to 0 °C. Zinc powder (6.38 g, 97.6 mmol) was added portionwise over 30 min. Reaction allowed to warm to room temperature and stirred for 6 h before quenching with saturated NaHCO<sub>3</sub>. The aqueous layer was extracted with EtOAc (2x) and the combined organic layers were washed with saturated NaHCO<sub>3</sub> (1x) followed by brine (1x). The organic layer was dried over Na<sub>2</sub>SO<sub>4</sub> and concentrated *in vacuo*. Crude material was purified via flash column chromatography with a gradient of 0-20% EtOAc in hexanes to afford **S10a** as a white solid (640 mg, 3.61 mmol, 60% over 2 steps).

<sup>1</sup>H NMR (600 MHz, CDCl<sub>3</sub>)  $\delta$  7.88 (d,  $J = 8.4$  Hz, 2H), 6.64 (d,  $J = 8.4$  Hz, 2H), 6.06 – 5.99 (m, 1H), 5.38 (dd,  $J = 17.1, 1.9$  Hz, 1H), 5.25 (dd,  $J = 10.3, 1.7$  Hz, 1H), 4.77 (d,  $J = 5.6$  Hz, 2H), 4.07 (s, 2H); ESI-MS  $[M + H]^+$ :  $m/z$  178.12

#### Preparation of allyl (S)-4-(2-(((9H-fluoren-9-yl)methoxy)carbonyl)amino)-3-phenylpropanamido)benzoate (**S10b**)

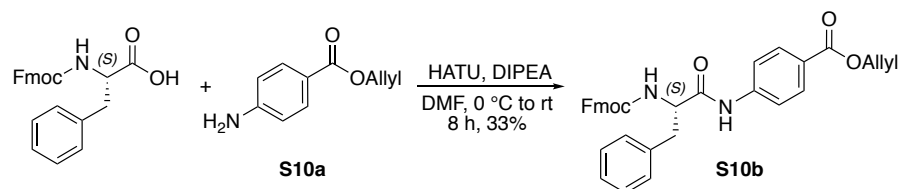

Fmoc-Phe-OH (45.7 mg, 0.118 mmol) was dissolved in 300  $\mu$ L of dry DMF and cooled to 0 °C before HATU (65.0 mg, 0.171 mmol) and DIPEA (61.6  $\mu$ L, 0.354 mmol) were added. A solution of **S10a** (20.9 mg, 0.118 mmol) dissolved in 30  $\mu$ L of dry DMF was added dropwise to the reaction mixture. After stirring at 0 °C for 1 h, the solution was allowed to stir at room temperature for 7 h. The reaction mixture was diluted with EtOAc and washed with 10 % KHSO<sub>4</sub> (2x) followed by brine (1x). The organic layer was dried over Na<sub>2</sub>SO<sub>4</sub> and concentrated *in vacuo*. Crude material was purified via manual flash column chromatography (0.25% MeOH in DCM) to afford dimer **S10b** as a white solid (19.4 mg, 35.0  $\mu$ mol, 33%).

<sup>1</sup>H NMR (600 MHz, DMSO-*d*<sub>6</sub>)  $\delta$  10.48 (s, 1H), 7.96 (d,  $J = 8.3$  Hz, 2H), 7.90 – 7.85 (m, 3H), 7.76 (d,  $J = 8.4$  Hz, 2H), 7.66 (dd,  $J = 11.4, 7.6$  Hz, 2H), 7.40 (t,  $J = 7.5$  Hz, 2H), 7.36 (d,  $J = 7.7$  Hz, 2H), 7.29 (dt,  $J = 14.6, 7.4$  Hz, 4H), 7.20 (t,  $J = 7.4$  Hz, 1H), 6.04 (ddt,  $J = 16.2, 10.6, 5.4$  Hz, 1H), 5.40 (d,  $J = 17.3$  Hz, 1H), 5.27 (d,  $J = 10.5$  Hz, 1H), 4.78 (d,  $J = 5.5$  Hz, 2H), 4.47 – 4.43 (m, 1H), 4.22 – 4.14 (m, 3H), 3.06 (dd,  $J = 13.8, 4.7$  Hz, 1H), 2.91 (dd,  $J = 13.7, 10.2$  Hz, 1H); ESI-MS  $[M + H]^+$ :  $m/z$  569.12

#### (S)-4-(2-(((9H-fluoren-9-yl)methoxy)carbonyl)amino)-3-phenylpropanamido)benzoic acid (**S10**)

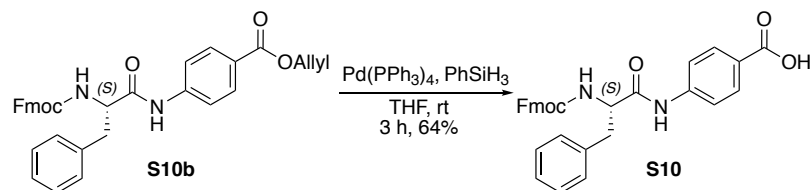

Dimer **S10b** (61.3 mg, 0.112 mmol) was dissolved in dry THF (2.58 mL) followed by the addition of Pd(PPh<sub>3</sub>)<sub>4</sub> (12.6 mg, 11.2  $\mu$ mol) and phenylsilane (69.2  $\mu$ L, 0.561 mmol). The reaction mixture was stirred for 3 h at room temperature under the exclusion of light. After removal of all volatile components, the residue was dissolved in DCM and filtered through a short silica plug rinsing with several portions of DCM. The solvent was concentrated *in vacuo*. Crude material was purified via manual flash column chromatography (2-3% MeOH in DCM) to afford **S10** as a white solid (36.4 mg, 0.072 mmol, 64%).

<sup>1</sup>H NMR (600 MHz, DMSO-*d*<sub>6</sub>)  $\delta$  10.48 (s, 1H), 7.91 (d,  $J = 8.4$  Hz, 3H), 7.87 (d,  $J = 7.6$  Hz, 2H), 7.72 (d,  $J = 8.4$  Hz, 2H), 7.66 (dd,  $J = 11.7, 7.5$  Hz, 2H), 7.39 (dt,  $J = 14.7, 7.7$  Hz, 4H), 7.28 (t,  $J = 6.6$  Hz, 4H), 7.20 (t,  $J = 7.4$  Hz, 1H), 4.47 – 4.43 (m, 1H), 4.17 (dt,  $J = 14.1, 7.3$  Hz, 3H), 3.06 (dd,  $J = 13.8, 4.6$  Hz, 1H), 2.92 (dd,  $J = 13.7, 10.3$  Hz, 1H); ESI-MS  $[M + H]^+$ :  $m/z$  507.10

Allyl 4-(4-(4-((2S,3R)-2-(4-((S)-2-(((9H-fluoren-9-yl)methoxy)carbonyl)amino)-3-phenylpropanamido)benzamido)-3-methoxy-4-oxo-4-(tritylamino)butanamido)benzamido)-2-(allyloxy)-3-isopropoxybenzamido)-2-(allyloxy)-3-isopropoxybenzoate (**S11**)

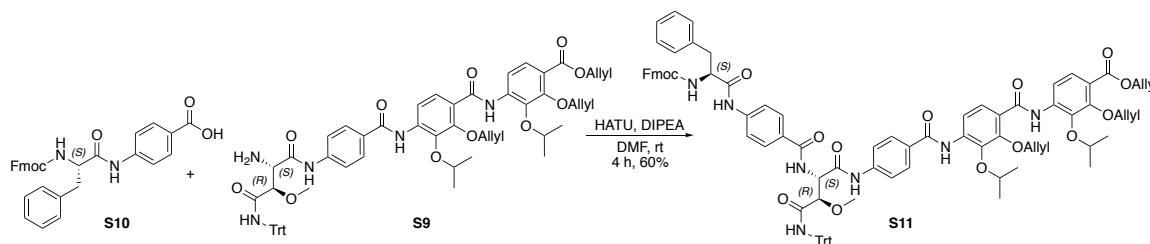

Dipeptide **S10** (4.70 mg, 9.00  $\mu\text{mol}$ ) and HATU (3.40 mg, 9.00  $\mu\text{mol}$ ) were dissolved in dry DMF (150  $\mu\text{L}$ ). DIPEA (5.40  $\mu\text{L}$ , 31.0  $\mu\text{mol}$ ) was added followed by addition of **S9** (6.4 mg, 6.20  $\mu\text{mol}$ ) dissolved in dry DMF (75.0  $\mu\text{L}$ ). The reaction stirred under Ar(g) for 4 h at room temperature. The reaction mixture was then diluted with EtOAc and washed with 10%  $\text{KH}_2\text{SO}_4$  (2x) and brine (1x). The organic layer was dried over  $\text{Na}_2\text{SO}_4$  and concentrated *in vacuo*. Crude material was purified via manual flash column chromatography (hexanes/EtOAc 2:1 to 1:1) to afford **S11** as a clear oil (5.70 mg, 3.60  $\mu\text{mol}$ , 60%).

$^1\text{H}$  NMR (600 MHz,  $\text{CDCl}_3$ )  $\delta$  10.73 (s, 1H), 9.33 (s, 1H), 8.73 (s, 1H), 8.47 (d,  $J = 8.9$  Hz, 2H), 8.07 (s, 1H), 8.01 (d,  $J = 8.9$  Hz, 1H), 7.85 (d,  $J = 8.5$  Hz, 2H), 7.76 (d,  $J = 7.6$  Hz, 2H), 7.68 (d,  $J = 8.8$  Hz, 1H), 7.64 (d,  $J = 8.3$  Hz, 2H), 7.59 (d,  $J = 8.3$  Hz, 2H), 7.53 (t,  $J = 7.5$  Hz, 3H), 7.39 (t,  $J = 7.5$  Hz, 2H), 7.33 (d,  $J = 8.3$  Hz, 2H), 7.28 (d,  $J = 6.9$  Hz, 5H), 7.20 (s, 3H), 7.17 (h,  $J = 7.3, 6.4$  Hz, 14H), 6.20 – 6.00 (m, 3H), 5.40 (dd,  $J = 22.3, 17.2$  Hz, 3H), 5.32 – 5.20 (m, 5H), 4.88 (t,  $J = 6.5$  Hz, 1H), 4.81 (d,  $J = 5.9$  Hz, 2H), 4.77 (q,  $J = 6.1$  Hz, 1H), 4.73 (d,  $J = 6.2$  Hz, 1H), 4.70 (d,  $J = 6.7$  Hz, 2H), 4.59 (d,  $J = 6.3$  Hz, 3H), 4.56 – 4.37 (m, 4H), 4.20 (t,  $J = 6.8$  Hz, 1H), 3.65 (s, 3H), 3.16 (d,  $J = 37.1$  Hz, 3H), 1.39 (d,  $J = 6.2$  Hz, 6H), 1.28 (d,  $J = 6.2$  Hz, 6H); HRMS (ESI):  $m/z$  calculated for  $\text{C}_{91}\text{H}_{88}\text{N}_7\text{O}_{15}^+$  [ $\text{M} + \text{H}$ ] $^+$ : 1518.6338; observed 1518.6293

4-(4-(4-((2S,3R)-2-(4-((S)-2-(((9H-fluoren-9-yl)methoxy)carbonyl)amino)-3-phenylpropanamido)benzamido)-3-methoxy-4-oxo-4-(tritylamino)butanamido)benzamido)-2-hydroxy-3-isopropoxybenzamido)-2-hydroxy-3-isopropoxybenzoic acid (**S12**)

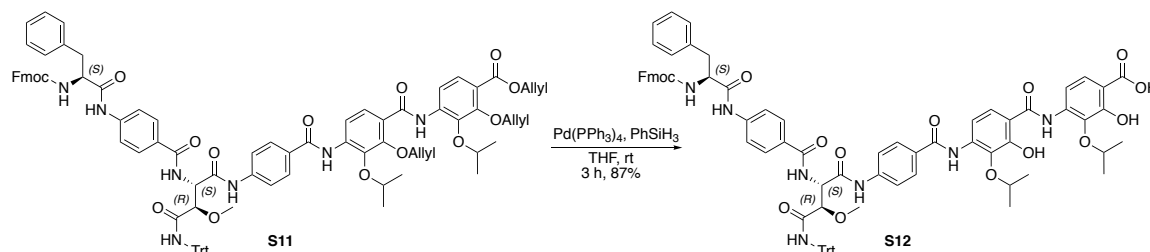

Linear species **S11** (5.70 mg, 3.80  $\mu\text{mol}$ ) was dissolved in dry THF (100  $\mu\text{L}$ ) followed by the addition of  $\text{Pd}(\text{PPh}_3)_4$  (0.420 mg, 0.362  $\mu\text{mol}$ ) and phenylsilane (1.4  $\mu\text{L}$ , 0.012 mmol). The reaction mixture was stirred for 3 h at room temperature under the exclusion of light. After removal of all volatile components, the residue was dissolved in MeOH and filtered through a syringe filter (PTFE, 0.2  $\mu\text{m}$ ) and the filter was rinsed with several portions of MeOH. The solvent was concentrated *in vacuo*. Crude material was filtered through a short silica plug (DCM/MeOH 10:1) to afford **S12** as a white solid (4.60 mg, 3.30  $\mu\text{mol}$ , 87%). Presence of product confirmed via MS before proceeding to next step. HRMS (ESI):  $m/z$  calculated for  $\text{C}_{82}\text{H}_{75}\text{N}_7\text{O}_{15}$  [ $\text{M} + \text{H}$ ]: 1397.5321; observed 1397.5380

4-(4-(4-((2S,3R)-4-amino-2-(4-((S)-2-amino-3-phenylpropanamido)benzamido)-3-methoxy-4-oxobutanamido)benzamido)-2-hydroxy-3-isopropoxybenzamido)-2-hydroxy-3-isopropoxybenzoic acid (**S13**)

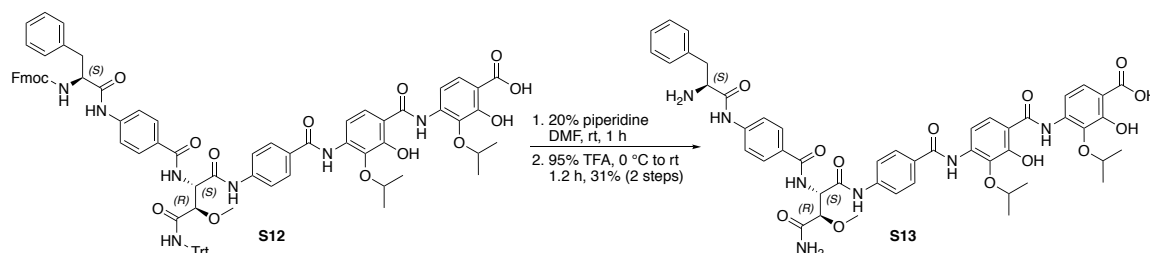

Compound **S12** (4.60 mg, 3.30  $\mu\text{mol}$ ) was dissolved in dry DMF (60.0  $\mu\text{L}$ ) followed by the addition of piperidine (15.0  $\mu\text{L}$ ). The resulting mixture stirred at room temperature for 1 h under Ar(g). After quenching with saturated  $\text{NH}_4\text{Cl}$ , the solution was extracted with EtOAc

(3x) followed by washing of the organic layer with saturated NaHCO<sub>3</sub> (1x). The organic layer was then dried over Na<sub>2</sub>SO<sub>4</sub> and concentrated *in vacuo*. Crude material was used in the next step without further purification.

Crude residue was dissolved in a pre-cooled solution of 95% TFA (2.5% TIPS, 2.5% H<sub>2</sub>O, 175 μL) at 0 °C. After stirring at 0 °C for 5 min, the reaction mixture was allowed to warm to room temperature and kept under Ar(g) for 1.2 h. All volatiles were removed *in vacuo* and the crude residue was dissolved in DCM and evaporated twice. Consumption of starting material monitored via LCMS analysis. Crude material was purified via RP-HPLC (20-80% ACN/H<sub>2</sub>O) to afford (**S13**) as a white solid (1.10 mg, 1.20 μmol, 31% over 2 steps).

<sup>1</sup>H NMR (600 MHz, DMSO-*d*<sub>6</sub>) δ 10.54 (s, 1H), 9.51 (s, 1H), 8.41 (d, *J* = 8.1 Hz, 1H), 8.16 (s, 1H), 7.97 (d, *J* = 8.3 Hz, 2H), 7.83 (dd, *J* = 8.7, 3.9 Hz, 3H), 7.76 (d, *J* = 8.7 Hz, 1H), 7.70 (d, *J* = 8.3 Hz, 2H), 7.56 (d, *J* = 8.7 Hz, 1H), 7.48 (d, *J* = 15.7 Hz, 2H), 7.38 (d, *J* = 8.5 Hz, 1H), 7.27 (dd, *J* = 17.6, 7.3 Hz, 3H), 7.22 (d, *J* = 7.2 Hz, 1H), 6.90 (s, 1H), 4.91 (t, *J* = 8.1 Hz, 1H), 4.72 (dq, *J* = 13.3, 6.5 Hz, 1H), 4.39 (s, 1H), 4.08 (d, *J* = 7.9 Hz, 1H), 3.73 (s, 1H), 3.31 (s, 3H), 3.05 (dd, *J* = 13.6, 5.5 Hz, 1H), 2.82 (dd, *J* = 13.7, 7.6 Hz, 1H), 2.55 (s, 1H), 1.29 – 1.22 (m, 12H); <sup>13</sup>C NMR (151 MHz, DMSO-*d*<sub>6</sub>) δ 170.94, 168.73, 165.46, 164.23, 163.27, 142.10, 141.58, 138.27, 138.14, 129.37, 128.74, 128.41, 128.27, 126.46, 124.46, 123.95, 118.89, 118.54, 116.32, 79.95, 79.23, 79.00, 78.78, 72.55, 57.75, 56.59, 55.74, 40.43, 35.13, 31.32, 30.75, 29.05, 28.72, 28.61, 25.13, 22.12, 22.08, 14.00; HRMS (ESI): *m/z* calculated for C<sub>48</sub>H<sub>51</sub>N<sub>7</sub>O<sub>13</sub><sup>+</sup> [M + H]<sup>+</sup>: 934.3623; observed 934.3613

## Total synthesis of PABA70

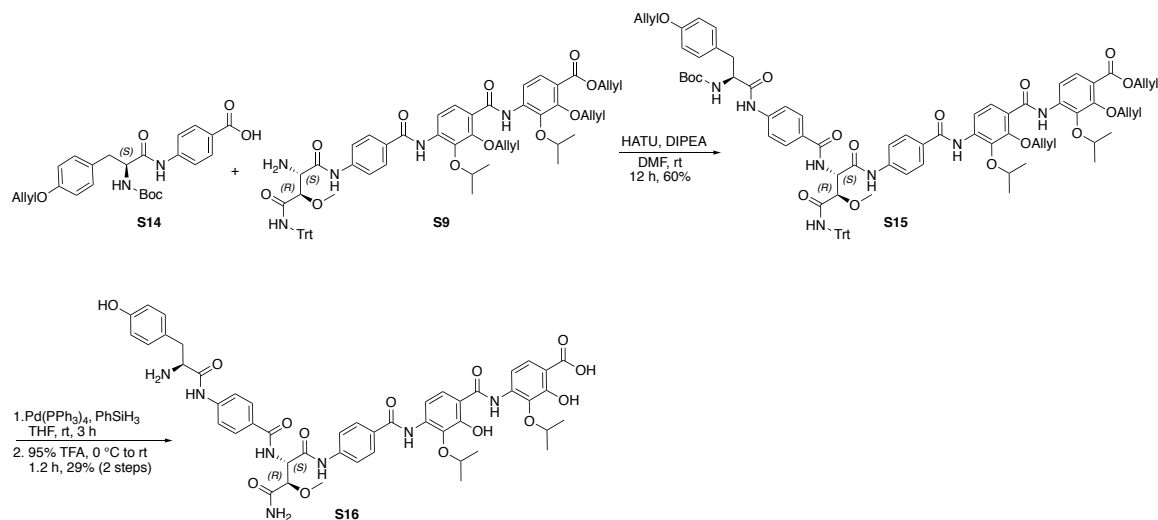

Scheme S2. Synthetic pathway for the preparation of PABA70 (S16).

### Allyl (S)-4-(3-(4-(allyloxy)phenyl)-2-((tert-butoxycarbonyl)amino)propanamido)benzoate (S14a)

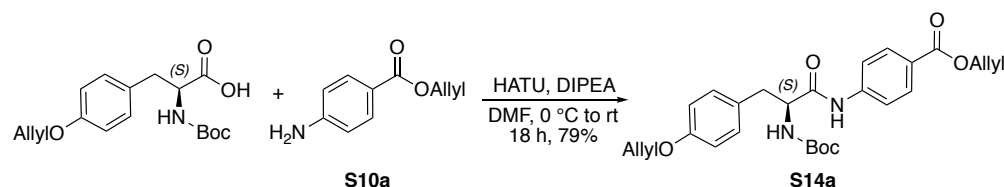

Boc-Tyr(Allyl)-OH (313 mg, 0.974 mmol) was dissolved in 1.2 mL of dry DMF and cooled to 0 °C before HATU (481 mg, 1.27 mmol) and DIPEA (0.848 mL, 4.87 mmol) were added. After stirring under Ar(g) for 30 min in an ice bath, a solution of S10a dissolved in 0.300 mL of dry DMF was added dropwise to the reaction mixture. The solution was allowed to stir at room temperature overnight. After removal of DMF *in vacuo*, the crude material was dissolved in EtOAc and washed with 10% KHSO<sub>4</sub> (2x) followed by brine (1x). The organic layer was dried over Na<sub>2</sub>SO<sub>4</sub> and concentrated *in vacuo*. Crude material was purified via flash column chromatography with a gradient of 0-20% EtOAc in hexanes to afford dimer S14a as a pale yellow oil (371 mg, 0.770 mmol, 79%).

<sup>1</sup>H NMR (600 MHz, CDCl<sub>3</sub>) δ 8.40 (s, 1H), 7.95 (d, *J* = 8.4 Hz, 2H), 7.46 (d, *J* = 8.4 Hz, 2H), 7.13 (d, *J* = 8.2 Hz, 2H), 6.83 (d, *J* = 8.2 Hz, 2H), 6.07 – 5.98 (m, 2H), 5.39 (dd, *J* = 17.3, 4.3 Hz, 2H), 5.27 (dd, *J* = 10.6, 6.2 Hz, 2H), 5.24 (d, *J* = 6.8 Hz, 1H), 4.79 (d, *J* = 5.8 Hz, 2H), 4.48 (d, *J* = 5.5 Hz, 3H), 3.07 (qd, *J* = 14.9, 14.3, 7.1 Hz, 2H), 1.41 (s, 9H); ESI-MS [*M* + *H*]<sup>+</sup>: *m/z* 479.23

### (S)-4-(3-(4-(allyloxy)phenyl)-2-((tert-butoxycarbonyl)amino)propanamido)benzoic acid (S14)

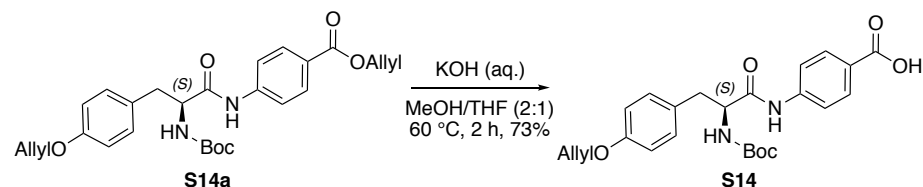

Dimer S14a (28.7 mg, 59.0 μmol) was dissolved in MeOH/THF (2:1, 400 μL). An aqueous solution of KOH (5.0 M, 59.7 μL, 5.0 eq) was added and the reaction mixture stirred for 2 h at 60 °C. The resulting reaction mixture was concentrated *in vacuo* and diluted with H<sub>2</sub>O (0.380 mL). The product was precipitated with the addition of 6M HCl (153 μL), filtered, and dried *in vacuo*. An off-white solid was obtained (19.2 mg, 44.0 μmol, 73%).

<sup>1</sup>H NMR (600 MHz, DMSO-*d*<sub>6</sub>) δ 10.53 (s, 1H), 7.89 (d, *J* = 8.3 Hz, 2H), 7.74 (d, *J* = 8.3 Hz, 2H), 7.25 (d, *J* = 8.3 Hz, 2H), 7.13 (dd, *J* = 11.3, 8.2 Hz, 1H), 6.85 (d, *J* = 8.3 Hz, 2H), 6.01 (ddt, *J* = 16.1, 10.4, 5.1 Hz, 1H), 5.39 – 5.33 (m, 1H), 5.22 (d, *J* = 10.6 Hz, 1H), 4.51 (d, *J* = 5.2 Hz, 2H), 4.30 (td, *J* = 9.2, 4.7 Hz, 1H), 2.94 (dd, *J* = 13.9, 4.7 Hz, 1H), 2.78 (dd, *J* = 13.8, 10.2 Hz, 1H), 1.32 (s, 9H); ESI-MS [*M* + *H*]<sup>+</sup>: *m/z* 463.22

### Allyl 2-(allyloxy)-4-(2-(allyloxy)-4-(4-((2*S*,3*R*)-2-(4-((*S*)-3-(4-(allyloxy)phenyl)-2-((tert-butoxycarbonyl)amino)propanamido)benzamido)-3-methoxy-4-oxo-4-(tritylamino)butanamido)benzamido)-3-isopropoxybenzamido)-3-isopropoxybenzoate (S15)

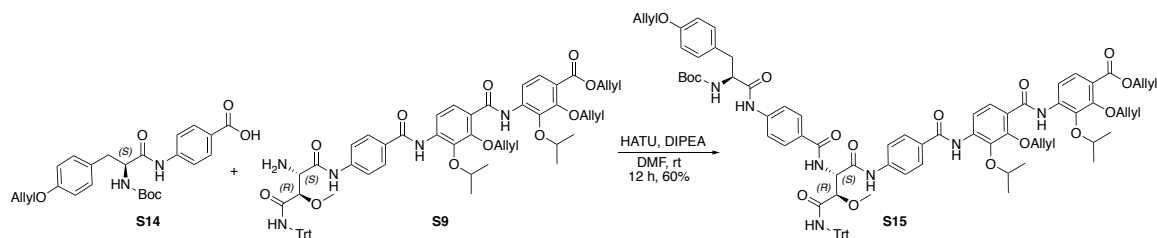

The reaction procedure was the same as described for compound **S11**. The product was obtained as a clear oil (5.10 mg, 3.51  $\mu\text{mol}$ , 60%).

$^1\text{H}$  NMR (600 MHz,  $\text{CDCl}_3$ )  $\delta$  10.72 (s, 1H), 9.33 (s, 1H), 8.73 (s, 1H), 8.47 (d,  $J$  = 8.9 Hz, 2H), 8.06 (s, 1H), 8.00 (d,  $J$  = 8.9 Hz, 1H), 7.85 (d,  $J$  = 8.2 Hz, 2H), 7.70 – 7.58 (m, 4H), 7.46 (s, 1H), 7.42 (d,  $J$  = 8.0 Hz, 2H), 7.17 (p,  $J$  = 8.9, 8.3 Hz, 15H), 6.86 (d,  $J$  = 8.1 Hz, 2H), 6.20 – 6.09 (m, 2H), 6.04 (dtt,  $J$  = 15.8, 10.3, 5.7 Hz, 2H), 5.44 – 5.35 (m, 3H), 5.30 – 5.20 (m, 4H), 5.09 (s, 1H), 4.88 (t,  $J$  = 6.5 Hz, 1H), 4.80 (d,  $J$  = 5.8 Hz, 2H), 4.79 – 4.70 (m, 2H), 4.70 (d,  $J$  = 6.6 Hz, 2H), 4.60 – 4.56 (m, 3H), (d,  $J$  = 5.0 Hz, 2H), 4.50 (d,  $J$  = 5.3 Hz, 2H), 4.43 (s, 1H), 3.65 (s, 3H), 3.10 (d,  $J$  = 7.0 Hz, 2H), 1.44 (s, 9H), 1.39 (d,  $J$  = 6.1 Hz, 6H), 1.28 (d,  $J$  = 6.2 Hz, 6H); HRMS (ESI):  $m/z$  calculated for  $\text{C}_{84}\text{H}_{90}\text{N}_7\text{O}_{16}^+ [\text{M} + \text{H}]^+$ : 1452.6440; observed 1452.6329

4-(4-(4-((2S,3R)-4-amino-2-(4-((S)-2-amino-3-(4-hydroxyphenyl)propanamido)benzamido)-3-methoxy-4-oxobutanamido)benzamido)-2-hydroxy-3-isopropoxybenzamido)-2-hydroxy-3-isopropoxybenzoic acid (**S16**)

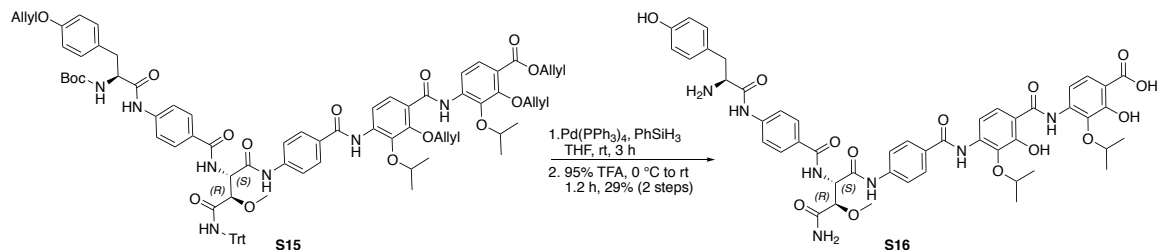

Linear species **S15** (5.20 mg, 3.60  $\mu\text{mol}$ ) was dissolved in dry THF (100  $\mu\text{L}$ ) followed by the addition of  $\text{Pd}(\text{PPh}_3)_4$  (0.410 mg, 0.358  $\mu\text{mol}$ ) and phenylsilane (1.40  $\mu\text{L}$ , 11.0  $\mu\text{mol}$ ). The reaction mixture was stirred for 3 h at room temperature under the exclusion of light. After removal of all volatile components, the residue was dissolved in MeOH and filtered through a syringe filter (PTFE, 0.2  $\mu\text{m}$ ) and the filter was rinsed with several portions of MeOH. The solvent was concentrated *in vacuo*. Crude material was filtered through a short silica plug (DCM/MeOH 10:1 to 5:1) to afford **S16** as a white solid (3.4 mg, crude). Filtered material was used in the next step without additional purification.

The partially deprotected **S15** was dissolved in a pre-cooled solution of 95% TFA (2.5% TIPS, 2.5%  $\text{H}_2\text{O}$ , 175  $\mu\text{L}$ ) at 0  $^\circ\text{C}$ . After stirring at 0  $^\circ\text{C}$  for 5 min, the reaction mixture was allowed to warm to room temperature and kept under  $\text{Ar}(\text{g})$  for 1.2 h. All volatiles were removed *in vacuo* and the crude residue was dissolved in DCM and evaporated twice. Consumption of starting material monitored via LCMS analysis. Crude material was purified via RP-HPLC (10-90% ACN/ $\text{H}_2\text{O}$ ) to afford **S16** as a white solid (1.00 mg, 1.10  $\mu\text{mol}$ , 29% over 2 steps).

$^1\text{H}$  NMR (600 MHz,  $\text{DMSO}-d_6$ )  $\delta$  10.54 (s, 1H), 9.22 (s, 1H), 8.84 (s, 1H), 8.52 (s, 6H), 8.44 (d,  $J$  = 8.3 Hz, 1H), 7.88 – 7.80 (m, 3H), 7.72 (d,  $J$  = 8.5 Hz, 2H), 7.57 (s, 1H), 7.44 (s, 1H), 7.41 (d,  $J$  = 8.7 Hz, 1H), 7.25 (dd,  $J$  = 8.6, 4.0 Hz, 1H), 7.02 (t,  $J$  = 7.9 Hz, 2H), 6.83 (x), 6.65 (d,  $J$  = 8.0 Hz, 2H), 6.28 (s, 1H), 5.03 (p,  $J$  = 6.1 Hz, 1H), 4.90 (t,  $J$  = 8.1 Hz, 1H), 4.66 (p,  $J$  = 6.1 Hz, 1H), 4.09 (d,  $J$  = 8.0 Hz, 1H), 3.51 (m,  $J$  = 7.1 Hz, 1H), 3.31 (s, 3H), 2.89 (dd,  $J$  = 13.6, 5.5 Hz, 1H), 1.27 (d,  $J$  = 6.0 Hz, 6H), 1.23 (d,  $J$  = 5.9 Hz, 6H);  $^{13}\text{C}$  NMR (151 MHz,  $\text{DMSO}-d_6$ )  $\delta$  174.20, 171.92, 170.95, 168.68, 165.62, 165.46, 156.59, 155.78, 141.84, 138.21, 138.08, 130.19, 128.35, 128.08, 127.58, 123.83, 119.12, 118.40, 116.49, 114.97, 107.77, 79.98, 72.30, 57.71, 57.43, 29.07, 28.74, 22.93, 22.13, 21.72, 14.01; HRMS (ESI):  $m/z$  calculated for  $\text{C}_{48}\text{H}_{52}\text{N}_7\text{O}_{14}^+ [\text{M} + \text{H}]^+$ : 950.3572; observed 950.3451

## Total synthesis of PABA57

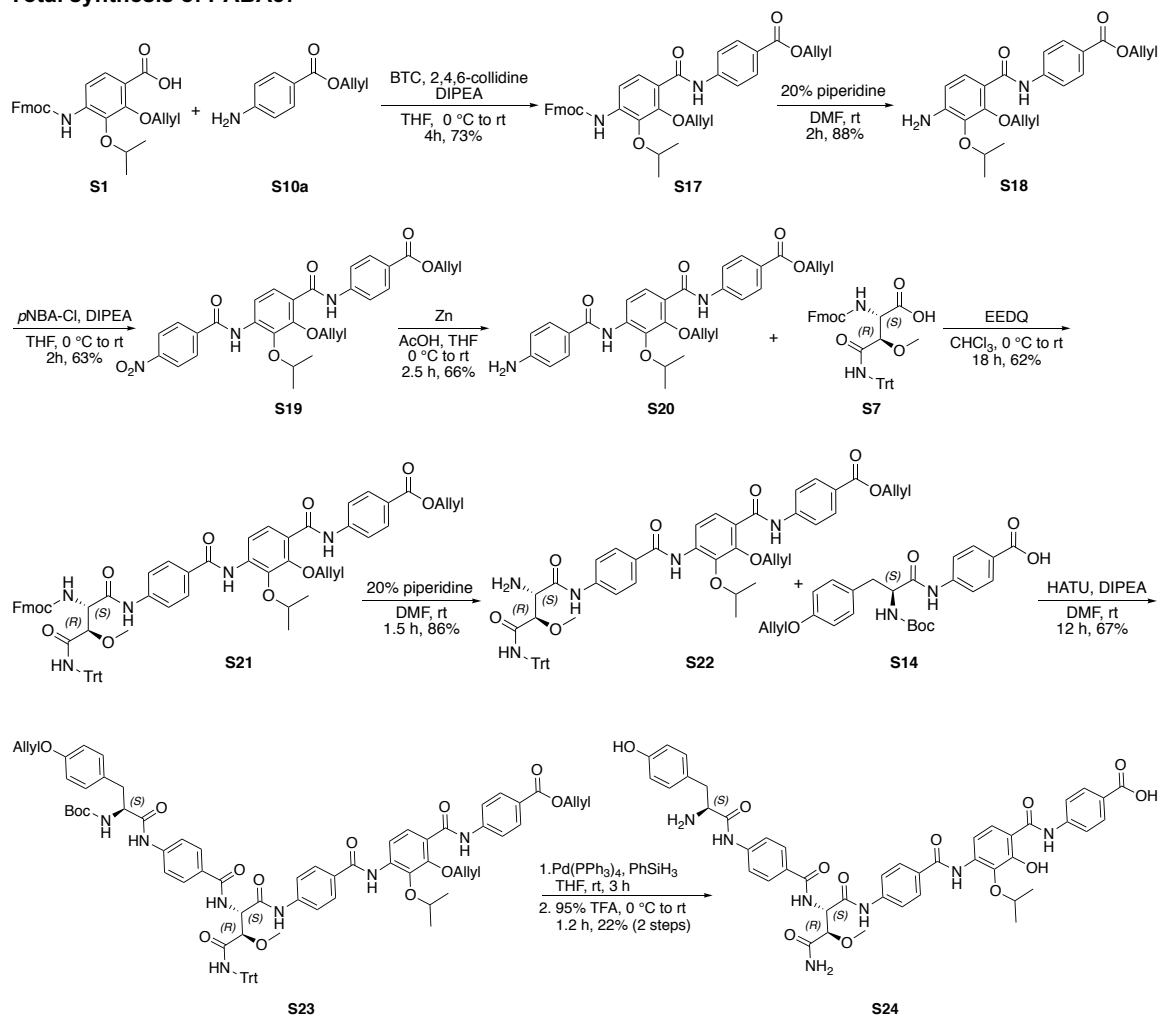

Scheme S3. Synthetic pathway for the preparation of PABA57 (**S24**).

### Allyl 4-(4-(((9H-fluoren-9-yl)methoxy)carbonyl)amino)-2-(allyloxy)-3-isopropoxybenzamido)benzoate (**S17**)

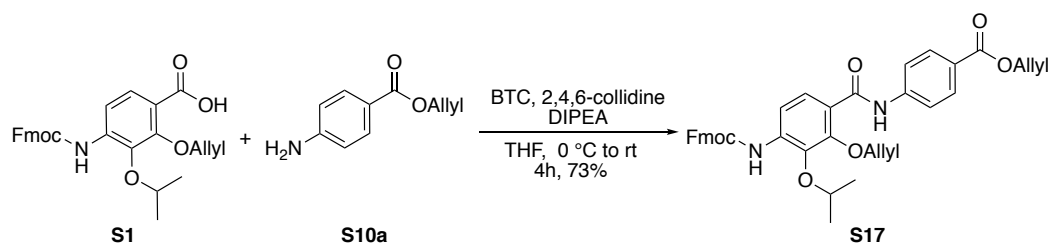

The reaction procedure was the same as described for compound **S3**. The product **S17** was obtained as a clear oil (126 mg, 0.200 mmol, 73%).

$^1\text{H NMR}$  (600 MHz,  $\text{CDCl}_3$ )  $\delta$  10.21 (s, 1H), 8.06 (d,  $J = 8.5$  Hz, 2H), 7.99 (d,  $J = 7.7$  Hz, 1H), 7.79 (d,  $J = 7.6$  Hz, 2H), 7.76 (d,  $J = 8.5$  Hz, 2H), 7.62 (d,  $J = 7.6$  Hz, 2H), 7.43 (t,  $J = 7.5$  Hz, 3H), 7.33 (t,  $J = 7.5$  Hz, 2H), 6.13 (ddt,  $J = 16.5, 11.1, 5.8$  Hz, 1H), 6.05 (ddt,  $J = 16.4, 10.8, 5.6$  Hz, 1H), 5.49 (d,  $J = 17.1$  Hz, 1H), 5.45–5.38 (m, 2H), 5.29 (d,  $J = 10.4$  Hz, 1H), 4.82 (d,  $J = 5.7$  Hz, 2H), 4.68 (d,  $J = 5.9$  Hz, 2H), 4.64 (p,  $J = 6.1$  Hz, 1H), 4.56 (p,  $J = 6.4$  Hz, 2H), 4.33 (t,  $J = 6.8$  Hz, 1H), 1.36 (d,  $J = 6.2$  Hz, 6H); ESI-MS  $[\text{M} + \text{H}]^+$ :  $m/z$  633.24

Allyl 4-(2-(allyloxy)-4-amino-3-isopropoxybenzamido)benzoate (S18)

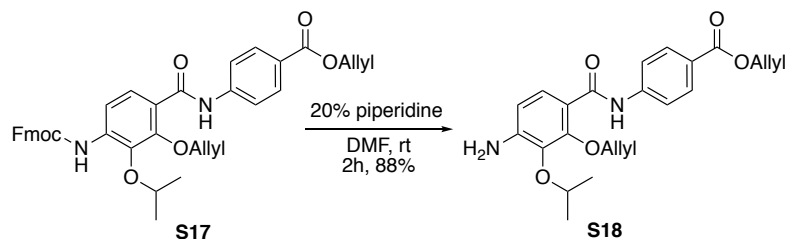

The reaction procedure was the same as described for compound **S4**. The product **S18** was obtained as a pale yellow oil (111 mg, 0.271 mmol, 88%).

$^1\text{H NMR}$  (600 MHz,  $\text{CDCl}_3$ )  $\delta$  10.27 (s, 1H), 8.03 (d,  $J = 8.4$  Hz, 2H), 7.83 (d,  $J = 8.6$  Hz, 1H), 7.74 (d,  $J = 8.4$  Hz, 2H), 6.60 (d,  $J = 8.6$  Hz, 1H), 6.13 (ddt,  $J = 16.5, 10.9, 5.9$  Hz, 1H), 6.04 (ddt,  $J = 16.4, 10.9, 5.6$  Hz, 1H), 5.48 (d,  $J = 17.1$  Hz, 1H), 5.40 (d,  $J = 17.1$  Hz, 1H), 5.37 (d,  $J = 10.5$  Hz, 1H), 5.28 (d,  $J = 10.5$  Hz, 1H), 4.80 (d,  $J = 5.7$  Hz, 2H), 4.68 (d,  $J = 5.9$  Hz, 2H), 4.56 (h,  $J = 6.1$  Hz, 1H), 4.25 (s, 2H), 1.33 (d,  $J = 6.3$  Hz, 6H); ESI-MS  $[\text{M} + \text{H}]^+$ :  $m/z$  411.21

Allyl 4-(2-(allyloxy)-3-isopropoxy-4-(4-nitrobenzamido)benzamido)benzoate (S19)

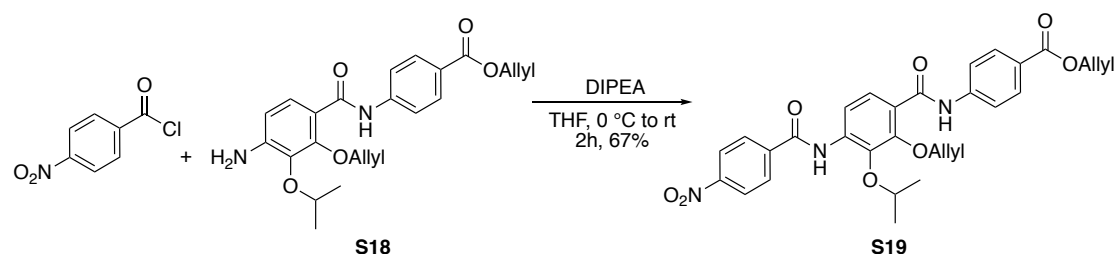

The reaction procedure was the same as described for compound **S5**. Crude material was purified via flash column chromatography with a gradient of gradient of 0-30% EtOAc in hexanes to afford **S19** as a pale yellow oil (90.0 mg, 0.160 mmol, 67%).

$^1\text{H NMR}$  (600 MHz,  $\text{CDCl}_3$ )  $\delta$  10.16 (s, 1H), 8.78 (s, 1H), 8.46 (d,  $J = 8.9$  Hz, 1H), 8.39 (d,  $J = 8.4$  Hz, 2H), 8.06 (dt,  $J = 8.3, 5.8$  Hz, 5H), 7.75 (d,  $J = 8.4$  Hz, 2H), 6.14 (ddt,  $J = 16.5, 11.0, 5.9$  Hz, 1H), 6.04 (ddt,  $J = 16.4, 10.8, 5.6$  Hz, 1H), 5.50 (d,  $J = 17.1$  Hz, 1H), 5.44 – 5.38 (m, 2H), 5.29 (d,  $J = 10.4$  Hz, 1H), 4.81 (d,  $J = 5.9$  Hz, 2H), 4.78 (dd,  $J = 12.3, 6.1$  Hz, 1H), 4.70 (d,  $J = 6.0$  Hz, 2H), 1.39 (d,  $J = 6.2$  Hz, 6H); ESI-MS  $[\text{M} + \text{H}]^+$ :  $m/z$  560.16

Allyl 4-(2-(allyloxy)-4-(4-aminobenzamido)-3-isopropoxybenzamido)benzoate (S20)

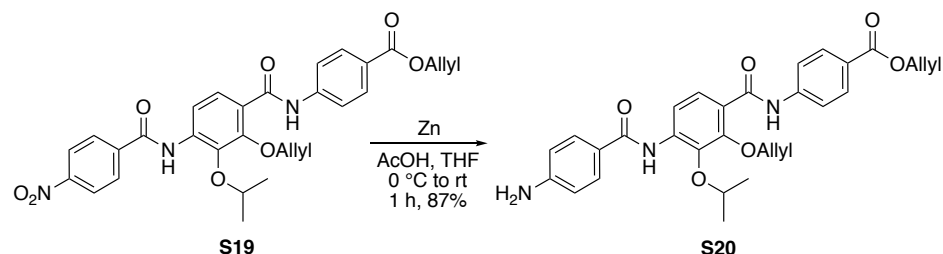

The reaction procedure was the same as described for compound **S6**. The product was obtained a pale yellow oil (74.0 mg, 0.140 mmol, 87%).

$^1\text{H NMR}$  (600 MHz,  $\text{CDCl}_3$ )  $\delta$  10.22 (s, 1H), 8.65 (s, 1H), 8.49 (d,  $J = 8.9$  Hz, 1H), 8.05 (t,  $J = 8.3$  Hz, 3H), 7.75 (dd,  $J = 13.1, 8.3$  Hz, 4H), 6.75 (d,  $J = 8.1$  Hz, 2H), 6.14 (ddt,  $J = 16.5, 11.0, 5.9$  Hz, 1H), 6.05 (ddt,  $J = 16.4, 10.8, 5.6$  Hz, 1H), 5.50 (d,  $J = 17.1$  Hz, 1H), 5.44 – 5.38 (m, 2H), 5.29 (d,  $J = 10.3$  Hz, 1H), 4.82 (d,  $J = 5.7$  Hz, 2H), 4.73 (q,  $J = 6.2$  Hz, 1H), 4.69 (d,  $J = 5.9$  Hz, 2H), 4.23 (s, 2H), 1.38 (d,  $J = 6.2$  Hz, 6H); ESI-MS  $[\text{M} + \text{H}]^+$ :  $m/z$  530.20

Allyl 4-(4-(4-((2S,3R)-2-(((9H-fluoren-9-yl)methoxy)carbonyl)amino)-3-methoxy-4-oxo-4-(tritylamino)butanamido)benzamido)-2-(allyloxy)-3-isopropoxybenzamido)benzoate (S21)

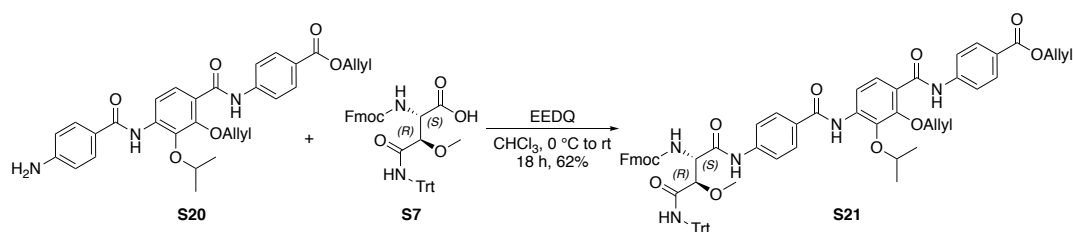

The reaction procedure was the same as described for compound **S8**. The product **S21** was obtained as a clear oil (10.0 mg, 88.0  $\mu\text{mol}$ , 62%).

$^1\text{H NMR}$  (600 MHz,  $\text{CDCl}_3$ )  $\delta$  10.21 (s, 1H), 8.73 (s, 1H), 8.50 (d,  $J = 8.9$  Hz, 1H), 8.24 (s, 1H), 8.07 (dd,  $J = 8.7, 4.7$  Hz, 3H), 7.90 (s, 1H), 7.85 (d,  $J = 8.3$  Hz, 2H), 7.77 (d,  $J = 8.4$  Hz, 3H), 7.71 (d,  $J = 7.6$  Hz, 1H), 7.60 (t,  $J = 6.5$  Hz, 2H), 7.56 (d,  $J = 8.3$  Hz, 2H), 7.43 – 7.36 (m, 2H), 7.33 – 7.27 (m, 2H), 7.25 – 7.19 (m, 9H), 7.15 (dd,  $J = 6.6, 2.8$  Hz, 6H), 6.15 (ddt,  $J = 16.6, 11.1, 5.9$  Hz, 1H), 6.05 (ddt,  $J = 16.4, 10.8, 5.6$  Hz, 1H), 5.52 (dd,  $J = 20.3, 12.4$  Hz, 2H), 5.45 – 5.39 (m, 2H), 5.29 (d,  $J = 7.1$  Hz, 1H), 4.82 (d,  $J = 5.7$  Hz, 3H), 4.75 (p,  $J = 6.1$  Hz, 1H), 4.71 (d,  $J = 5.9$  Hz, 2H), 4.60 (qd,  $J = 10.8, 6.3$  Hz, 3H), 4.25 (t,  $J = 6.3$  Hz, 1H), 3.60 (s, 3H), 1.38 (dd,  $J = 6.2, 3.0$  Hz, 6H); ESI-MS [ $\text{M} + \text{H}$ ] $^+$ :  $m/z$  1139.12

Allyl 4-(2-(allyloxy)-4-(4-((2S,3R)-2-amino-3-methoxy-4-oxo-4-(tritylamino)butanamido)benzamido)-3-isopropoxybenzamido)benzoate (**S22**)

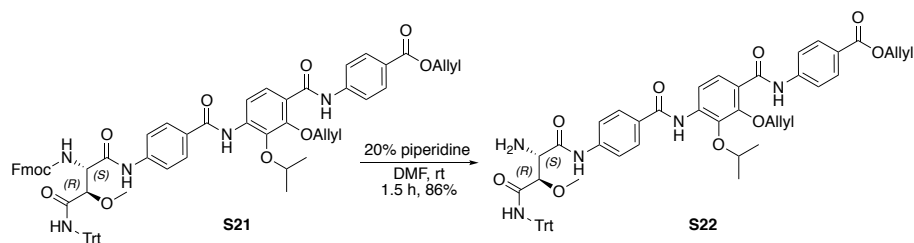

The reaction procedure was the same as described for compound **S9**. The product **S22** was obtained as a clear oil (10.3 mg, 11.0  $\mu\text{mol}$ , 86%).

$^1\text{H NMR}$  (600 MHz,  $\text{CDCl}_3$ )  $\delta$  10.21 (s, 1H), 9.44 (s, 1H), 8.72 (s, 1H), 8.50 (d,  $J = 8.9$  Hz, 1H), 8.07 (d,  $J = 8.6$  Hz, 3H), 7.86 – 7.82 (m, 3H), 7.77 (d,  $J = 8.4$  Hz, 2H), 7.65 (d,  $J = 8.3$  Hz, 2H), 7.34 – 7.25 (m, 3H), 7.27 – 7.22 (m, 3H), 7.22 (d,  $J = 7.6$  Hz, 6H), 6.15 (ddt,  $J = 16.6, 11.1, 5.9$  Hz, 1H), 6.05 (ddt,  $J = 16.4, 10.9, 5.6$  Hz, 1H), 5.50 (d,  $J = 17.1$  Hz, 1H), 5.45 – 5.39 (m, 2H), 5.29 (d,  $J = 7.9$  Hz, 2H), 4.82 (d,  $J = 5.6$  Hz, 2H), 4.72 (dd,  $J = 17.3, 6.0$  Hz, 3H), 4.47 (d,  $J = 3.2$  Hz, 1H), 3.83 (d,  $J = 3.2$  Hz, 1H), 3.58 (s, 3H), 1.65 (s, 2H), 1.57 (d,  $J = 5.6$  Hz, 1H), 1.38 (dd,  $J = 6.2, 3.7$  Hz, 6H); ESI-MS [ $\text{M} + \text{H}$ ] $^+$ :  $m/z$  916.65

Allyl 4-(2-(allyloxy)-4-(4-((2S,3R)-2-(4-((S)-3-(4-(allyloxy)phenyl)-2-((tert-butoxycarbonyl)amino)propanamido)benzamido)-3-methoxy-4-oxo-4-(tritylamino)butanamido)benzamido)-3-isopropoxybenzamido)benzoate (**S23**)

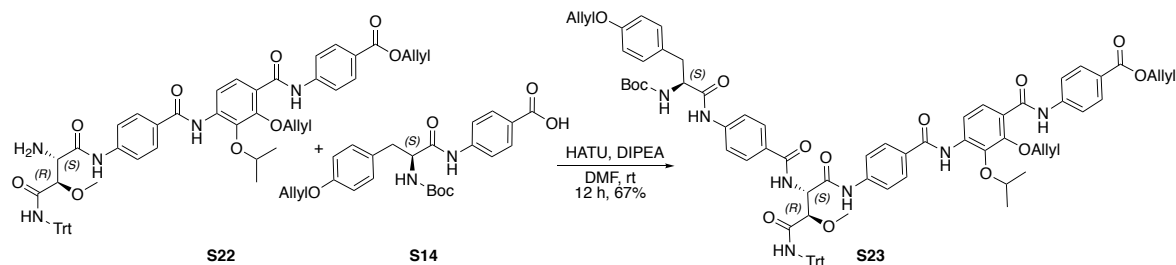

The reaction procedure was the same as described for compound **S15**. The product **S23** was obtained as a clear oil (5.00 mg, 3.74  $\mu\text{mol}$ , 67%).

$^1\text{H NMR}$  (600 MHz,  $\text{CDCl}_3$ )  $\delta$  10.21 (s, 1H), 9.34 (s, 1H), 8.73 (s, 1H), 8.50 (d,  $J = 8.9$  Hz, 1H), 8.10 (s, 1H), 8.07 (d,  $J = 4.6$  Hz, 3H), 7.84 (d,  $J = 8.3$  Hz, 2H), 7.76 (d,  $J = 8.4$  Hz, 2H), 7.62 (dd,  $J = 22.3, 8.1$  Hz, 4H), 7.47 (s, 1H), 7.42 (d,  $J = 8.4$  Hz, 2H), 7.17 (p,  $J = 9.1, 8.4$  Hz, 17H), 6.86 (d,  $J = 8.2$  Hz, 2H), 6.14 (ddt,  $J = 16.5, 11.0, 5.9$  Hz, 1H), 6.04 (dddd,  $J = 22.9, 12.6, 10.7, 5.4$  Hz, 2H), 5.50 (d,  $J = 17.1$  Hz, 1H), 5.45 – 5.36 (m, 3H), 5.28 (t,  $J = 11.4$  Hz, 2H), 5.10 (s, 1H), 4.88 (t,  $J = 6.5$  Hz, 1H), 4.82 (d,  $J = 5.7$  Hz, 2H), 4.74 (p,  $J = 6.1$  Hz, 1H), 4.70 (d,  $J = 5.9$  Hz, 2H), 4.58 (d,  $J = 6.7$  Hz, 1H), 4.50 (d,  $J = 5.3$  Hz, 2H), 4.44 (s, 1H), 3.65 (d,  $J = 3.5$  Hz, 3H), 3.10 (d,  $J = 7.0$  Hz, 2H), 2.80 (s, 1H), 2.61 (s, 1H), 1.44 (s, 9H), 1.38 (d,  $J = 6.1$  Hz, 6H); HRMS (ESI):  $m/z$  calculated for  $\text{C}_{78}\text{H}_{80}\text{N}_7\text{O}_{14}$  [ $\text{M} + \text{H}$ ] $^+$ : 1338.5763; observed 1338.5660

4-(4-(4-((2S,3R)-4-amino-2-(4-((S)-2-amino-3-(4-hydroxyphenyl)propanamido)benzamido)-3-methoxy-4-oxobutanamido)benzamido)-2-hydroxy-3-isopropoxybenzamido)benzoic acid (**S24**)



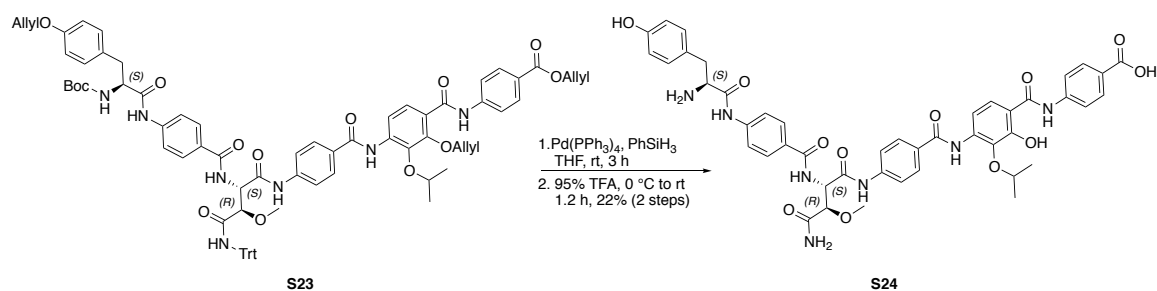

The reaction procedure was the same as described for compound **S16**. The product **S24** was obtained as a white solid (0.700 mg, 0.80  $\mu\text{mol}$ , 22% over 2 steps).

$^1\text{H}$  NMR (600 MHz,  $\text{DMSO-}d_6$ )  $\delta$  10.53 (s, 1H), 8.89 (s, 1H), 7.93 (d,  $J = 8.2$  Hz, 1H), 7.88 – 7.80 (m, 3H), 7.75 (d,  $J = 8.2$  Hz, 2H), 7.73 – 7.69 (m, 1H), 7.59 – 7.54 (m, 2H), 7.47 – 7.44 (m, 2H), 7.30 (d,  $J = 8.2$  Hz, 1H), 7.10 (dd,  $J = 11.2, 8.4$  Hz, 2H), 7.02 (d,  $J = 8.1$  Hz, 1H), 6.71 (d,  $J = 8.0$  Hz, 1H), 6.65 (d,  $J = 8.1$  Hz, 1H), 5.00 (p,  $J = 6.1$  Hz, 1H), 4.92 (dt,  $J = 23.1, 8.1$  Hz, 1H), 4.09 (t,  $J = 7.5$  Hz, 1H), 4.03 (q,  $J = 7.1$  Hz, 1H), 3.31 (s, 3H), 2.89 (dd,  $J = 13.7, 5.5$  Hz, 1H), 2.76 (dd,  $J = 14.2, 8.7$  Hz, 1H), 1.20 (d,  $J = 6.2$  Hz, 6H);  $^{13}\text{C}$  NMR (151 MHz,  $\text{DMSO-}d_6$ )  $\delta$  170.40, 166.85, 165.36, 163.15, 162.82, 130.21, 129.68, 128.38, 127.64, 119.12, 117.52, 116.09, 115.00, 79.98, 78.01, 72.30, 70.38, 59.80, 57.77, 57.43, 57.18, 34.22, 31.00, 28.52, 28.08, 26.70, 24.81, 22.72, 22.11, 20.81, 20.65, 14.12, 14.02, 11.30; HRMS (ESI):  $m/z$  calculated for  $\text{C}_{45}\text{H}_{46}\text{N}_7\text{O}_{12}^+$  [ $\text{M} + \text{H}$ ] $^+$ : 876.3204; observed 876.3159

## Total synthesis of PABA34

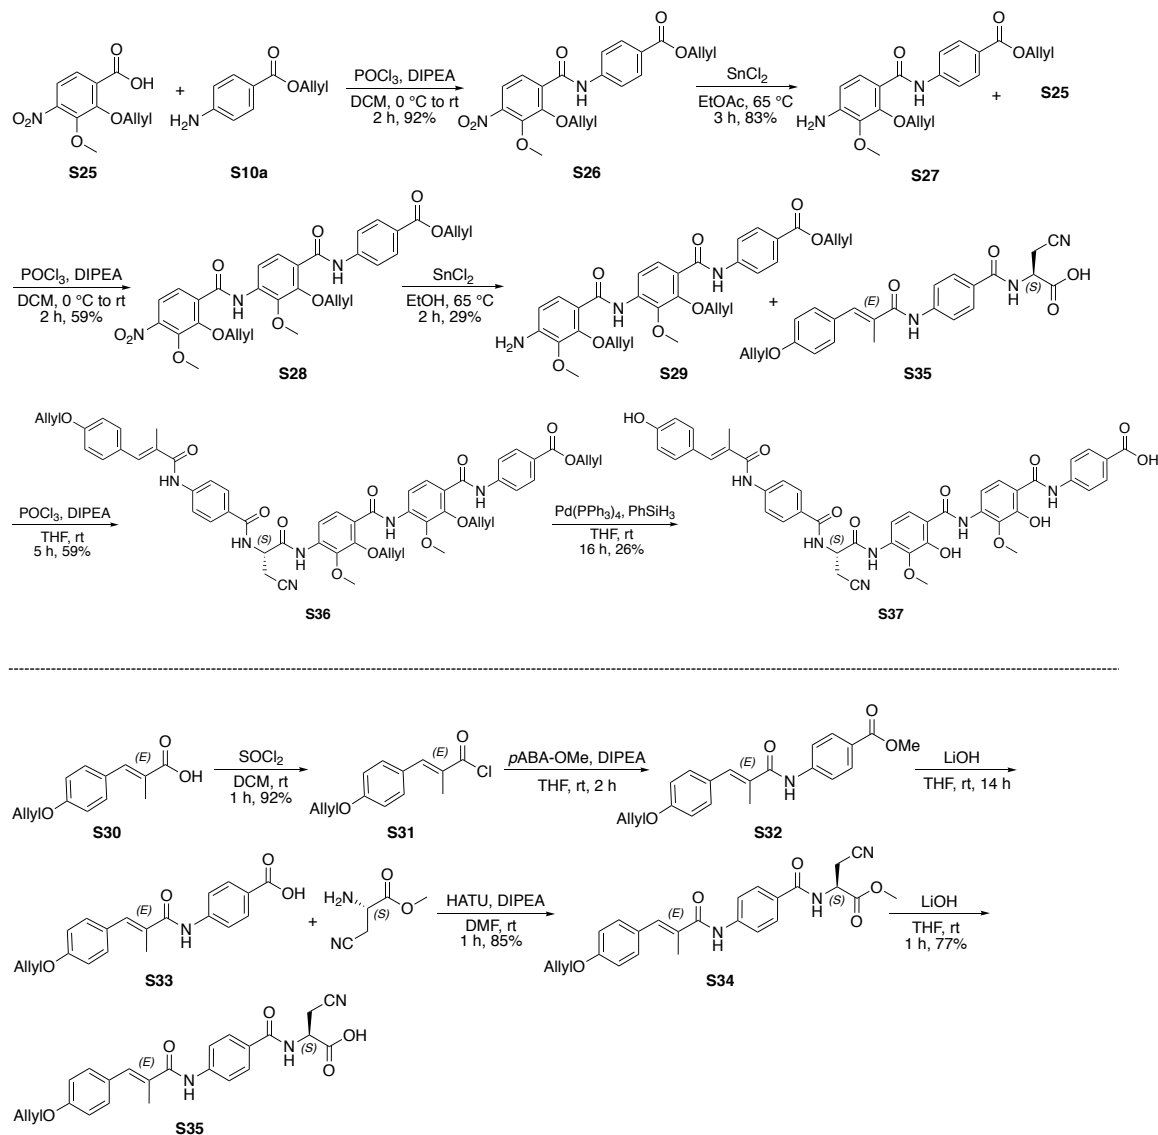

Scheme S4. Synthetic pathway for the preparation of PABA34 (**S37**).

### Allyl 4-(2-(allyloxy)-3-methoxy-4-nitrobenzamido)benzoate (**S26**)

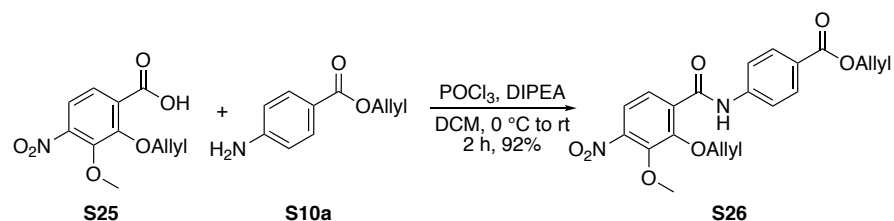

Building block 2-(allyloxy)-3-methoxy-4-nitrobenzoic acid (**S25**) was prepared according to previously reported protocols.<sup>[14]</sup>

Compound **S25** (2.00 g, 3.01 mmol) was dissolved in DCM (20.0 mL) followed by the addition of  $\text{POCl}_3$  (1.45 g, 9.48 mmol) and DIPEA (2.75 mL, 15.8 mmol) at 0 °C. Compound **S10a** (1.40 g, 7.90 mmol) was added and the reaction mixture was stirred at room temperature for 2 h. The reaction was quenched with saturated  $\text{NaHCO}_3$  and extracted with DCM (3x). The combined organic phases were washed with brine (1x), dried over  $\text{Na}_2\text{SO}_4$ , and concentrated. Crude material was purified via manual flash column chromatography (Pet. Ether/EtOAc 15:1 to 10:1) to afford (**S26**) as a yellow solid (3.00 g, 7.27 mmol, 92%).

$^1\text{H NMR}$  (400 MHz,  $\text{CDCl}_3$ )  $\delta$  10.05 (s, 1H), 8.04 – 8.01 (m, 3H), 7.69 – 7.67 (d,  $J = 8$  Hz, 2H), 7.60 – 7.58 (m, 1H), 6.12 – 5.99 (m, 2H), 5.45 – 5.22 (m, 4H), 4.77 – 4.75 (d,  $J = 8$  Hz, 2H), 4.71 – 4.69 (d,  $J = 8$  Hz, 2H), 4.07 (s, 3H); ESI-MS  $[\text{M} + \text{H}]^+$ :  $m/z$  413.30

Allyl 4-(2-(allyloxy)-4-amino-3-methoxybenzamido)benzoate (S27)

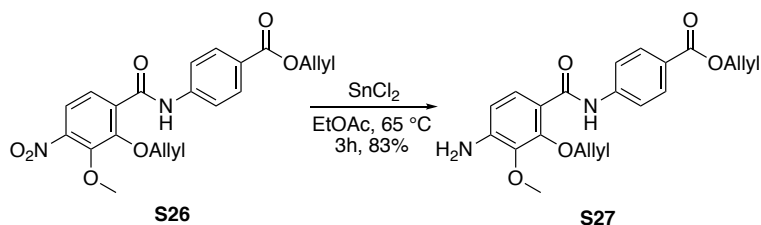

Compound **S26** (1.50 g, 3.64 mmol) was dissolved in EtOAc (15.0 mL) followed by the addition of  $\text{SnCl}_2 \cdot 2\text{H}_2\text{O}$  (4.10 g, 18.2 mmol) and the mixture was stirred at 60–65 °C for 3 h. After quenching with saturated  $\text{NaHCO}_3$ , the aqueous layer was extracted with EtOAc (3x) and the combined organic phases were washed with brine (1x) and dried over  $\text{Na}_2\text{SO}_4$ . After concentrating *in vacuo*, the crude material was purified via manual flash column chromatography (Pet. ether/EtOAc 15:1 to 6:1) to afford **S27** as a yellow solid (1.15 g, 3.01 mmol, 83%).

$^1\text{H NMR}$  (400 MHz,  $\text{DMSO}-d_6$ )  $\delta$  10.26 (s, 1H), 7.97 – 7.95 (d,  $J = 8$  Hz, 2H), 7.83 – 7.81 (d,  $J = 8$  Hz, 2H), 7.40 – 7.38 (d,  $J = 8$  Hz, 1H), 6.58 – 6.54 (d,  $J = 16$  Hz, 1H), 6.09 – 6.05 (m, 2H), 5.74 (s, 2H), 5.48 – 5.39 (m, 2H), 5.29 – 5.27 (d,  $J = 8$  Hz, 2H), 4.80 – 4.78 (d,  $J = 8$  Hz, 2H), 4.66 – 4.64 (d,  $J = 8$  Hz, 2H), 3.76 (s, 3H); ESI-MS  $[\text{M} + \text{H}]^+$ :  $m/z$  383.30

Allyl 4-(2-(allyloxy)-4-(2-(allyloxy)-3-methoxy-4-nitrobenzamido)-3-methoxybenzamido)benzoate (S28)

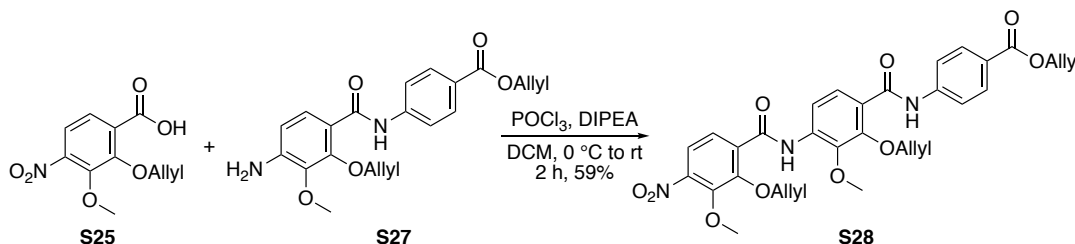

Compound **S25** (761 mg, 3.01 mmol) was dissolved in DCM (10.0 mL) followed by the addition of  $\text{POCl}_3$  (0.336 mL, 3.61 mmol) and DIPEA (1.05 mL, 6.01 mmol) at  $0^\circ\text{C}$ . Dimer **S27** (1.15 g, 3.01 mmol) was added and the reaction mixture was stirred at room temperature for 2 h. The reaction mixture was poured into a solution of saturated  $\text{NaHCO}_3$  and extracted with DCM (3x). The combined organic phases were washed with brine (1x), dried over  $\text{Na}_2\text{SO}_4$ , and concentrated. Crude material was purified via manual flash column chromatography (Pet. Ether/EtOAc 10:1 to 3:1) to afford **S28** as a yellow solid (1.10 g, 1.78 mmol, 59%).

$^1\text{H NMR}$  (400 MHz,  $\text{CDCl}_3$ )  $\delta$  10.56 (s 1H), 10.41 (s, 1H), 8.18 – 8.16 (d,  $J = 8$  Hz, 1H), 8.01 – 7.91 (m, 2H), 7.89 – 7.87 (d,  $J = 8$  Hz, 2H), 7.80 – 7.78 (d,  $J = 8$  Hz, 1H), 7.76 – 7.75 (m, 1H), 7.46 – 7.44 (d,  $J = 8$  Hz, 1H), 6.07 – 6.03 (m, 3H), 5.44 – 5.38 (m, 3H), 5.30 – 5.27 (m, 3H), 4.81 – 4.76 (m, 4H), 4.62 – 4.61 (d,  $J = 4$  Hz, 2H), 4.00 (s, 3H), 3.93 (s, 3H); ESI-MS  $[\text{M} + \text{H}]^+$ :  $m/z$  618.00

allyl 4-(2-(allyloxy)-4-(2-(allyloxy)-4-amino-3-methoxybenzamido)-3-methoxybenzamido)benzoate (S29)

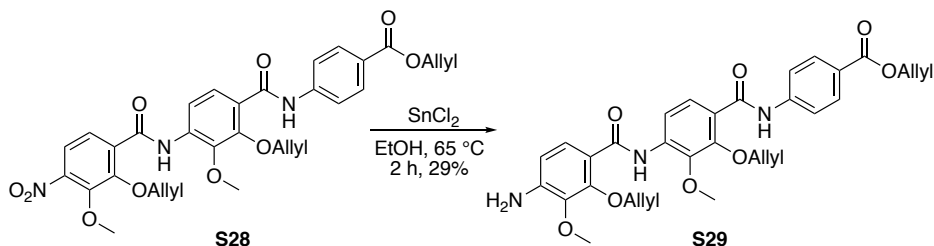

Compound **S28** (1.10 g, 1.78 mmol) was dissolved in EtOH (30.0 mL) followed by the addition of  $\text{SnCl}_2 \cdot 2\text{H}_2\text{O}$  (2.01 g, 8.91 mmol) and the mixture was stirred at 60–65 °C for 2 h. The solvent was evaporated *in vacuo* and the crude residue was dissolved in EtOAc (400 mL). The organic layer was washed with saturated  $\text{NaHCO}_3$  (3x) followed by brine (1x) and dried over  $\text{Na}_2\text{SO}_4$ . After concentrating *in vacuo*, the crude material was purified via manual flash column chromatography (Pet. ether/EtOAc 5:1 to 2:1) to afford tripeptide **S29** as a yellow solid (300 mg, 0.510 mmol, 29%).

$^1\text{H NMR}$  (400 MHz,  $\text{CDCl}_3$ )  $\delta$  10.60 (s 1H), 10.50 (s, 1H), 8.38 – 8.36 (d,  $J = 8$  Hz, 1H), 8.00 – 7.98 (d,  $J = 8$  Hz, 2H), 7.88 – 7.86 (d,  $J = 8$  Hz, 2H), 7.60 – 7.58 (d,  $J = 8$  Hz, 1H), 7.44 – 7.42 (d,  $J = 8$  Hz, 1H), 7.46 – 7.44 (d,  $J = 8$  Hz, 1H), 6.58 – 6.56 (d,  $J = 8$  Hz, 1H), 6.17 – 6.04 (m, 3H), 5.86 (s, 2H), 5.43 – 5.38 (m, 3H), 5.30 – 5.27 (m, 3H), 4.80 – 4.79 (d,  $J = 4$  Hz, 4H), 4.63 – 4.61 (d,  $J = 8$  Hz, 2H), 3.95 (s, 3H), 3.76 (s, 3H); ESI-MS  $[\text{M} + \text{H}]^+$ :  $m/z$  588.20

Methyl (E)-4-(3-(4-(allyloxy)phenyl)-2-methylacrylamido)benzoate (S32)

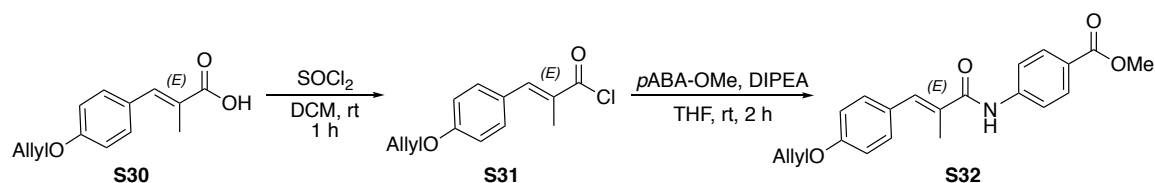

Building block (*E*)-3-(4-(allyloxy)phenyl)-2-methylacrylic acid (**S30**) was prepared according to previously reported protocols.<sup>[14, 15]</sup>

Compound **S30** (300 mg, 1.37 mmol) was dissolved in DCM (10.0 mL) followed by the dropwise addition of SOCl<sub>2</sub> (0.50 mL, 6.87 mmol). The mixture was stirred at room temperature for 1 h before concentrating *in vacuo* and the crude residue dissolved in THF (10.0 mL). Methyl 4-aminobenzoate (180 mg, 1.19 mmol) and DIPEA (1.20 mL, 6.87 mmol) were added to the mixture and stirred for another 2 h at room temperature. The reaction mixture was poured into a solution of saturated NH<sub>4</sub>Cl (50.0 mL) and extracted with EtOAc (3x). The combined organic phases were washed with brine (1x), dried over Na<sub>2</sub>SO<sub>4</sub>, and concentrated. The crude compound **S32** (0.600 g, crude) was obtained as a yellow solid.

(*E*)-4-(3-(4-(allyloxy)phenyl)-2-methylacrylamido)benzoic acid (**S33**)

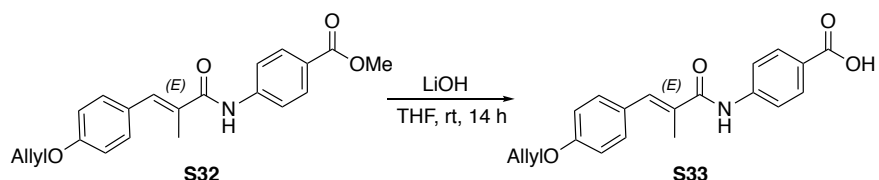

Methyl ester **S32** (500 mg, 1.42 mmol) was dissolved in THF (10.0 mL) followed by the addition of LiOH · H<sub>2</sub>O (0.50 M, 8.54 mL) and the mixture stirred for 14 h at room temperature. The reaction was acidified to pH 2-3 with 1 M HCl followed by extraction with EtOAc (3x). The combined organic layers were washed with brine (1x), dried over Na<sub>2</sub>SO<sub>4</sub>, and concentrated *in vacuo*. The crude compound **S33** (500 mg, crude) was obtained as a white solid.

<sup>1</sup>H NMR (400 MHz, DMSO-*d*<sub>6</sub>) δ 12.68 (s, 1H), 10.17 (s, 1H), 7.90 (d, *J* = 8.9 Hz, 2H), 7.84 (d, *J* = 8.8 Hz, 2H), 7.45 (d, *J* = 8.7 Hz, 2H), 7.29 (s, 1H), 7.03 (d, *J* = 8.7 Hz, 2H), 6.06 (ddt, *J* = 17.4, 10.5, 5.2 Hz, 1H), 5.42 (dq, *J* = 17.3, 1.8 Hz, 1H), 5.28 (dq, *J* = 10.5, 1.5 Hz, 1H), 4.61 (dt, *J* = 5.3, 1.6 Hz, 2H), 2.12 (d, *J* = 1.4 Hz, 3H); ESI-MS [*M* + *H*]<sup>+</sup>: *m/z* 338.00

Methyl (*S,E*)-2-(4-(3-(4-(allyloxy)phenyl)-2-methylacrylamido)benzamido)-3-cyanopropanoate (**S34**)

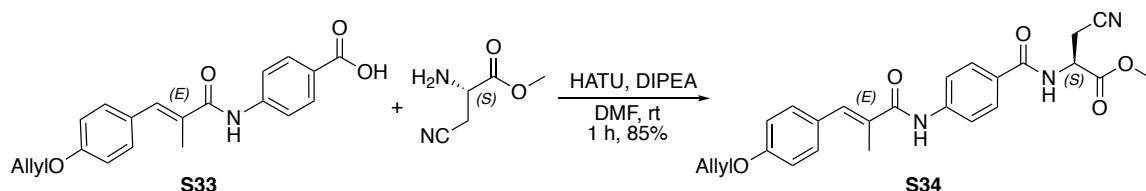

Compound **S33** (400 mg, 1.19 mmol) and methyl (2*S*)-2-amino-3-cyano-propanoate (430 mg, 1.78 mmol, 1.50 eq TFA) were dissolved in DMF (10.0 mL) followed by the addition of DIPEA (0.62 mL, 3.56 mmol) and HATU (541 mg, 1.42 mmol). The mixture stirred for 1 h at room temperature before diluting with H<sub>2</sub>O (50.0 mL) and extracted with EtOAc (3x). The combined organic phases were washed with brine (1x), dried over Na<sub>2</sub>SO<sub>4</sub>, and concentrated *in vacuo*. The residue was purified via manual flash column chromatography (Pet. ether/EtOAc 3:1 to 1:1) to afford **S34** as a white solid (450 mg, 1.01 mmol, 85%).

<sup>1</sup>H NMR (400 MHz, CDCl<sub>3</sub>) δ 7.87 – 7.80 (m, 2H), 7.77 – 7.69 (m, 3H), 7.41 – 7.33 (m, 3H), 7.04 (d, *J* = 6.4 Hz, 1H), 7.00 – 6.92 (m, 2H), 6.07 (ddt, *J* = 17.3, 10.5, 5.3 Hz, 1H), 5.44 (dq, *J* = 17.3, 1.6 Hz, 1H), 5.36 – 5.28 (m, 1H), 4.95 (td, *J* = 5.5, 4.2 Hz, 1H), 4.58 (dt, *J* = 5.3, 1.5 Hz, 2H), 3.91 (s, 3H), 3.23 (dd, *J* = 17.0, 5.4 Hz, 1H), 3.07 (dd, *J* = 17.0, 4.3 Hz, 1H), 2.24 (d, *J* = 1.4 Hz, 3H); ESI-MS [*M* + *H*]<sup>+</sup>: *m/z* 448.20

(*S,E*)-2-(4-(3-(4-(allyloxy)phenyl)-2-methylacrylamido)benzamido)-3-cyanopropanoic acid (**S35**)

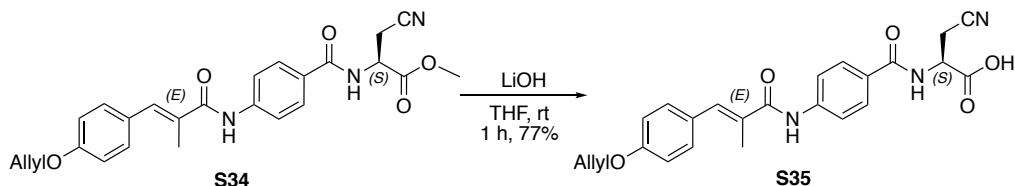

Compound **S34** (0.400 g, 0.894 mmol) was dissolved in a mixture of dioxane (10.0 mL) and H<sub>2</sub>O (5.0 mL) followed by the addition of LiOH · H<sub>2</sub>O (56.2 mg, 1.34 mmol). After stirring at room temperature for 1 h, EtOAc (20.0 mL) was added to the reaction mixture and the pH was adjusted to 3-4 with 1 M HCl. The mixture was extracted with EtOAc (3x), washed with brine (1x), dried over Na<sub>2</sub>SO<sub>4</sub>, and concentrated *in vacuo*. The residue was purified by prep RP-HPLC (32-62% ACN/H<sub>2</sub>O) to afford **S35** as a white solid (300 mg, 0.692 mmol, 77%).

<sup>1</sup>H NMR (400 MHz, DMSO-*d*<sub>6</sub>) δ 10.14 (s, 1H), 8.96 (d, *J* = 7.9 Hz, 1H), 7.90 – 7.80 (m, 4H), 7.49 – 7.41 (m, 2H), 7.30 (s, 1H), 7.07 – 6.99 (m, 2H), 6.06 (ddt, *J* = 17.3, 10.5, 5.2 Hz, 1H), 5.42 (dq, *J* = 17.3, 1.7 Hz, 1H), 5.32 – 5.24 (m, 1H), 4.70 (td, *J* = 8.5, 5.5 Hz, 1H), 4.61 (dt, *J* = 5.3, 1.6 Hz, 2H), 3.15 – 2.97 (m, 2H), 2.13 (s, 3H); ESI-MS [M + H]<sup>+</sup>: *m/z* 434.00

Allyl (S,E)-4-(2-(allyloxy)-4-(2-(allyloxy)-4-(2-(4-(3-(4-(allyloxy)phenyl)-2-methylacrylamido)benzamido)-3-cyanopropanamido)-3-methoxybenzamido)-3-methoxybenzamido)benzoate (S36)

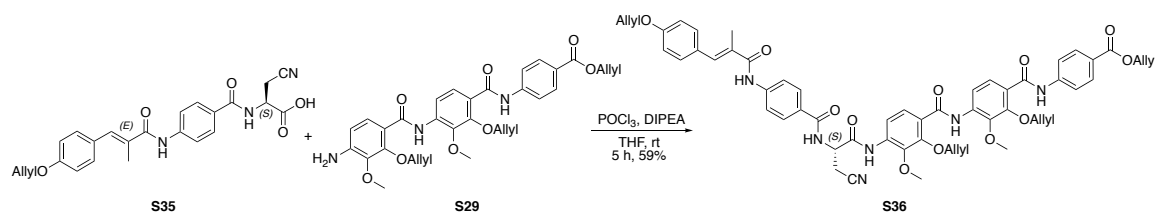

Compound **S35** (90.0 mg, 0.208 mmol) and compound **S29** (0.100 g, 0.170 mmol) were dissolved in THF (10.0 mL) followed by the addition of  $\text{POCl}_3$  (47.60  $\mu\text{L}$ , 0.510 mmol) and DIPEA (88.8  $\mu\text{L}$ , 0.510 mmol). After stirring at room temperature for 5 h the reaction was quenched with a solution of saturated  $\text{NaHCO}_3$  (15.0 mL) and extracted with DCM (3x). The organic layer was washed with brine (1x), dried over  $\text{Na}_2\text{SO}_4$ , and concentrated *in vacuo*. The residue was purified via prep RP-HPLC (72-100% ACN/ $\text{H}_2\text{O}$ ) resulting in compound **S36** as a brown solid (0.100 g, 99.7  $\mu\text{mol}$ , 59%). Presence of coupled linear species confirmed via MS and carried forward to the final deprotection step. ESI-MS  $[\text{M} + \text{H}]^+$ :  $m/z$  1003.00

(S,E)-4-(4-(4-(3-cyano-2-(4-(3-(4-hydroxyphenyl)-2-methylacrylamido)benzamido)propanamido)-2-hydroxy-3-methoxybenzamido)-2-hydroxy-3-methoxybenzamido)benzoic acid (S37)

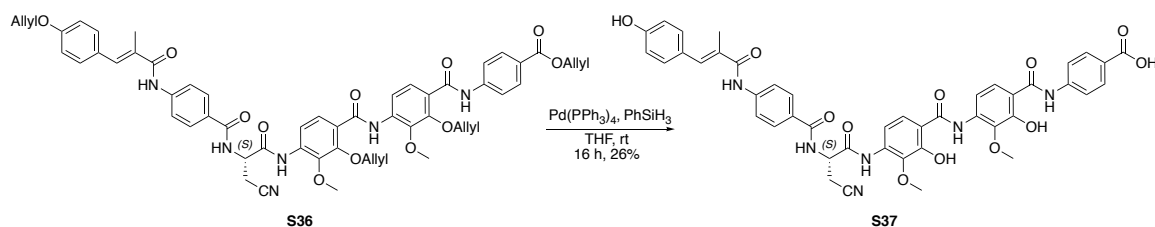

Linear species **S36** (90.0 mg, 0.897 mmol) was dissolved in THF (5.00 mL) followed by the addition of  $\text{Pd}(\text{PPh}_3)_4$  (25.9 mg, 0.224 mmol) and phenylsilane (38.8 mg, 0.359 mmol). The reaction mixture was stirred at room temperature for 16 h under an atmosphere of  $\text{N}_2$ . After removal of all volatile components, the crude residue was purified by RP-HPLC ( $\text{H}_2\text{O}/\text{ACN}+0.1\% \text{TFA}$ ) resulting in **S37** as a white solid (20.0 mg, 23.7  $\mu\text{mol}$ , 26%).

$^1\text{H}$  NMR (600 MHz,  $\text{DMSO}-d_6$ )  $\delta$  12.79 (s, 1H), 12.26 (s, 1H), 11.61 (s, 1H), 11.12 (s, 1H), 10.58 (s, 1H), 10.13 (s, 1H), 9.76 (d,  $J = 11.5$  Hz, 2H), 9.15 (d,  $J = 7.6$  Hz, 1H), 8.07 (d,  $J = 8.8$  Hz, 1H), 7.96 (dd,  $J = 17.3, 8.4$  Hz, 4H), 7.87 (t,  $J = 8.0$  Hz, 5H), 7.82 (s, 2H), 7.37 (d,  $J = 8.4$  Hz, 2H), 7.28 (s, 1H), 6.85 (d,  $J = 8.1$  Hz, 2H), 5.20 (q,  $J = 7.9$  Hz, 1H), 3.91 (s, 3H), 3.73 (s, 3H), 3.14 (qd,  $J = 17.0, 7.4$  Hz, 2H), 2.13 (s, 3H);  $^{13}\text{C}$  NMR (151 MHz,  $\text{DMSO}-d_6$ )  $\delta$  169.38, 168.97, 168.62, 167.34, 167.18, 163.79, 158.02, 153.95, 150.12, 143.41, 142.51, 138.27, 137.32, 137.28, 136.15, 134.43, 131.78, 130.69, 129.97, 128.80, 127.73, 127.01, 126.67, 126.54, 124.32, 121.05, 119.70, 118.81, 116.13, 115.87, 112.56, 112.17, 110.57, 61.20, 60.77, 51.09, 19.84, 15.01; HRMS (ESI):  $m/z$  calculated for  $\text{C}_{44}\text{H}_{39}\text{N}_6\text{O}_{12}^+$   $[\text{M} + \text{H}]^+$ : 843.2626; observed 843.2627



### Allyl 4-(2-(allyloxy)-3-methoxy-4-(4-nitrobenzamido)benzamido)benzoate (S38)

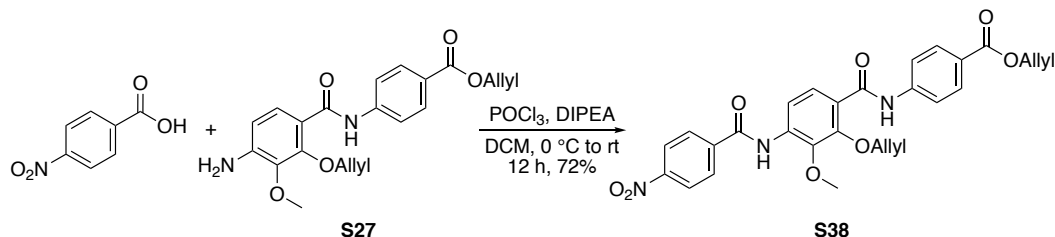

Compound **S27** (1.20 g, 3.14 mmol) and 4-nitrobenzoic acid (629 mg, 3.77 mmol) were dissolved in DCM (10.0 mL) followed by the addition of POCl<sub>3</sub> (0.438 mL, 4.71 mmol) and DIPEA (1.09 mL, 6.28 mmol) at 0 °C. After stirring at room temperature for 12 h, the reaction mixture was poured into a solution of saturated NaHCO<sub>3</sub> and extracted with DCM (3x). The combined organic phases were washed with brine (1x), dried over Na<sub>2</sub>SO<sub>4</sub>, and concentrated *in vacuo*. Crude material was purified via RP-HPLC (H<sub>2</sub>O/ACN+0.1% TFA) resulting in compound **S38** as a brown solid (1.20 g, 2.26 mmol, 72%).

<sup>1</sup>H NMR (400 MHz, CDCl<sub>3</sub>) δ 10.08 (s, 1H), 8.61 (s, 1H), 8.40 – 8.38 (d, *J* = 8 Hz, 1H), 8.33 – 8.31 (d, *J* = 8 Hz, 2H), 8.04 – 7.99 (m, 5H), 7.70 – 7.68 (d, *J* = 8 Hz, 2H), 6.11 – 5.97 (m, 2H), 5.47 – 5.33 (m, 3H), 5.24 – 5.21 (m, 1H), 4.76 – 4.75 (d, *J* = 4 Hz, 2H), 4.65 – 4.64 (d, *J* = 4 Hz, 2H), 3.99 (s, 3H); ESI-MS [M + H]<sup>+</sup>: *m/z* 532.20

### Allyl 4-(2-(allyloxy)-4-(4-aminobenzamido)-3-methoxybenzamido)benzoate (S39)

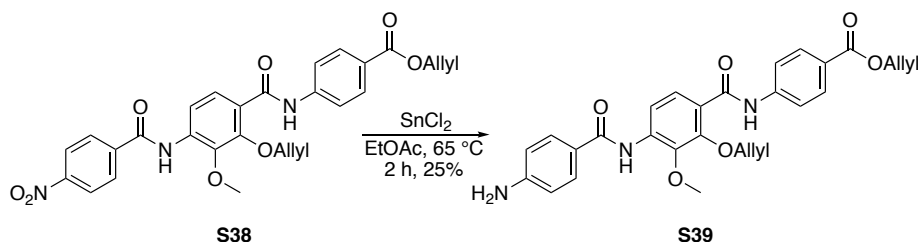

Compound **S38** (500 mg, 0.94 mmol) was dissolved in EtOAc (10.0 mL) followed by the addition of SnCl<sub>2</sub> · 2H<sub>2</sub>O (849 mg, 3.76 mmol) and the mixture was stirred at 65 °C for 2 h. After quenching with saturated NaHCO<sub>3</sub>, the aqueous layer was extracted with EtOAc (3x) and the combined organic phases were washed with brine (1x) and dried over Na<sub>2</sub>SO<sub>4</sub>. After concentrating *in vacuo*, the crude material was purified via prep RP-HPLC (55-75% ACN/H<sub>2</sub>O) resulting in tripeptide **S39** as a brown solid (120 mg, 0.239 mmol, 25%).

<sup>1</sup>H NMR (400 MHz, CDCl<sub>3</sub>) δ 10.21 (s, 1H), 8.57 (s, 1H), 8.48 (d, *J* = 9.2 Hz, 1H), 8.12 – 8.02 (m, 3H), 7.81 – 7.73 (m, 4H), 6.74 (d, *J* = 8.4 Hz, 2H), 6.21 – 6.15 (m, 1H), 6.11 – 6.01 (m, 1H), 5.52 (dd, *J* = 16.8, 1.2 Hz, 1H), 5.47 – 5.39 (m, 2H), 5.35 – 5.27 (m, 1H), 4.89 – 4.82 (m, 2H), 4.75 – 4.69 (m, 2H), 4.11 (s, 2H), 4.03 (s, 3H); ESI-MS [M + H]<sup>+</sup>: *m/z* 502.20

### Methyl (E)-4-(3-(4-(allyloxy)phenyl)acrylamido)benzoate (S42)

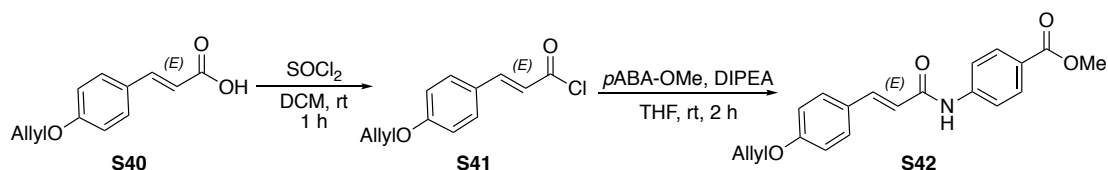

Building block (*E*)-3-(4-(allyloxy)phenyl)acrylic acid (**S40**) was prepared according to previously reported protocols.<sup>[15]</sup>

The reaction procedure was the same as reported for compound **S32**. The product **S42** was obtained as yellow solid (1.30 g, crude).

<sup>1</sup>H NMR (400 MHz, DMSO-*d*<sub>6</sub>) δ 10.45 (s, 1H), 7.98 – 7.90 (m, 2H), 7.87 – 7.79 (m, 2H), 7.62 – 7.54 (m, 3H), 7.07 – 7.00 (m, 2H), 6.70 (d, *J* = 15.7 Hz, 1H), 6.05 (ddt, *J* = 17.2, 10.4, 5.2 Hz, 1H), 5.41 (dq, *J* = 17.3, 1.8 Hz, 1H), 5.27 (ddq, *J* = 9.4, 4.7, 1.6 Hz, 1H), 4.63 (dt, *J* = 5.2, 1.6 Hz, 2H), 3.83 (s, 3H); ESI-MS [M + H]<sup>+</sup>: *m/z* 338.00

### (E)-4-(3-(4-(allyloxy)phenyl)acrylamido)benzoic acid (S43)



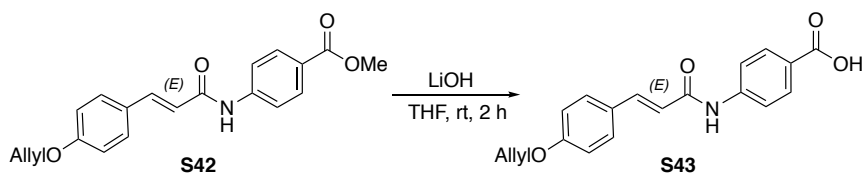

The reaction procedure was the same as described for compound **S33**, with the exception that the reaction was run for 2 h. The product **S43** was obtained as yellow solid (800 mg, crude).

$^1\text{H NMR}$  (400 MHz,  $\text{DMSO-}d_6$ )  $\delta$  12.69 (s, 1H), 10.43 (s, 1H), 7.96 – 7.88 (m, 2H), 7.84 – 7.78 (m, 2H), 7.63 – 7.54 (m, 3H), 7.04 (d,  $J$  = 8.8 Hz, 2H), 6.71 (d,  $J$  = 15.7 Hz, 1H), 6.06 (ddt,  $J$  = 17.3, 10.4, 5.1 Hz, 1H), 5.41 (ddd,  $J$  = 17.3, 4.0, 2.3 Hz, 1H), 5.28 (ddd,  $J$  = 10.6, 4.0, 2.4 Hz, 1H), 4.64 (dt,  $J$  = 5.3, 1.6 Hz, 2H); ESI-MS  $[\text{M} + \text{H}]^+$ :  $m/z$  324.00

Methyl (S,E)-2-(4-(3-(allyloxy)phenyl)acrylamido)benzamido-3-cyanopropanoate (S44)

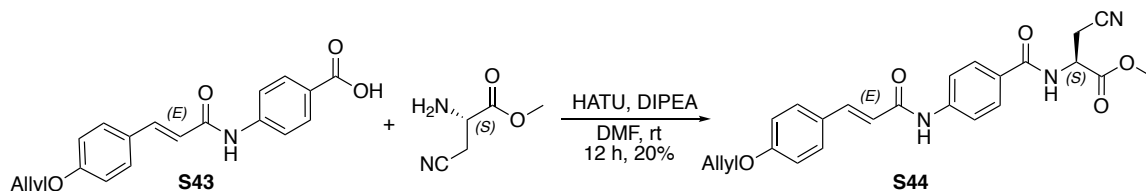

Compound **S43** (0.480g, 1.49 mmol) and methyl (2S)-2-amino-3-cyano-propanoate (0.300 g, 1.24 mmol) were dissolved in DMF (3.0 mL) followed by the addition of DIPEA (0.43 mL, 2.48 mmol) and HATU (565 mg, 1.49 mmol). The mixture stirred at room temperature for 12 h before concentrating *in vacuo*. The residue was purified via prep RP-HPLC (35-65% ACN/ $\text{H}_2\text{O}$ ) resulting in compound **S44** as a white solid (0.110 g, 0.254 mmol, 20%).

$^1\text{H NMR}$  (400 MHz,  $\text{DMSO-}d_6$ )  $\delta$  10.39 (s, 1H), 9.13 (d,  $J$  = 7.8 Hz, 1H), 7.87 (d,  $J$  = 8.9 Hz, 2H), 7.80 (d,  $J$  = 8.9 Hz, 2H), 7.62 – 7.53 (m, 3H), 7.07 – 7.00 (m, 2H), 6.70 (d,  $J$  = 15.7 Hz, 1H), 6.06 (ddt,  $J$  = 17.3, 10.5, 5.2 Hz, 1H), 5.41 (dq,  $J$  = 17.3, 1.8 Hz, 1H), 5.28 (dq,  $J$  = 10.5, 1.5 Hz, 1H), 4.80 (td,  $J$  = 8.4, 5.8 Hz, 1H), 4.63 (dt,  $J$  = 5.3, 1.6 Hz, 2H), 3.67 (s, 3H), 3.17 – 3.00 (m, 2H); ESI-MS  $[\text{M} + \text{H}]^+$ :  $m/z$  434.00

(S,E)-2-(4-(3-(allyloxy)phenyl)acrylamido)benzamido-3-cyanopropanoic acid (S45)

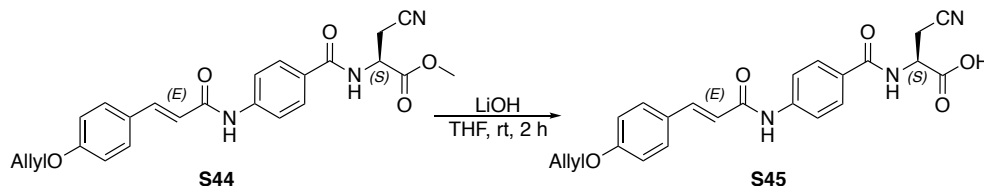

The reaction procedure was the same as described for compound **S35**. Following work-up, the deprotected product **S45** was obtained as white solid (0.100 g) and used without further purification.

$^1\text{H NMR}$  (400 MHz,  $\text{DMSO-}d_6$ )  $\delta$  10.39 (s, 1H), 8.96 (d,  $J$  = 7.9 Hz, 1H), 7.87 (d,  $J$  = 8.8 Hz, 2H), 7.80 (d,  $J$  = 8.7 Hz, 2H), 7.61 – 7.53 (m, 3H), 7.03 (d,  $J$  = 8.5 Hz, 2H), 6.70 (d,  $J$  = 15.7 Hz, 1H), 6.05 (ddt,  $J$  = 17.4, 10.5, 5.2 Hz, 1H), 5.46 – 5.36 (m, 1H), 5.28 (dd,  $J$  = 10.5, 1.7 Hz, 1H), 4.68 (td,  $J$  = 8.3, 5.5 Hz, 1H), 4.65 – 4.61 (m, 2H), 3.13 – 2.97 (m, 2H); ESI-MS  $[\text{M} + \text{H}]^+$ :  $m/z$  420.00

Allyl (S,E)-4-(2-(allyloxy)-4-(4-(2-(4-(3-(allyloxy)phenyl)acrylamido)benzamido)-3-cyanopropanamido)benzamido)-3-methoxybenzamido)benzoate (S46)

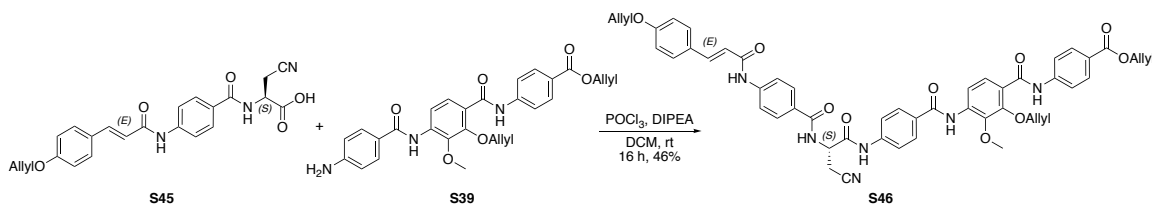

Compound **S45** (64.4 mg, 0.153 mmol) and compound **S39** (70.0 mg, 0.139 mmol) were dissolved in DCM (2.0 mL) followed by the addition of DIPEA (48.5  $\mu\text{L}$ , 0.279 mmol) and  $\text{POCl}_3$  (19.5  $\mu\text{L}$ , 0.209 mmol) at 0  $^\circ\text{C}$ . After stirring at room temperature for 16 h, the reaction was quenched with a solution of saturated  $\text{NaHCO}_3$  (5.0 mL) and extracted with DCM (3x). The organic layer was washed with brine (1x), dried over  $\text{Na}_2\text{SO}_4$ , and concentrated *in vacuo*. The residue was purified via prep RP-HPLC (65-95% ACN/ $\text{H}_2\text{O}$ ) resulting in compound **S46** as a yellow solid (58 mg, 64.2  $\mu\text{mol}$ , 46%). Presence of coupled linear species confirmed via MS and carried forward to the final deprotection step. ESI-MS  $[\text{M} + \text{H}]^+$ :  $m/z$  903.00

(S,E)-4-(4-(4-(3-cyano-2-(4-(3-(4-hydroxyphenyl)acrylamido)benzamido)propanamido)benzamido)-2-hydroxy-3-methoxybenzamido)benzoic acid (S47)

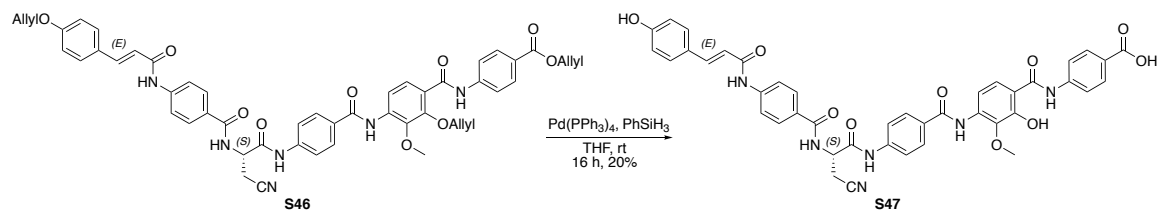

The reaction procedure was the same as described for compound **S37**. The product **S47** was obtained as white solid (10.5 mg, 12.8  $\mu\text{mol}$ , 20%).

$^1\text{H}$  NMR (600 MHz,  $\text{DMSO}-d_6$ )  $\delta$  12.52 (s, 2H), 10.56 (s, 1H), 10.37 (s, 1H), 9.97 (s, 1H), 9.36 (s, 1H), 9.01 (d,  $J = 7.7$  Hz, 1H), 7.94 (dd,  $J = 14.8, 8.4$  Hz, 6H), 7.84 – 7.77 (m, 6H), 7.70 (d,  $J = 8.5$  Hz, 1H), 7.53 (d,  $J = 15.5$  Hz, 1H), 7.47 (d,  $J = 8.3$  Hz, 2H), 7.43 – 7.39 (m, 1H), 6.83 (d,  $J = 8.2$  Hz, 2H), 6.64 (d,  $J = 15.6$  Hz, 1H), 4.98 (q,  $J = 8.1$  Hz, 1H), 3.86 (s, 3H), 3.15 (dd,  $J = 16.9, 5.4$  Hz, 1H), 3.07 (dd,  $J = 16.9, 8.8$  Hz, 1H), 3.01 (q,  $J = 7.4$  Hz, 1H);  $^{13}\text{C}$  NMR (151 MHz,  $\text{DMSO}-d_6$ )  $\delta$  168.16, 167.70, 166.13, 164.43, 164.36, 159.37, 157.82, 157.62, 142.60, 141.75, 141.03, 139.77, 135.26, 130.26, 129.65, 129.29, 128.62, 128.51, 127.64, 125.59, 123.37, 119.75, 119.01, 118.34, 118.27, 118.19, 116.34, 115.88, 114.09, 59.65, 50.58, 45.69, 39.94, 39.80, 39.66, 39.52, 39.38, 39.24, 39.10, 29.00, 19.98, 13.94; HRMS (ESI):  $m/z$  calculated for  $\text{C}_{42}\text{H}_{35}\text{N}_6\text{O}_{10}^+$  [ $\text{M} + \text{H}$ ] $^+$ : 783.2415; observed 783.2384

## Total synthesis of PABA95

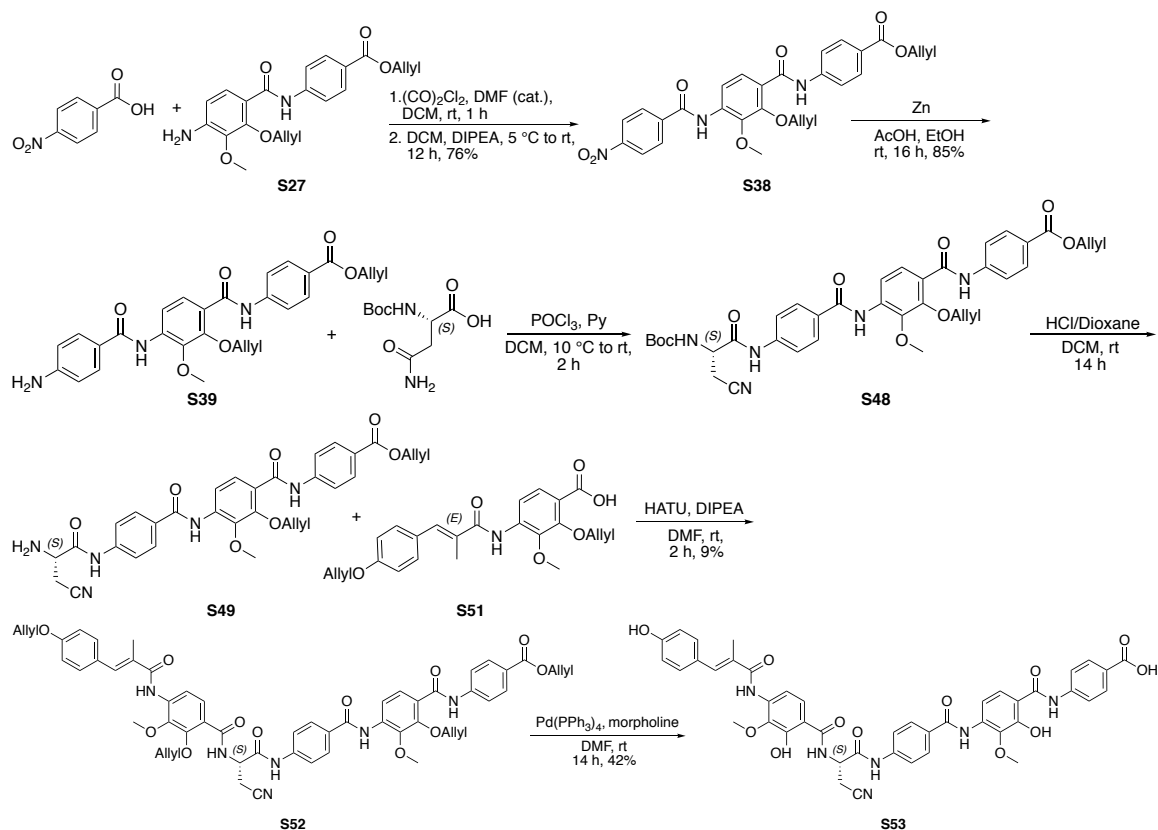

Scheme S6. Synthetic pathway for the preparation of PABA95 (**S53**).

### Allyl 4-(2-(allyloxy)-3-methoxy-4-(4-nitrobenzamido)benzamido)benzoate (**S38**)

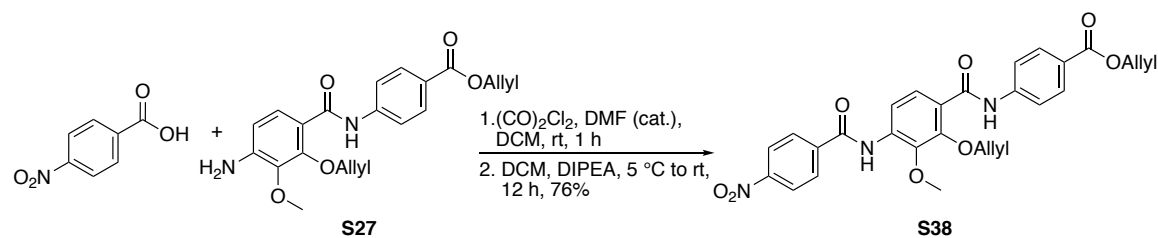

4-nitrobenzoic acid (0.500 g, 2.99 mmol) was dissolved in DCM (10.0 mL) followed by the addition of one drop of dry DMF and dropwise addition of oxalyl dichloride (524  $\mu\text{L}$ , 5.98 mmol). After stirring at room temperature for 1 h, the reaction was quenched with MeOH and concentrated *in vacuo*. Remaining reagents were co-evaporated with dry DCM and the crude aryl chloride was dissolved in 2.00 mL of dry DCM and added to a mixture of dipeptide **S27** (1.14 g, 2.99 mmol) and DIPEA (1.56 mL, 8.98 mmol) in DCM (10.0 mL) at 5 °C. The reaction mixture was stirred at room temperature for 12 h. After quenching with 0.50 mL of MeOH the solvent was removed *in vacuo*, resulting in crystallized trimer **S38** (1.20 g, 2.26 mmol, 76% yield) as a yellow solid.

$^1\text{H}$  NMR (400 MHz,  $\text{CDCl}_3$ )  $\delta$  10.16 (s, 1H), 8.70 (s, 1H), 8.46 (d,  $J = 8.8$  Hz, 1H), 8.42 – 8.35 (m, 2H), 8.12 – 8.05 (m, 5H), 7.84 – 7.71 (m, 2H), 6.24 – 6.13 (m, 1H), 6.12 – 5.98 (m, 1H), 5.53 (dd,  $J = 17.2, 1.2$  Hz, 1H), 5.47 – 5.44 (m, 1H), 5.43 – 5.39 (m, 1H), 5.34 – 5.28 (m, 1H), 4.83 (dt,  $J = 5.6, 1.2$  Hz, 2H), 4.73 (dt,  $J = 5.6, 1.2$  Hz, 2H), 4.07 (s, 3H); ESI-MS  $[\text{M} + \text{H}]^+$ :  $m/z$  532.2

Alllyl 4-(2-(allyloxy)-4-(4-aminobenzamido)-3-methoxybenzamido)benzoate (S39)

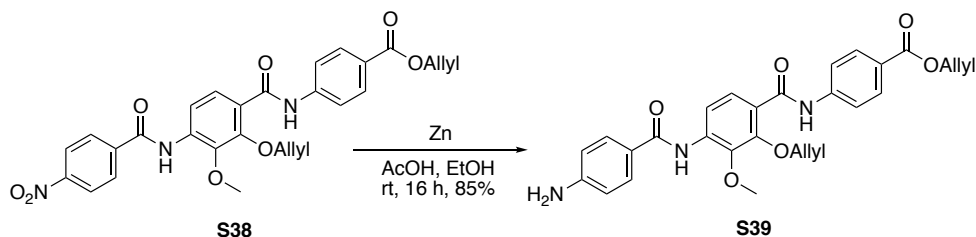

Nitrobenzoate **S38** (1.00 g, 1.88 mmol) was dissolved in a solution of 10% AcOH in EtOH (20.0 mL) and cooled to 5 °C. Zinc powder (2.46 g, 37.6 mmol) was added portionwise and the reaction was allowed to warm to room temperature and stirred for 16 h. The reaction mixture was filtered and the filtrate concentrated *in vacuo*. The crude residue was partitioned between saturated NaHCO<sub>3</sub> (10.0 mL) and DCM (10.0 mL). The organic phase was separated and concentrated *in vacuo*. Recrystallization from DCM/EtOAc (5 mL/3 mL) by evaporating the DCM afforded trimer **S39** (0.800 g, 1.60 mmol, 85%) as a white solid.

<sup>1</sup>H NMR (400 MHz, CDCl<sub>3</sub>) δ 10.21 (s, 1H), 8.57 (s, 1H), 8.48 (d, *J* = 9.2 Hz, 1H), 8.12–8.02 (m, 3H), 7.81–7.73 (m, 4H), 6.74 (d, *J* = 8.4 Hz, 2H), 6.21–6.15 (m, 1H), 6.11–6.01 (m, 1H), 5.52 (dd, *J* = 16.8, 1.2 Hz, 1H), 5.47–5.39 (m, 2H), 5.35–5.27 (m, 1H), 4.89–4.82 (m, 2H), 4.75–4.69 (m, 2H), 4.11 (s, 2H), 4.03 (s, 3H); ESI-MS [*M* + *H*]<sup>+</sup>: *m/z* 502.2

Alllyl (S)-4-(2-(allyloxy)-4-(4-(2-((*tert*-butoxycarbonyl)amino)-3-cyanopropanamido)benzamido)-3-methoxybenzamido)benzoate (S48)

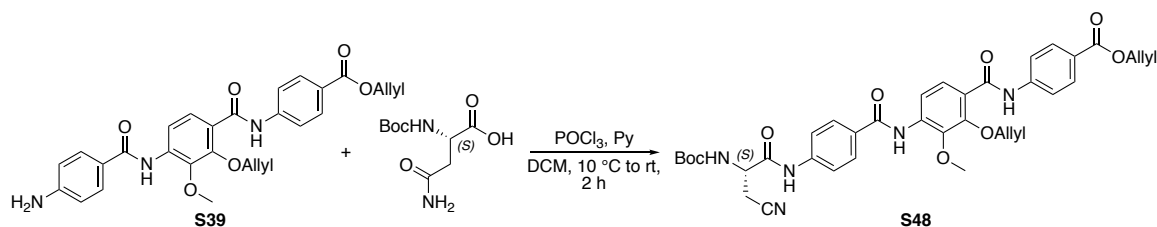

Tripeptide **S39** (0.80 g, 1.60 mmol) and Boc-Asn-OH (408 mg, 1.75 mmol) were dissolved in DCM (5.00 mL) followed by the addition of pyridine (773 μL, 9.57 mmol) and POCl<sub>3</sub> (341 μL, 3.67 mmol) at 10 °C. The reaction mixture was allowed to slowly warm to room temperature and stirred for 2 h. Following consumption of starting material, the reaction mixture was poured into 0.5 M NaHCO<sub>3</sub> (30.0 mL) and extracted with DCM (50.0 mL). The organic phase was separated and concentrated *in vacuo* to give crude product, which was re-crystallized from EtOAc/Pet. Ether (5 mL/10 mL) to afford intermediate **S48** (1.20 g, crude) as a yellow solid.

<sup>1</sup>H NMR (400 MHz, DMSO-*d*<sub>6</sub>) δ 10.63 (d, *J* = 23.8 Hz, 1H), 9.67 (s, 1H), (7.99–7.97 (m, 3H), 7.90–7.83 (m, 2H), 7.77 (dd, *J* = 11.9, 8.6 Hz, 2H), 7.72–7.65 (m, 1H), 7.58 (d, *J* = 8.2 Hz, 1H), 7.39 (d, *J* = 8.0 Hz, 1H), 6.09–6.02 (m, 2H), 5.43–5.38 (m, 2H), 5.28 (dd, *J* = 10.5, 1.5 Hz, 1H), 5.19 (dd, *J* = 10.5, 1.6 Hz, 1H), 4.79 (d, *J* = 5.4 Hz, 2H), 4.60 (d, *J* = 5.7 Hz, 2H), 4.53–4.46 (m, 1H), 3.89 (s, 3H), 3.03 (dd, *J* = 16.8, 5.1 Hz, 1H), 2.88 (dd, *J* = 16.8, 9.3 Hz, 1H), 1.42 (s, 9H); ESI-MS [*M* + *H*]<sup>+</sup>: *m/z* 698.30

Allyl (S)-4-(2-(allyloxy)-4-(4-(2-amino-3-cyanopropanamido)benzamido)-3-methoxybenzamido)benzoate (S49)

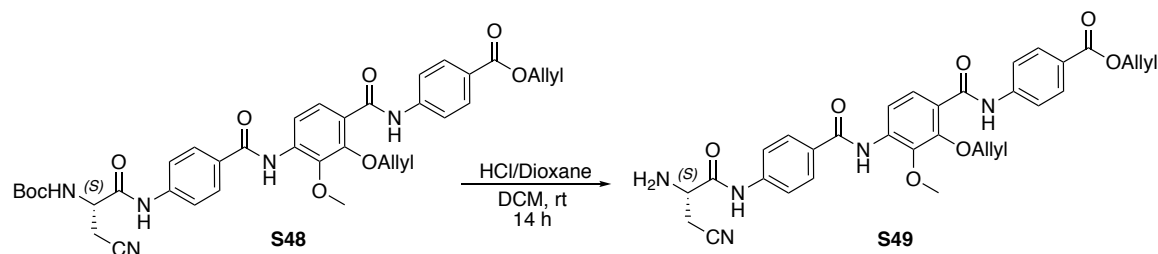

Boc-protected intermediate **S48** (1.20 g, 1.72 mmol) was dissolved in a mixture of HCl/dioxane (4 M, 4.30 mL) and DCM (50.0 mL) and stirred at room temperature for 14 h. The solvent was removed *in vacuo* to provide a residue which was triturated in DCM/Pet. Ether (10.0 mL/5.0 mL) to afford crude compound **S49** (1.10 g, HCl salt) as a yellow solid.

<sup>1</sup>H NMR (400 MHz, DMSO-*d*<sub>6</sub>) δ 10.58 (s, 1H), 9.66 (s, 1H), 7.99 (d, *J* = 8.8 Hz, 4H), 7.87 (d, *J* = 8.8 Hz, 2H), 7.81 (d, *J* = 8.8 Hz, 2H), 7.76 (d, *J* = 8.4 Hz, 1H), 7.39 (d, *J* = 8.4 Hz, 1H), 6.09 – 6.02 (m, 2H), 5.43 – 5.35 (m, 2H), 5.28 (d, *J* = 10.4 Hz, 1H), 5.21 (d, *J* = 9.4 Hz, 1H), 4.80 (d, *J* = 5.2 Hz, 2H), 4.61 (d, *J* = 5.6 Hz, 2H), 3.89 (s, 3H), 3.74 (dd, *J* = 7.2, 5.6 Hz, 1H), 2.88 (dd, *J* = 16.4, 5.2 Hz, 1H), 2.75 (dd, *J* = 24.0, 7.2 Hz, 1H); ESI-MS [*M* + *H*]<sup>+</sup>: *m/z* 598.30

Methyl 2-(allyloxy)-3-methoxy-4-nitrobenzoate (S25-1)

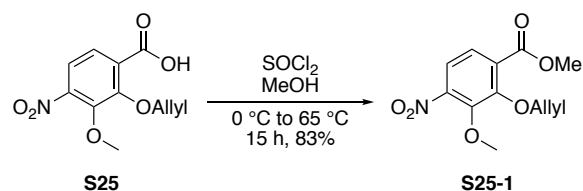

Compound **S25** (5.70 g, 7.50 mmol) was dissolved in MeOH (50.0 mL) and cooled to 0 °C followed by the slow addition of SOCl<sub>2</sub> (5.44 mL, 75.0 mmol) via syringe. After stirring at 5 °C for 1 h, the mixture was heated to 65 °C for 14 h. After concentrating *in vacuo*, the crude material was dissolved in 1M NaHCO<sub>3</sub> (100 mL) and extracted with EtOAc (50.0 mL). The organic phase was separated, dried over Na<sub>2</sub>SO<sub>4</sub> and concentrated *in vacuo*. Compound **S25-1** was obtained as a light yellow oil (5.00 g, 18.7 mmol, 83%).

<sup>1</sup>H NMR (400 MHz, DMSO-*d*<sub>6</sub>) δ 7.72 (d, *J* = 8.4 Hz, 1H), 7.57 (d, *J* = 8.4 Hz, 1H), 6.14 – 5.96 (m, 1H), 5.38 (dd, *J* = 17.2 Hz, 1.6 Hz, 1H), 5.26 (dd, *J* = 10.4 Hz, 1.6 Hz, 1H), 4.57 (d, *J* = 6.0 Hz, 2H), 3.93 (s, 3H), 3.86 (s, 3H); ESI-MS [*M* + *H*]<sup>+</sup>: *m/z* 268.08

Methyl 2-(allyloxy)-4-amino-3-methoxybenzoate (S25-2)

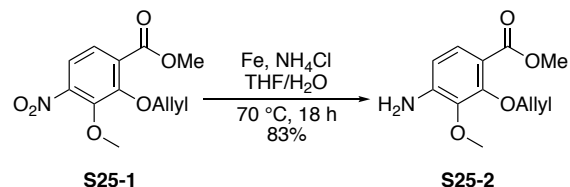

Compound **S25-1** (2.00 g, 7.48 mmol) was dissolved in a mixture of THF (30.0 mL) and H<sub>2</sub>O (20.0 mL) followed by the addition of NH<sub>4</sub>Cl (2.00 g, 37.4 mmol) and Fe (1.67 g, 29.9 mmol). The reaction was heated at 70 °C for 18 h. After cooling and filtering, the filtrate was washed with EtOAc (0.150 L) and the organic phase separated. The organic phase was concentrated *in vacuo* and the crude material purified via flash column chromatography with a gradient of 0-20% EtOAc in Pet. ether to afford **S25-2** as light oil that appears as a yellow solid when cooled. (1.47 g, 6.21 mmol, 83%).

<sup>1</sup>H NMR (400 MHz, DMSO-*d*<sub>6</sub>) δ 7.31 (d, *J* = 8.8 Hz, 1H), 6.44 (d, *J* = 8.8 Hz, 1H), 6.12 – 6.04 (m, 1H), 5.75 (s, 2H), 5.36 (dd, *J*<sub>1</sub> = 18.0 Hz, *J*<sub>2</sub> = 2.0 Hz, 1H), 5.20 (dd, *J*<sub>1</sub> = 10.4 Hz, *J*<sub>2</sub> = 2.0 Hz, 1H), 4.44 (dd, *J*<sub>1</sub> = 5.6 Hz, *J*<sub>2</sub> = 1.6 Hz, 2H), 3.70 (s, 3H), 3.68 (s, 3H); ESI-MS [*M* + *H*]<sup>+</sup>: *m/z* 238.10

Methyl (E)-2-(allyloxy)-4-(3-(4-(allyloxy)phenyl)-2-methylacrylamido)-3-methoxybenzoate (S50)

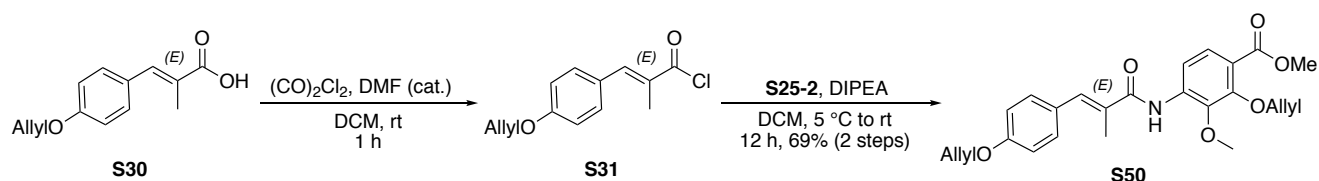

Compound **S30** (3.22 g, 14.75 mmol) was dissolved in DCM (20.0 mL) followed by the addition of one drop of dry DMF and dropwise addition of oxalyl dichloride (3.87 mL, 44.2 mmol). After stirring at room temperature for 1 h, the reaction was quenched with MeOH and concentrated *in vacuo*. Remaining reagents were co-evaporated with DCM and the crude aryl chloride was dissolved in 20.0 mL of dry DCM and added to a mixture of **S25-2** (3.50 g, 14.7 mmol) and DIPEA (12.8 mL, 73.7 mmol) in DCM (10.0 mL). The reaction mixture was stirred at room temperature for 3 h. After quenching with 50.0 mL of H<sub>2</sub>O, the solution was diluted with DCM (0.100 L). The organic phase was washed with 1M HCl and separated. After concentrating *in vacuo* the crude material was purified via RP-HPLC resulting in **S50** (4.42 g, 10.1 mmol, 69%) as a white solid.

<sup>1</sup>H NMR (400 MHz, CDCl<sub>3</sub>) δ 8.47 (s, 1H), 8.33 (d, *J* = 8.8 Hz, 1H), 7.67 (d, *J* = 8.8 Hz, 1H), 7.45 (s, 1H), 7.38 (d, *J* = 8.8 Hz, 2H), 6.97 (d, *J* = 8.8 Hz, 2H), 6.25 – 6.01 (m, 2H), 5.48 – 5.42 (m, 2H), 5.36 – 5.25 (m, 2H), 4.60 – 4.56 (m, 4H), 4.00 (s, 3H), 3.90 (s, 3H), 2.25 (d, *J* = 1.2 Hz, 3H); ESI-MS [*M* + *H*]<sup>+</sup>: *m/z* 437.90

(*E*)-2-(allyloxy)-4-(3-(4-(allyloxy)phenyl)-2-methylacrylamido)-3-methoxybenzoic acid (**S51**)

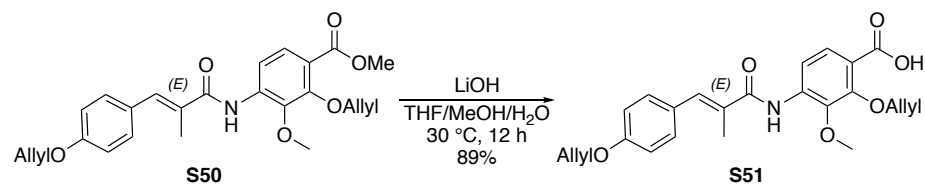

Compound **S50** (5.00 g, 11.4 mmol) was dissolved in a mixture of THF (30.0 mL), MeOH (5.00 mL) and H<sub>2</sub>O (6.00 mL) followed by the addition of LiOH · H<sub>2</sub>O (1.37 g, 57.1 mmol). After stirring at 30 °C for 12 h, the mixture was concentrated *in vacuo*. The crude residue was dissolved in H<sub>2</sub>O (30.0 mL) and the pH was adjusted to 6 with 1 M HCl resulting in a precipitate. The white solid was filtered, washed with H<sub>2</sub>O (50.0 mL), and concentrated *in vacuo*. The resulting white solid (**S51**) was used without further purification (4.29 g, 10.1 mmol, 89%).

<sup>1</sup>H NMR (400 MHz, DMSO-*d*<sub>6</sub>) δ 9.11 (s, 1H), 7.83 (d, *J* = 8.4 Hz, 1H), 7.45 (dd, *J* = 8.4, 4.4 Hz, 3H), 7.37 (s, 1H), 7.03 (d, *J* = 8.4 Hz, 2H), 6.18 – 5.95 (m, 2H), 5.43 – 5.35 (m, 2H), 5.32 – 5.17 (m, 2H), 4.62 (d, *J* = 5.2 Hz, 2H), 4.53 (d, *J* = 5.6 Hz, 2H), 3.86 (s, 3H), 2.15 (s, 3H); ESI-MS [*M* + *H*]<sup>+</sup>: *m/z* 424.20

Allyl (*S,E*)-4-(2-(allyloxy)-4-(4-(2-(2-(allyloxy)-4-(3-(4-(allyloxy)phenyl)-2-methylacrylamido)-3-methoxybenzamido)-3-cyanopropanamido)benzamido)-3-methoxybenzamido)benzoate (**S52**)

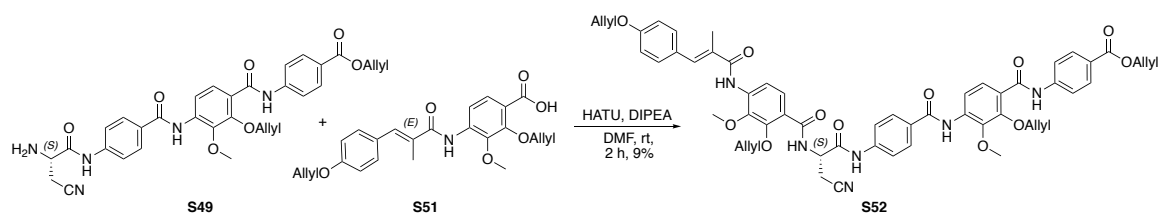

Compound **S49** (1.10 g, 1.73 mmol, HCl salt), and dimer **S51** (661 mg, 1.56 mmol) were dissolved in DMF (10.0 mL) followed by the addition of DIPEA (907  $\mu$ L, 5.20 mmol) and HATU (792 mg, 2.08 mmol). The reaction mixture was stirred at room temperature for 2 h. Following consumption of starting material, the mixture was then diluted with EtOAc (20.0 mL) and washed with H<sub>2</sub>O (1x), and brine (1x) successively. The organic phase was separated and concentrated *in vacuo*. The crude residue was purified via prep RP-HPLC (67-97% H<sub>2</sub>O/ACN) to afford **S52** as an off-white solid (0.160 g, 0.160 mmol, 9%).

<sup>1</sup>H NMR (400 MHz, CDCl<sub>3</sub>)  $\delta$  10.20 (s, 1H), 9.42 (s, 1H), 8.91 (d, *J* = 7.6 Hz, 1H), 8.64 (s, 1H), 8.52 – 8.38 (m, 3H), 8.12 – 8.04 (m, 3H), 7.99 (d, *J* = 9.2 Hz, 1H), 7.89 (d, *J* = 8.8 Hz, 2H), 7.80 – 7.71 (m, 4H), 7.46 (s, 1H), 7.38 (d, *J* = 8.8 Hz, 2H), 7.00 – 6.94 (m, 2H), 6.25 - 5.98 (m, 4H), 5.62 – 5.38 (m, 5H), 5.37 – 5.28 (m, 3H), 5.26 – 5.18 (m, 1H), 4.83 (d, *J* = 5.6 Hz, 2H), 4.76 (d, *J* = 6.0 Hz, 2H), 4.72 (d, *J* = 6.0 Hz, 2H), 4.59 (td, *J* = 5.2, 1.2 Hz, 2H), 4.04 (s, 3H), 3.98 (s, 3H), 3.13 – 2.98 (m, 2H), 2.26 (s, 3H); ESI-MS [*M* + *H*]<sup>+</sup>: *m/z* 1003.60

(*S,E*)-4-(4-(4-(3-cyano-2-(2-hydroxy-4-(3-(4-hydroxyphenyl)-2-methylacrylamido)-3-methoxybenzamido)propanamido)benzamido)-2-hydroxy-3-methoxybenzamido)benzoic acid (**S53**)

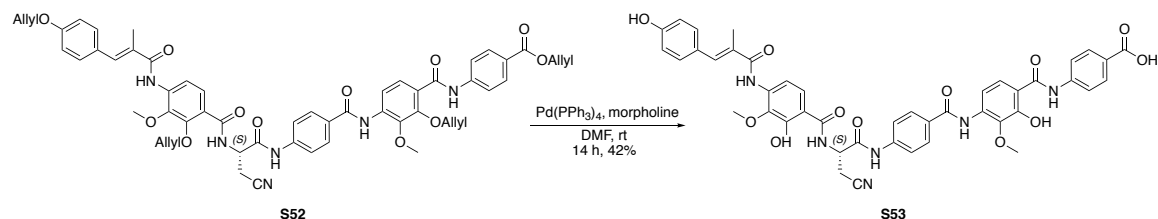

Linear compound **S52** (0.100 g, 99.7  $\mu$ mol) was dissolved in DMF (3.00 mL) followed by the addition of morpholine (70.2  $\mu$ L, 798  $\mu$ mol) and Pd(PPh<sub>3</sub>)<sub>4</sub> (34.6 mg, 29.9  $\mu$ mol) under N<sub>2</sub>(g). The reaction mixture stirred at room temperature for 14 h under the exclusion of light. The reaction mixture was then cooled to 5 °C and acidified to pH 5 with TFA. The mixture was then directly purified via RP-HPLC (H<sub>2</sub>O/MeOH+0.1%TFA) to give **S53** (35.0 mg, 41.5  $\mu$ mol, 42%) as an off-white solid.

<sup>1</sup>H NMR (600 MHz, DMSO-*d*<sub>6</sub>)  $\delta$  12.44 (s, 1H), 12.14 (s, 1H), 10.62 (d, *J* = 18.1 Hz, 2H), 9.89 (s, 1H), 9.58 (s, 1H), 9.39 (d, *J* = 7.3 Hz, 1H), 9.07 (s, 1H), 7.96 (t, *J* = 8.2 Hz, 4H), 7.84 (d, *J* = 8.1 Hz, 2H), 7.78 (d, *J* = 9.2 Hz, 3H), 7.73 (d, *J* = 9.0 Hz, 1H), 7.65 (d, *J* = 8.6 Hz, 1H), 7.61 (d, *J* = 8.6 Hz, 1H), 7.35 (d, *J* = 10.2 Hz, 3H), 6.83 (d, *J* = 7.8 Hz, 2H), 5.03 (t, *J* = 7.0 Hz, 1H), 3.84 (d, *J* = 8.0 Hz, 6H), 2.14 (s, 3H); <sup>13</sup>C NMR (151 MHz, DMSO-*d*<sub>6</sub>)  $\delta$  169.31, 168.39, 168.07, 167.77, 167.15, 165.12, 157.80, 153.69, 153.54, 142.21, 141.89, 139.38, 138.33, 136.58, 136.27, 134.89, 131.65, 130.46, 129.35, 129.14, 128.97, 126.65, 126.41, 123.38, 123.23, 120.80, 119.35, 118.15, 115.61, 113.57, 113.11, 111.87, 111.56, 60.49, 60.42, 50.34, 20.35, 14.51; HRMS (ESI): *m/z* calculated for C<sub>44</sub>H<sub>39</sub>N<sub>6</sub>O<sub>12</sub><sup>+</sup> [*M* + *H*]<sup>+</sup>: 843.2626; observed 843.2627

(*S,E*)-4-(4-(4-(3-cyano-2-(2-hydroxy-4-(3-(4-hydroxyphenyl)-2-methylacrylamido)-3-methoxybenzamido)propanamido)-2-hydroxy-3-methoxybenzamido)-2-hydroxy-3-methoxybenzamido)benzoic acid (**PABA95-2**)

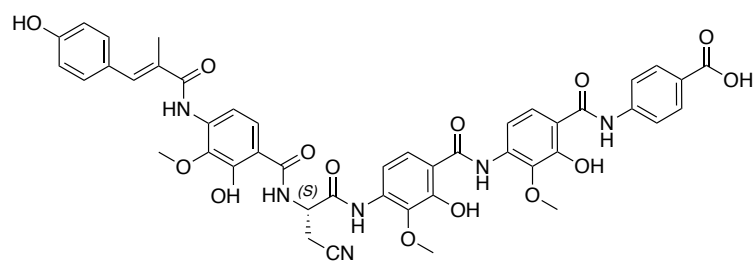

**PABA95-2**

The synthetic protocols for the preparation of PABA95-2 were the same as described for PABA34 (**S37**) and PABA95 (**S53**). The product **PABA95-2** was obtained as white solid (18.0 mg, 11%).

<sup>1</sup>H NMR (600 MHz, DMSO-*d*<sub>6</sub>) δ 12.72 (s, 1H), 12.44 (s, 1H), 12.25 (s, 1H), 11.65 (s, 1H), 11.10 (s, 1H), 10.65 (s, 1H), 9.82 (s, 1H), 9.47 (s, 1H), 9.07 (s, 1H), 8.10 – 7.99 (m, 1H), 7.95 (d, *J* = 8.3 Hz, 2H), 7.84 (d, *J* = 8.4 Hz, 2H), 7.81 (s, 1H), 7.75 (d, *J* = 9.0 Hz, 1H), 7.67 (d, *J* = 8.9 Hz, 1H), 7.35 (d, *J* = 7.7 Hz, 3H), 6.84 (d, *J* = 8.2 Hz, 2H), 5.25 (d, *J* = 7.2 Hz, 1H), 3.88 (s, 3H), 3.84 (s, 3H), 3.73 (s, 3H), 3.20 – 3.11 (m, 2H), 2.15 (s, 3H); <sup>13</sup>C NMR (151 MHz, DMSO-*d*<sub>6</sub>) δ 169.34, 168.08, 158.06, 157.86, 157.66, 157.45, 138.09, 136.50, 134.62, 131.41, 130.20, 128.92, 126.42, 123.84, 122.94, 120.34, 120.29, 118.29, 118.10, 116.30, 115.92, 115.38, 114.31, 111.12, 60.17, 60.05, 50.20, 19.83, 14.32; HRMS (ESI): *m/z* calculated for C<sub>45</sub>H<sub>41</sub>N<sub>6</sub>O<sub>14</sub><sup>+</sup> [M + H]<sup>+</sup>: 889.2681; observed 889.2607



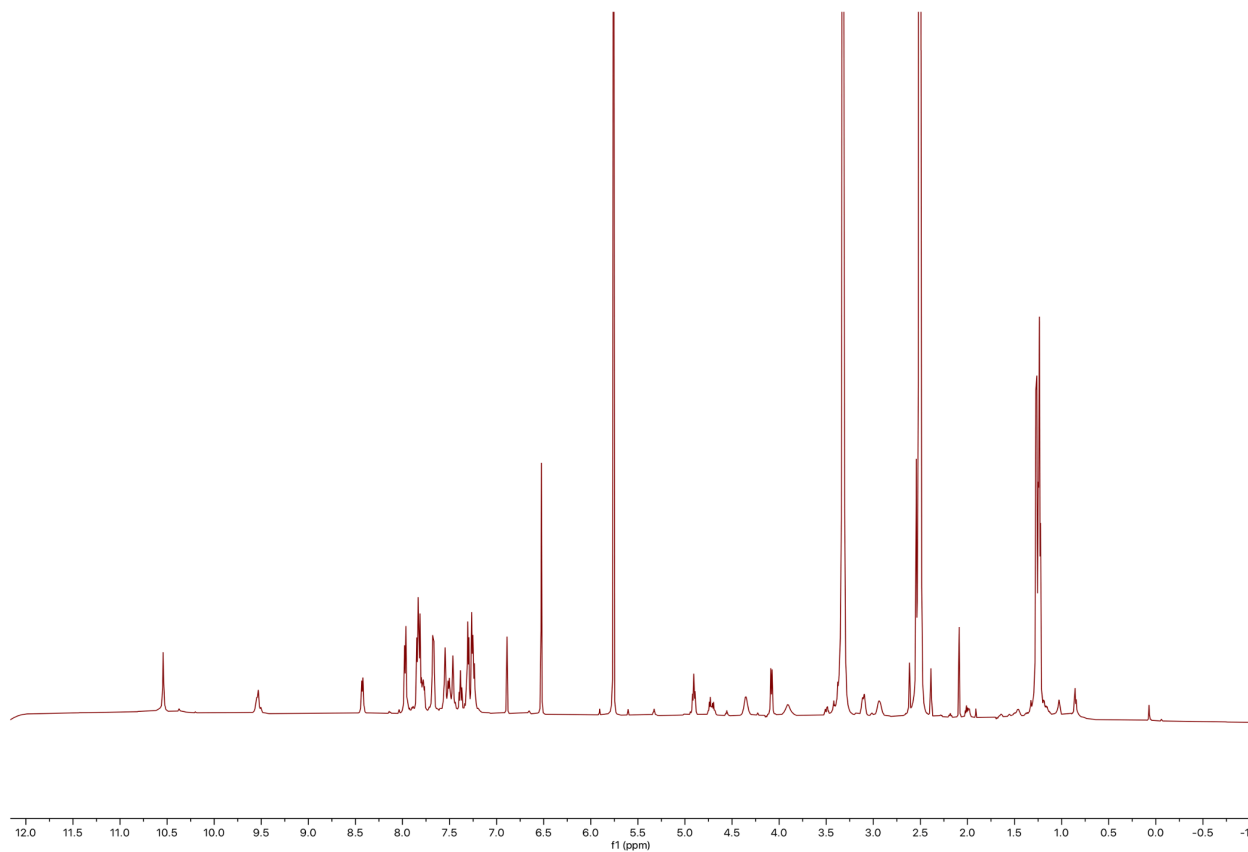

Supplementary Figure S11. <sup>1</sup>H-NMR spectrum of PABA48 (S13) in DMSO-d<sub>6</sub>.

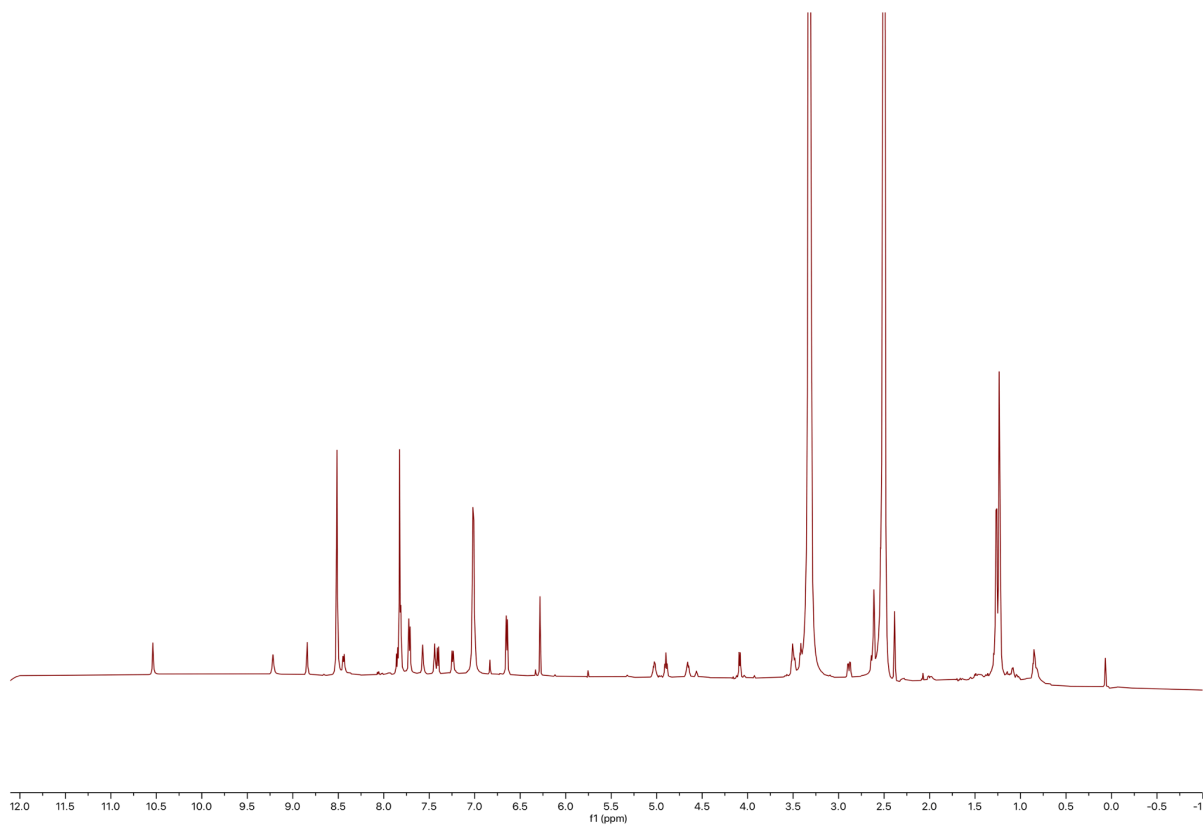

**Supplementary Figure S12.** <sup>1</sup>H-NMR spectrum of PABA70 (S16) in DMSO-d<sub>6</sub>.

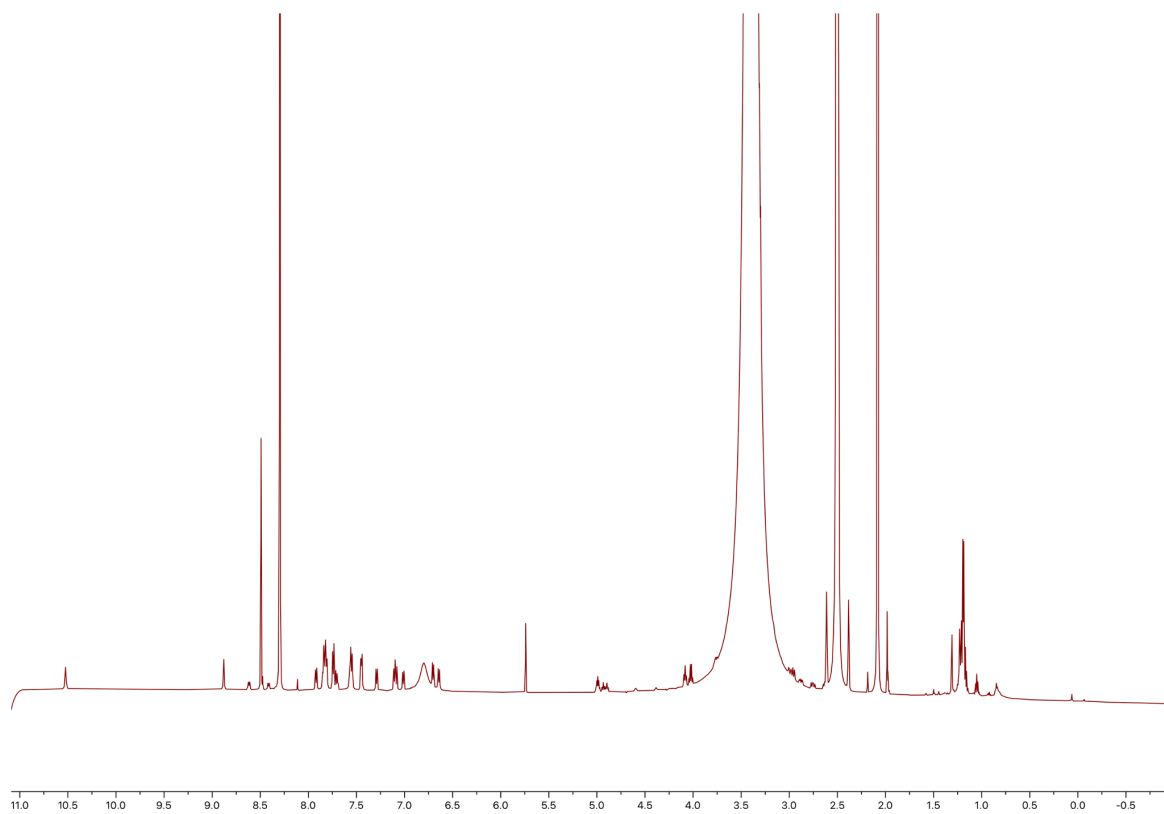

Supplementary Figure S13. <sup>1</sup>H-NMR spectrum of PABA57 (S24) in DMSO-d<sub>6</sub>.

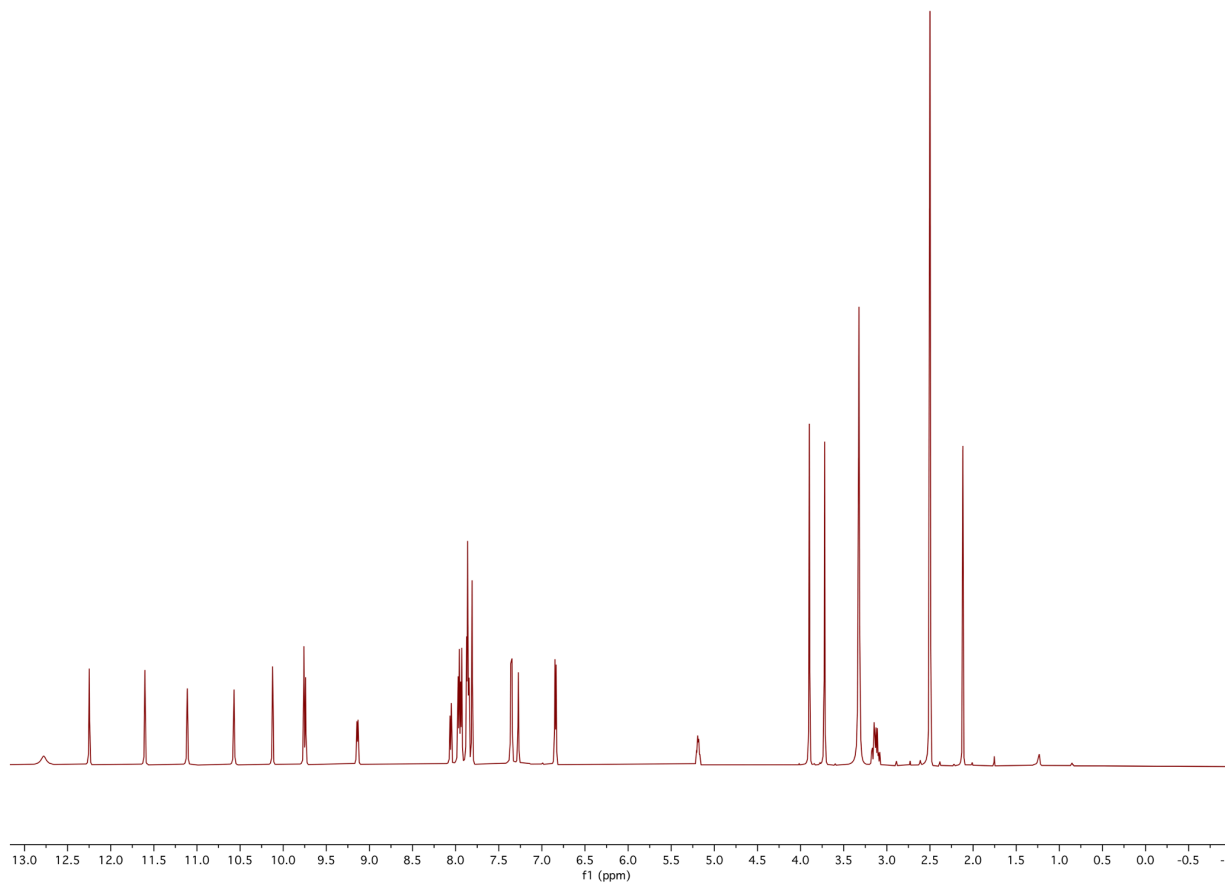

Supplementary Figure S14. <sup>1</sup>H-NMR spectrum of PABA34 (S37) in DMSO-d<sub>6</sub>.

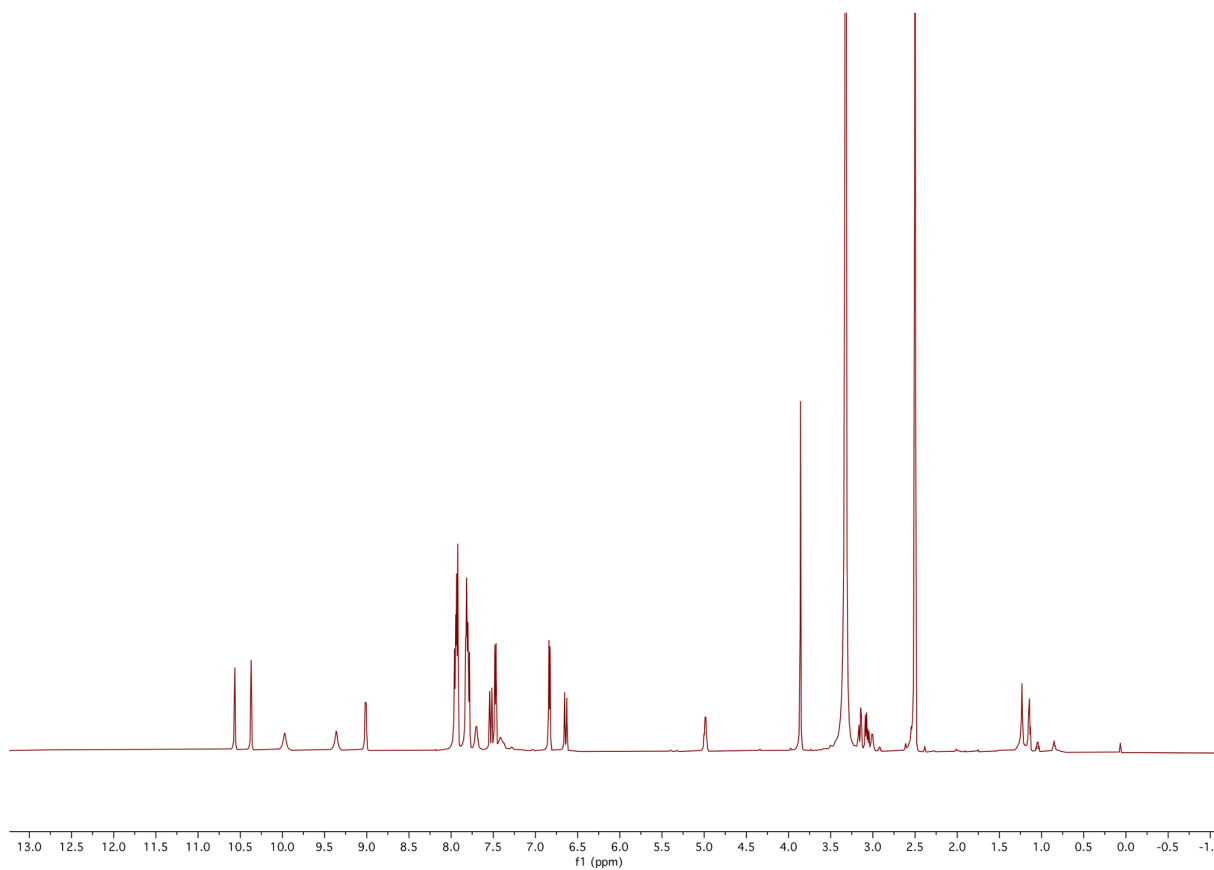

**Supplementary Figure S15.  $^1\text{H-NMR}$  spectrum of PABA157 (S47) in  $\text{DMSO-}d_6$ .**

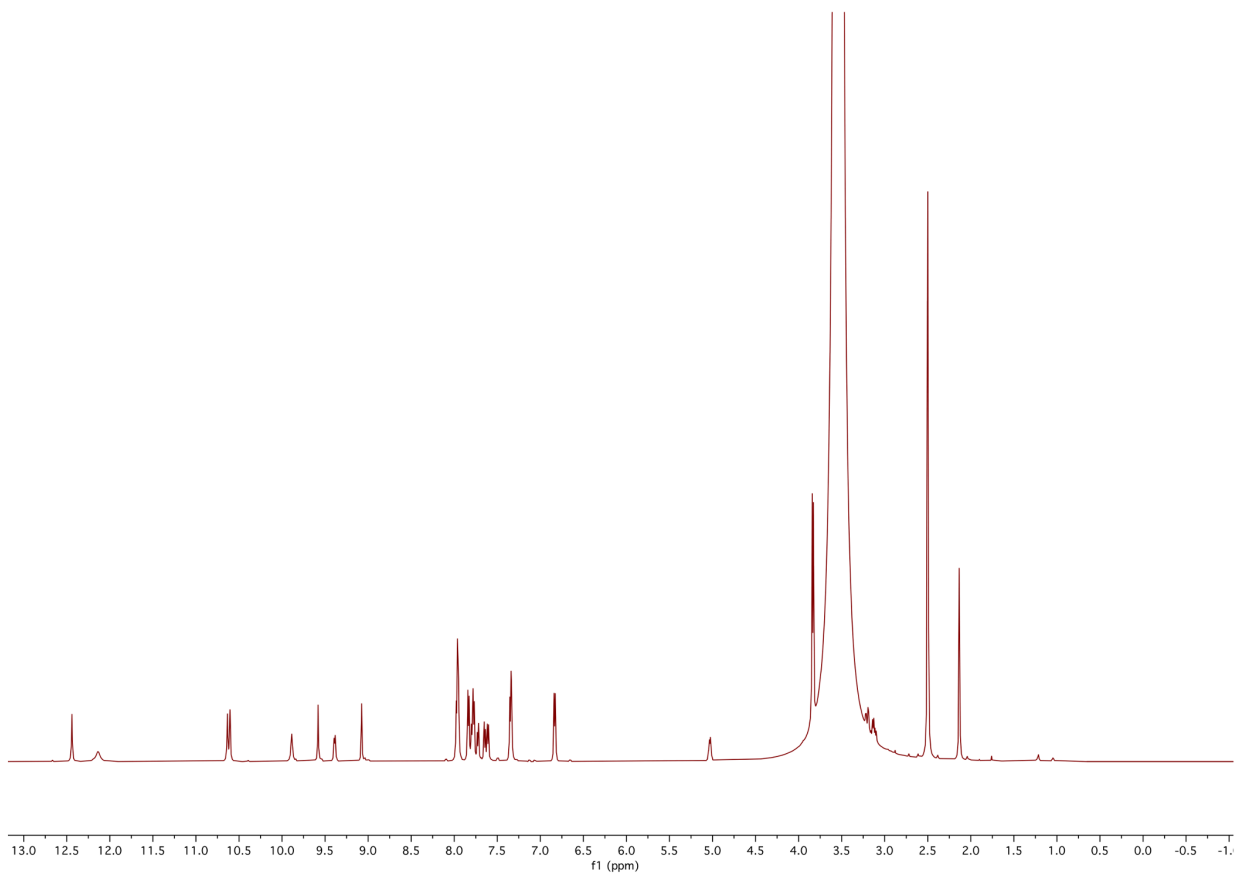

Supplementary Figure S16.  $^1\text{H-NMR}$  spectrum of PABA95 (S53) in  $\text{DMSO-}d_6$ .

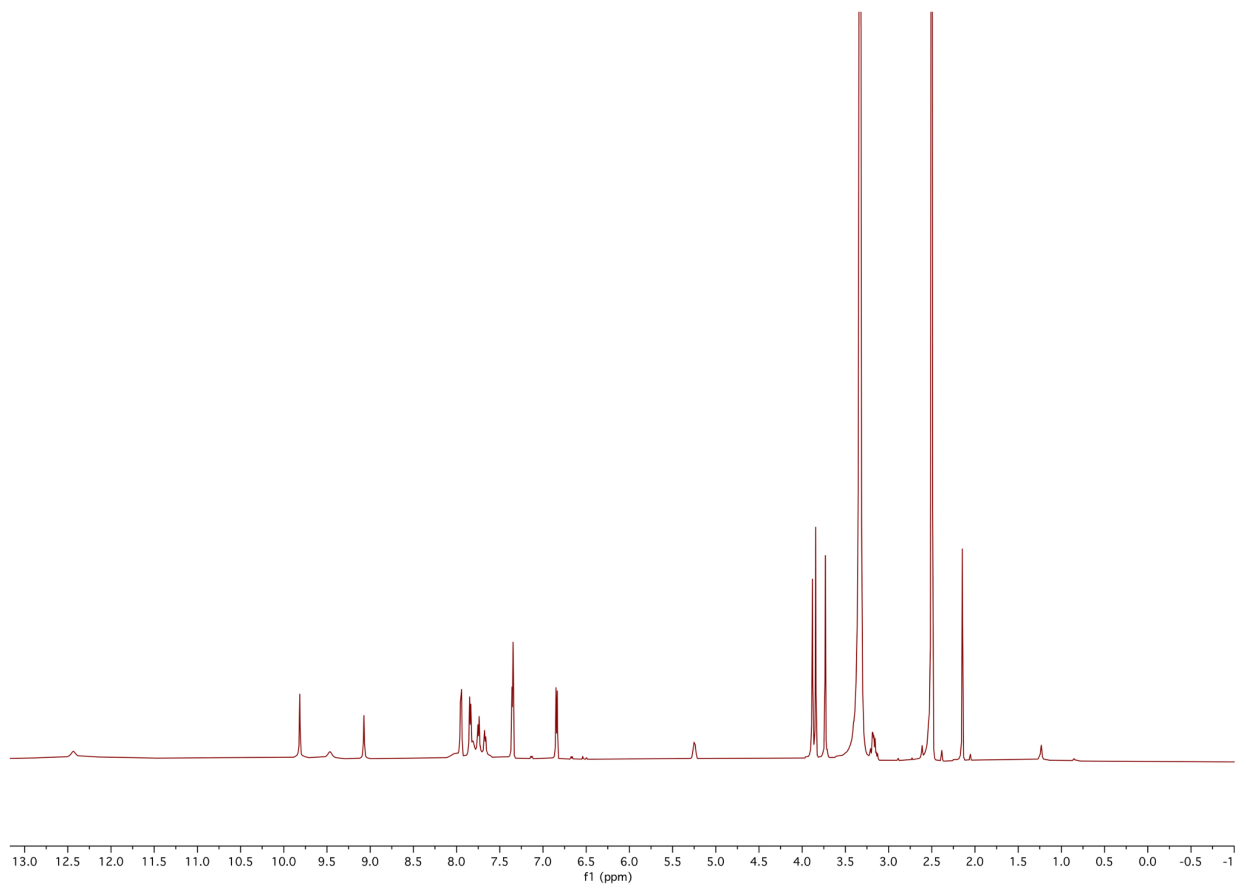

Supplementary Figure S17.  $^1\text{H-NMR}$  spectrum of PABA95-2 in  $\text{DMSO-}d_6$

## References:

- [1] S. F. Brady, *Nat Protoc* **2007**, 2, 1297-1305.
- [2] B. M. Hover, S. H. Kim, M. Katz, Z. Charlop-Powers, J. G. Owen, M. A. Ternei, J. Maniko, A. B. Estrela, H. Molina, S. Park, D. S. Perlin, S. F. Brady, *Nat Microbiol* **2018**, 3, 415-422.
- [3] J. G. Owen, B. V. Reddy, M. A. Ternei, Z. Charlop-Powers, P. Y. Calle, J. H. Kim, S. F. Brady, *Proc Natl Acad Sci U S A* **2013**, 110, 11797-11802.
- [4] J. G. Owen, Z. Charlop-Powers, A. G. Smith, M. A. Ternei, P. Y. Calle, B. V. Reddy, D. Montiel, S. F. Brady, *Proc Natl Acad Sci U S A* **2015**, 112, 4221-4226.
- [5] B. V. Reddy, A. Milshteyn, Z. Charlop-Powers, S. F. Brady, *Chem Biol* **2014**, 21, 1023-1033.
- [6] R. C. Edgar, *BMC Bioinformatics* **2004**, 5, 113.
- [7] I. Letunic, P. Bork, *Bioinformatics* **2007**, 23, 127-128.
- [8] W. Zhu, A. Lomsadze, M. Borodovsky, *Nucleic Acids Res* **2010**, 38, e132.
- [9] S. F. Altschul, W. Gish, W. Miller, E. W. Myers, D. J. Lipman, *J Mol Biol* **1990**, 215, 403-410.
- [10] T. Stachelhaus, H. D. Mootz, M. A. Marahiel, *Chem Biol* **1999**, 6, 493-505.
- [11] M. A. Wikler, *CLSI (NCCLS)* **2006**, 26, M7-A7.
- [12] L. Vieweg, J. Kretz, A. Pesic, D. Kerwat, S. Gratz, M. Royer, S. Cociancich, A. Mainz, R. D. Sussmuth, *J Am Chem Soc* **2015**, 137, 7608-7611.
- [13] S. Huttel, G. Testolin, J. Herrmann, T. Planke, F. Gille, M. Moreno, M. Stadler, M. Bronstrup, A. Kirschning, R. Muller, *Angew Chem Int Ed Engl* **2017**, 56, 12760-12764.
- [14] J. Kretz, D. Kerwat, V. Schubert, S. Gratz, A. Pesic, S. Semsary, S. Cociancich, M. Royer, R. D. Sussmuth, *Angew Chem Int Ed Engl* **2015**, 54, 1969-1973.
- [15] D. Kerwat, S. Gratz, J. Kretz, M. Seidel, M. Kunert, J. B. Weston, R. D. Sussmuth, *ChemMedChem* **2016**, 11, 1899-1903.
